# Supplementary material for: Electronic effect of ligands vs. reduction potentials of Fischer carbene complexes of chromium: a molecular electrostatic potential analysis
Source: Royal Society of Chemistry journal article supplement (doi:10.1039/c8nj04184a), 2018-01-01
Supplement: c8nj04184a1.pdf [file c8nj04184a1.pdf]

## Supporting Information

# Electronic Effect of Ligands vs. Reduction Potentials of Fischer Carbene Complexes of Chromium: A Molecular Electrostatic Potential Analysis

Bai Amutha Anjali <sup>a,b</sup> and Cherumuttathu H. Suresh <sup>\*,a,b</sup>

- a. Chemical Sciences and Technology Division, CSIR-National Institute for Interdisciplinary Science and Technology, Trivandrum 695019, India
- b. Academy of Scientific & Innovative Research (AcSIR), New Delhi 110020, India

### Contents

1. **Table S1.** Bond distances in Å of oxidised and reduced complexes.
2. **Table S2.** Complexes **1-2** with corresponding  $V_{Cr}$  (in a. u) values in acetonitrile.
3. **Table S3.** Complexes **3-8** with corresponding  $V_{Cr}$  (in a. u) values in acetonitrile.
4. Cartesian coordinates of optimized structures in Å.

**1. Table S1.** Bond distances in Å of oxidised and reduced complexes.

|           | Oxidised |       |       | Reduced |       |       |
|-----------|----------|-------|-------|---------|-------|-------|
|           | Cr-C     | C-N   | C-C   | Cr-C    | C-N   | C-C   |
| <b>1a</b> | 2.160    | 1.323 | 1.497 | 2.252   | 1.417 | 1.451 |
| <b>1b</b> | 2.159    | 1.322 | 1.497 | 2.250   | 1.415 | 1.449 |
| <b>1c</b> | 2.158    | 1.322 | 1.497 | 2.251   | 1.412 | 1.449 |
| <b>1d</b> | 2.158    | 1.322 | 1.497 | 2.248   | 1.412 | 1.446 |
| <b>1e</b> | 2.157    | 1.321 | 1.495 | 2.241   | 1.390 | 1.438 |
| <b>1f</b> | 2.156    | 1.321 | 1.496 | 2.244   | 1.402 | 1.441 |
| <b>2a</b> | 2.106    | 1.324 | 1.487 | 2.226   | 1.425 | 1.439 |
| <b>2b</b> | 2.100    | 1.323 | 1.488 | 2.226   | 1.421 | 1.437 |
| <b>2c</b> | 2.098    | 1.322 | 1.488 | 2.225   | 1.419 | 1.437 |
| <b>2d</b> | 2.095    | 1.322 | 1.489 | 2.223   | 1.417 | 1.435 |
| <b>2e</b> | 2.097    | 1.321 | 1.486 | 2.218   | 1.391 | 1.430 |
| <b>2f</b> | 2.093    | 1.322 | 1.487 | 2.221   | 1.403 | 1.431 |

2. **Table S2.** Complexes **1-2** with corresponding  $V_{Cr}$  (in a. u) values in acetonitrile.

| R                        | $V_{Cr}$     |              |
|--------------------------|--------------|--------------|
|                          | <b>1a-1n</b> | <b>2a-2n</b> |
| <b>OCH<sub>3</sub></b>   | -103.4789    | -103.4867    |
| <b>CH<sub>3</sub></b>    | -103.4784    | -103.4857    |
| <b>H</b>                 | -103.4758    | -103.4836    |
| <b>Cl</b>                | -103.4679    | -103.4759    |
| <b>COOCH<sub>3</sub></b> | -103.4557    | -103.4615    |
| <b>CF<sub>3</sub></b>    | -103.4594    | -103.4664    |
| <b>F</b>                 | -103.4709    | -103.4787    |
| <b>Ph</b>                | -103.4683    | -103.4731    |
| <b>Br</b>                | -103.4677    | -103.4755    |
| <b>SH</b>                | -103.4675    | -103.4749    |
| <b>CHCH<sub>2</sub></b>  | -103.4661    | -103.4712    |
| <b>OCF<sub>3</sub></b>   | -103.4651    | -103.4731    |
| <b>NC</b>                | -103.4542    | -103.4605    |
| <b>CN</b>                | -103.4496    | -103.4561    |

**3. Table S3.** Complexes **3-8** with corresponding  $V_{Cr}$  (in a. u) values in acetonitrile.

| R                  | $V_{Cr}$  |           |           |           |           |           |
|--------------------|-----------|-----------|-----------|-----------|-----------|-----------|
|                    | 3a-3l     | 4a-4l     | 5a-5l     | 6a-6l     | 7a-7l     | 8a-8l     |
| OCH <sub>3</sub>   | -103.4827 | -103.4750 | -103.4805 | -103.4875 | -103.4861 | -103.4991 |
| CH <sub>3</sub>    | -103.4844 | -103.4763 | -103.4854 | -103.4820 | -103.4800 | -103.4924 |
| H                  | -103.4826 | -103.4745 | -103.4845 | -103.4793 | -103.4773 | -103.4901 |
| CHCH <sub>2</sub>  | -103.4806 | -103.4720 | -103.4810 | -103.4785 | -103.4765 | -103.4877 |
| SH                 | -103.4765 | -103.4682 | -103.4782 | -103.4763 | -103.4746 | -103.4868 |
| Br                 | -103.4744 | -103.4653 | -103.4772 | -103.4767 | -103.4756 | -103.4871 |
| COOCH <sub>3</sub> | -103.4744 | -103.4670 | -103.4762 | -103.4835 | -103.4832 | -103.4904 |
| Cl                 | -103.4743 | -103.4653 | -103.4770 | -103.4772 | -103.4766 | -103.4876 |
| OCF <sub>3</sub>   | -103.4715 | -103.4627 | -103.4742 | -103.4737 | -103.4738 | -103.4836 |
| CF <sub>3</sub>    | -103.4697 | -103.4618 | -103.4732 | -103.4707 | -103.4723 | -103.4808 |
| NC                 | -103.4671 | -103.4588 | -103.4700 | -103.4695 | -103.4700 | -103.4785 |
| CN                 | -103.4649 | -103.4568 | -103.4682 | -103.4654 | -103.4663 | -103.4744 |

**4. Cartesian coordinates of optimized structures in Å.**

|           |              |              |              |            |              |              |              |
|-----------|--------------|--------------|--------------|------------|--------------|--------------|--------------|
| <b>1a</b> |              |              |              | <b>1a'</b> |              |              |              |
| 24        | -1.690117000 | -0.494794000 | 0.026337000  | 24         | -1.772887000 | -0.526572000 | 0.013205000  |
| 6         | -2.941199000 | 0.366291000  | -1.124729000 | 6          | -3.156165000 | 0.642309000  | -0.538686000 |
| 8         | -3.728041000 | 0.809905000  | -1.835746000 | 8          | -4.098972000 | 1.215737000  | -0.889371000 |
| 6         | -2.924937000 | -1.908868000 | 0.169821000  | 6          | -3.090727000 | -1.816127000 | -0.145553000 |
| 8         | -3.686373000 | -2.766466000 | 0.259515000  | 8          | -3.915342000 | -2.628920000 | -0.256075000 |
| 6         | -0.507772000 | -1.529773000 | 1.131000000  | 6          | -0.706862000 | -1.986969000 | 0.610954000  |
| 8         | 0.136945000  | -2.211079000 | 1.788335000  | 8          | -0.205119000 | -2.949879000 | 1.002963000  |
| 6         | -2.433120000 | 0.296912000  | 1.597251000  | 6          | -2.074469000 | -0.103403000 | 1.832034000  |
| 8         | -2.879957000 | 0.750471000  | 2.553324000  | 8          | -2.241352000 | 0.159601000  | 2.944755000  |
| 6         | -0.952285000 | -1.328869000 | -1.526301000 | 6          | -1.154410000 | -0.580708000 | -1.781106000 |
| 8         | -0.558113000 | -1.865275000 | -2.461457000 | 8          | -0.784314000 | -0.566829000 | -2.875334000 |
| 6         | -0.221806000 | 1.084148000  | -0.097250000 | 6          | -0.085620000 | 0.964323000  | 0.075367000  |
| 7         | -0.388722000 | 2.392234000  | -0.200107000 | 7          | -0.279132000 | 2.367918000  | 0.081493000  |
| 6         | 1.215248000  | 0.673194000  | -0.007153000 | 6          | 1.322773000  | 0.615084000  | 0.061919000  |
| 6         | 1.896104000  | 0.797267000  | 1.216560000  | 6          | 2.305827000  | 1.495767000  | 0.616751000  |
| 6         | 1.909626000  | 0.135477000  | -1.091222000 | 6          | 1.845663000  | -0.598483000 | -0.453536000 |
| 6         | 3.215162000  | 0.393612000  | 1.346560000  | 6          | 3.651586000  | 1.184054000  | 0.663898000  |
| 1         | 1.379097000  | 1.198224000  | 2.083252000  | 1          | 1.966168000  | 2.429012000  | 1.051867000  |
| 6         | 3.243503000  | -0.262669000 | -0.975230000 | 6          | 3.202017000  | -0.916916000 | -0.417313000 |
| 1         | 1.417506000  | 0.023592000  | -2.050550000 | 1          | 1.177923000  | -1.309797000 | -0.918337000 |
| 6         | 3.903192000  | -0.139746000 | 0.249408000  | 6          | 4.121226000  | -0.028972000 | 0.143252000  |
| 1         | 3.732520000  | 0.475896000  | 2.296029000  | 1          | 4.364244000  | 1.866916000  | 1.118613000  |

|                            |              |              |              |                            |              |              |              |
|----------------------------|--------------|--------------|--------------|----------------------------|--------------|--------------|--------------|
| 1                          | 3.744007000  | -0.671578000 | -1.843871000 | 1                          | 3.521699000  | -1.863329000 | -0.839369000 |
| 6                          | 0.693655000  | 3.386245000  | -0.373498000 | 6                          | 0.205920000  | 3.136828000  | -1.060654000 |
| 1                          | 0.416195000  | 4.060528000  | -1.186718000 | 1                          | -0.535957000 | 3.154718000  | -1.878625000 |
| 1                          | 0.809702000  | 3.975027000  | 0.539796000  | 1                          | 0.404105000  | 4.176374000  | -0.768933000 |
| 1                          | 1.633934000  | 2.902525000  | -0.610604000 | 1                          | 1.127894000  | 2.708225000  | -1.448661000 |
| 6                          | -1.702999000 | 3.048661000  | -0.195065000 | 6                          | -1.460834000 | 2.972463000  | 0.659357000  |
| 1                          | -2.447625000 | 2.407683000  | 0.256570000  | 1                          | -1.788765000 | 2.416228000  | 1.532759000  |
| 1                          | -1.631923000 | 3.972932000  | 0.381499000  | 1                          | -1.217812000 | 3.993392000  | 0.982706000  |
| 1                          | -2.005283000 | 3.297605000  | -1.215328000 | 1                          | -2.301653000 | 3.046104000  | -0.047153000 |
| 6                          | 5.935079000  | -1.089858000 | -0.586136000 | 6                          | 5.982808000  | -1.480190000 | -0.241450000 |
| 1                          | 6.918381000  | -1.313345000 | -0.176799000 | 1                          | 7.058437000  | -1.465861000 | -0.060606000 |
| 1                          | 5.469070000  | -2.016926000 | -0.935293000 | 1                          | 5.539360000  | -2.329228000 | 0.293658000  |
| 1                          | 6.042815000  | -0.395289000 | -1.425957000 | 1                          | 5.802861000  | -1.608549000 | -1.316466000 |
| 8                          | 5.195633000  | -0.507506000 | 0.477597000  | 8                          | 5.486639000  | -0.247994000 | 0.230535000  |
| E= -2130.32576674 Hartrees |              |              |              | E= -2130.35992286 Hartrees |              |              |              |
| <b>1b</b>                  |              |              |              | <b>1b'</b>                 |              |              |              |
| 24                         | -1.456612000 | -0.433165000 | 0.017679000  | 24                         | -1.559237000 | -0.431446000 | 0.013737000  |
| 6                          | -2.612889000 | 0.572736000  | -1.116506000 | 6                          | -2.802098000 | 0.890440000  | -0.524328000 |
| 8                          | -3.342313000 | 1.112591000  | -1.821736000 | 8                          | -3.671129000 | 1.572828000  | -0.870140000 |
| 6                          | -2.798457000 | -1.752639000 | 0.077564000  | 6                          | -3.013094000 | -1.567119000 | -0.136321000 |
| 8                          | -3.625703000 | -2.550901000 | 0.116894000  | 8                          | -3.924196000 | -2.282345000 | -0.240218000 |
| 6                          | -0.378519000 | -1.599474000 | 1.094415000  | 6                          | -0.646187000 | -2.001283000 | 0.592516000  |
| 8                          | 0.197970000  | -2.355324000 | 1.734084000  | 8                          | -0.243584000 | -3.012653000 | 0.974406000  |
| 6                          | -2.165715000 | 0.333311000  | 1.615583000  | 6                          | -1.809715000 | -0.003321000 | 1.839306000  |
| 8                          | -2.593965000 | 0.765278000  | 2.590132000  | 8                          | -1.949908000 | 0.254766000  | 2.956862000  |
| 6                          | -0.749077000 | -1.263097000 | -1.554144000 | 6                          | -0.984384000 | -0.555038000 | -1.793012000 |
| 8                          | -0.376133000 | -1.796682000 | -2.498524000 | 8                          | -0.643265000 | -0.583175000 | -2.895709000 |
| 6                          | 0.116125000  | 1.045305000  | -0.032383000 | 6                          | 0.277897000  | 0.867230000  | 0.069416000  |
| 7                          | 0.046416000  | 2.365171000  | -0.041668000 | 7                          | 0.232078000  | 2.280277000  | 0.117597000  |
| 6                          | 1.517428000  | 0.518853000  | -0.038581000 | 6                          | 1.637893000  | 0.370053000  | 0.026175000  |
| 6                          | 2.216002000  | 0.372399000  | 1.167260000  | 6                          | 2.719999000  | 1.124991000  | 0.579953000  |
| 6                          | 2.156679000  | 0.141761000  | -1.224702000 | 6                          | 2.018745000  | -0.883798000 | -0.528610000 |
| 6                          | 3.509093000  | -0.141138000 | 1.180929000  | 6                          | 4.025666000  | 0.662320000  | 0.588087000  |
| 1                          | 1.741291000  | 0.650621000  | 2.103417000  | 1                          | 2.493059000  | 2.079929000  | 1.041268000  |
| 6                          | 3.454145000  | -0.365178000 | -1.200352000 | 6                          | 3.332353000  | -1.331101000 | -0.525073000 |
| 1                          | 1.643624000  | 0.244755000  | -2.174863000 | 1                          | 1.270151000  | -1.505976000 | -0.998720000 |
| 6                          | 4.153800000  | -0.523622000 | -0.000406000 | 6                          | 4.375501000  | -0.579533000 | 0.033612000  |
| 1                          | 4.023242000  | -0.250176000 | 2.131927000  | 1                          | 4.799073000  | 1.277711000  | 1.047092000  |
| 1                          | 3.925906000  | -0.648191000 | -2.137181000 | 1                          | 3.555154000  | -2.295955000 | -0.977904000 |
| 6                          | 1.198859000  | 3.287864000  | -0.142081000 | 6                          | 0.808000000  | 3.036797000  | -0.989785000 |
| 1                          | 0.993514000  | 4.018934000  | -0.927320000 | 1                          | 0.068829000  | 3.193043000  | -1.795265000 |
| 1                          | 1.325386000  | 3.821793000  | 0.802988000  | 1                          | 1.142126000  | 4.025724000  | -0.649852000 |
| 1                          | 2.111108000  | 2.752800000  | -0.377581000 | 1                          | 1.663101000  | 2.511931000  | -1.410090000 |
| 6                          | -1.214935000 | 3.115994000  | 0.022311000  | 6                          | -0.867724000 | 2.996537000  | 0.728742000  |
| 1                          | -2.013410000 | 2.492145000  | 0.399352000  | 1                          | -1.248667000 | 2.456651000  | 1.590578000  |
| 1                          | -1.083306000 | 3.969842000  | 0.689650000  | 1                          | -0.505803000 | 3.972524000  | 1.078519000  |
| 1                          | -1.480521000 | 3.487958000  | -0.970385000 | 1                          | -1.701118000 | 3.188315000  | 0.035782000  |
| 6                          | 5.539781000  | -1.118719000 | 0.026684000  | 6                          | 5.792602000  | -1.094356000 | 0.075856000  |
| 1                          | 5.502933000  | -2.194160000 | 0.231847000  | 1                          | 6.021627000  | -1.601944000 | 1.023181000  |
| 1                          | 6.052653000  | -0.988716000 | -0.929117000 | 1                          | 5.981274000  | -1.816974000 | -0.724634000 |

|                            |              |              |              |                            |              |              |              |
|----------------------------|--------------|--------------|--------------|----------------------------|--------------|--------------|--------------|
| 1                          | 6.158599000  | -0.663678000 | 0.804310000  | 1                          | 6.522283000  | -0.284489000 | -0.033634000 |
| E=-2055.09696511 Hartrees  |              |              |              | E= -2055.13220997 Hartrees |              |              |              |
| <b>1c</b>                  |              |              |              | <b>1c'</b>                 |              |              |              |
| 24                         | -1.240679000 | -0.312917000 | 0.012042000  | 24                         | -1.322026000 | -0.324788000 | 0.014798000  |
| 6                          | -2.160781000 | 0.815945000  | -1.220087000 | 6                          | -2.433939000 | 1.134859000  | -0.446035000 |
| 8                          | -2.747122000 | 1.443278000  | -1.983505000 | 8                          | -3.241543000 | 1.911857000  | -0.737521000 |
| 6                          | -2.771358000 | -1.409149000 | 0.047269000  | 6                          | -2.904268000 | -1.278409000 | -0.105805000 |
| 8                          | -3.712748000 | -2.069461000 | 0.069577000  | 8                          | -3.897058000 | -1.877734000 | -0.191724000 |
| 6                          | -0.396838000 | -1.568428000 | 1.191361000  | 6                          | -0.597143000 | -2.012615000 | 0.524899000  |
| 8                          | 0.037131000  | -2.362646000 | 1.894062000  | 8                          | -0.320928000 | -3.079193000 | 0.866545000  |
| 6                          | -1.910660000 | 0.608704000  | 1.543605000  | 6                          | -1.433399000 | 0.103223000  | 1.854406000  |
| 8                          | -2.326723000 | 1.125578000  | 2.481385000  | 8                          | -1.478582000 | 0.370955000  | 2.977239000  |
| 6                          | -0.606350000 | -1.327791000 | -1.482213000 | 6                          | -0.804210000 | -0.458546000 | -1.807624000 |
| 8                          | -0.288219000 | -1.970606000 | -2.376964000 | 8                          | -0.484167000 | -0.490686000 | -2.916773000 |
| 6                          | 0.534697000  | 0.913490000  | -0.021986000 | 6                          | 0.660015000  | 0.741498000  | 0.043457000  |
| 7                          | 0.664484000  | 2.228983000  | -0.032903000 | 7                          | 0.793771000  | 2.146503000  | 0.088350000  |
| 6                          | 1.842827000  | 0.184652000  | -0.021844000 | 6                          | 1.944138000  | 0.069849000  | 0.023678000  |
| 6                          | 2.495580000  | -0.083019000 | 1.189242000  | 6                          | 3.092342000  | 0.661980000  | 0.640100000  |
| 6                          | 2.429390000  | -0.252262000 | -1.216564000 | 6                          | 2.169858000  | -1.205707000 | -0.567428000 |
| 6                          | 3.706540000  | -0.771181000 | 1.202666000  | 6                          | 4.326581000  | 0.032439000  | 0.672520000  |
| 1                          | 2.048618000  | 0.237085000  | 2.125416000  | 1                          | 2.969728000  | 1.620846000  | 1.132131000  |
| 6                          | 3.643388000  | -0.936108000 | -1.198495000 | 6                          | 3.411400000  | -1.825170000 | -0.542286000 |
| 1                          | 1.937392000  | -0.058417000 | -2.163764000 | 1                          | 1.357178000  | -1.702262000 | -1.079394000 |
| 6                          | 4.287049000  | -1.198632000 | 0.009589000  | 6                          | 4.511564000  | -1.222175000 | 0.077440000  |
| 1                          | 4.194441000  | -0.976138000 | 2.150219000  | 1                          | 5.158117000  | 0.518800000  | 1.179242000  |
| 1                          | 4.082913000  | -1.268157000 | -2.133602000 | 1                          | 3.524899000  | -2.795871000 | -1.019617000 |
| 1                          | 5.227668000  | -1.739066000 | 0.022021000  | 1                          | 5.479558000  | -1.714380000 | 0.099542000  |
| 6                          | 1.943697000  | 2.969839000  | -0.099935000 | 6                          | 1.525839000  | 2.819968000  | -0.980677000 |
| 1                          | 1.870406000  | 3.724241000  | -0.886322000 | 1                          | 0.856121000  | 3.076891000  | -1.819935000 |
| 1                          | 2.122539000  | 3.477772000  | 0.851026000  | 1                          | 1.973267000  | 3.752893000  | -0.614464000 |
| 1                          | 2.772901000  | 2.306469000  | -0.314024000 | 1                          | 2.321783000  | 2.184830000  | -1.362065000 |
| 6                          | -0.469168000 | 3.162375000  | 0.005328000  | 6                          | -0.234556000 | 3.004947000  | 0.638139000  |
| 1                          | -1.375251000 | 2.653241000  | 0.301268000  | 1                          | -0.736347000 | 2.522324000  | 1.471293000  |
| 1                          | -0.252102000 | 3.955209000  | 0.724181000  | 1                          | 0.231655000  | 3.925526000  | 1.013362000  |
| 1                          | -0.611252000 | 3.615123000  | -0.979180000 | 1                          | -0.990825000 | 3.301350000  | -0.104538000 |
| E= -2015.77168313 Hartrees |              |              |              | E= -2015.80807423 Hartrees |              |              |              |
| <b>1d</b>                  |              |              |              | <b>1d'</b>                 |              |              |              |
| 24                         | -1.686867000 | -0.479269000 | 0.016807000  | 24                         | -1.801740000 | -0.474979000 | 0.014474000  |
| 6                          | -2.881104000 | 0.456516000  | -1.140206000 | 6                          | -3.103949000 | 0.783708000  | -0.538359000 |
| 8                          | -3.626371000 | 0.955600000  | -1.857966000 | 8                          | -4.000189000 | 1.424355000  | -0.892048000 |
| 6                          | -2.956478000 | -1.871014000 | 0.072971000  | 6                          | -3.198484000 | -1.683627000 | -0.126491000 |
| 8                          | -3.738297000 | -2.712971000 | 0.109433000  | 8                          | -4.072543000 | -2.443186000 | -0.224491000 |
| 6                          | -0.558616000 | -1.570771000 | 1.119240000  | 6                          | -0.808184000 | -1.989340000 | 0.609899000  |
| 8                          | 0.055586000  | -2.281070000 | 1.775605000  | 8                          | -0.350219000 | -2.972521000 | 1.001340000  |
| 6                          | -2.461027000 | 0.257310000  | 1.599677000  | 6                          | -2.088540000 | -0.050573000 | 1.837536000  |
| 8                          | -2.927179000 | 0.668519000  | 2.565305000  | 8                          | -2.253407000 | 0.203803000  | 2.951903000  |
| 6                          | -0.919221000 | -1.290075000 | -1.536935000 | 6                          | -1.231105000 | -0.600561000 | -1.793774000 |
| 8                          | -0.506487000 | -1.814848000 | -2.469450000 | 8                          | -0.894629000 | -0.631689000 | -2.897258000 |
| 6                          | -0.202004000 | 1.085922000  | -0.033101000 | 6                          | -0.037046000 | 0.917579000  | 0.061075000  |

|                            |              |              |              |                           |              |              |              |
|----------------------------|--------------|--------------|--------------|---------------------------|--------------|--------------|--------------|
| 7                          | -0.342490000 | 2.399955000  | -0.042580000 | 7                         | -0.155582000 | 2.323825000  | 0.106088000  |
| 6                          | 1.226489000  | 0.636741000  | -0.038635000 | 6                         | 1.344635000  | 0.491464000  | 0.024730000  |
| 6                          | 1.928448000  | 0.524729000  | 1.168852000  | 6                         | 2.383026000  | 1.303771000  | 0.585175000  |
| 6                          | 1.882446000  | 0.296326000  | -1.227797000 | 6                         | 1.787357000  | -0.746727000 | -0.524759000 |
| 6                          | 3.249173000  | 0.086108000  | 1.192430000  | 6                         | 3.713607000  | 0.919371000  | 0.602259000  |
| 1                          | 1.437331000  | 0.769785000  | 2.105223000  | 1                         | 2.104005000  | 2.241162000  | 1.052892000  |
| 6                          | 3.205690000  | -0.137776000 | -1.215445000 | 6                         | 3.118861000  | -1.134824000 | -0.523971000 |
| 1                          | 1.361973000  | 0.368339000  | -2.176249000 | 1                         | 1.071073000  | -1.409355000 | -0.988936000 |
| 6                          | 3.880901000  | -0.240045000 | -0.003471000 | 6                         | 4.084583000  | -0.302430000 | 0.039558000  |
| 1                          | 3.780752000  | -0.004242000 | 2.132345000  | 1                         | 4.462653000  | 1.556295000  | 1.062324000  |
| 1                          | 3.705102000  | -0.398631000 | -2.141082000 | 1                         | 3.408468000  | -2.081985000 | -0.966696000 |
| 6                          | 0.757090000  | 3.385938000  | -0.136510000 | 6                         | 0.414592000  | 3.118925000  | -0.978221000 |
| 1                          | 0.508481000  | 4.112665000  | -0.912818000 | 1                         | -0.321188000 | 3.271384000  | -1.786642000 |
| 1                          | 0.857538000  | 3.915979000  | 0.813813000  | 1                         | 0.718530000  | 4.109156000  | -0.615206000 |
| 1                          | 1.697172000  | 2.906239000  | -0.381251000 | 1                         | 1.286884000  | 2.626545000  | -1.401613000 |
| 6                          | -1.643377000 | 3.080228000  | 0.020702000  | 6                         | -1.297837000 | 2.988655000  | 0.698424000  |
| 1                          | -2.411198000 | 2.404776000  | 0.370815000  | 1                         | -1.680387000 | 2.421819000  | 1.541503000  |
| 1                          | -1.567203000 | 3.923868000  | 0.709397000  | 1                         | -0.982814000 | 3.972191000  | 1.071002000  |
| 1                          | -1.914584000 | 3.460421000  | -0.967271000 | 1                         | -2.117941000 | 3.158538000  | -0.015140000 |
| 17                         | 5.548141000  | -0.792889000 | 0.018101000  | 17                        | 5.791785000  | -0.792439000 | 0.035439000  |
| E= -2475.39517754 Hartrees |              |              |              | E=-2475.43914816 Hartrees |              |              |              |
| <b>1e</b>                  |              |              |              | <b>1e'</b>                |              |              |              |
| 24                         | -2.141614000 | -0.557206000 | 0.013140000  | 24                        | -2.241713000 | -0.578728000 | 0.045077000  |
| 6                          | -3.330964000 | 0.200460000  | -1.272079000 | 6                         | -3.681031000 | 0.475998000  | -0.583785000 |
| 8                          | -4.064335000 | 0.591787000  | -2.064933000 | 8                         | -4.637759000 | 0.995323000  | -0.974128000 |
| 6                          | -3.302363000 | -2.039117000 | 0.100454000  | 6                         | -3.493683000 | -1.948244000 | 0.057175000  |
| 8                          | -4.019330000 | -2.936137000 | 0.153546000  | 8                         | -4.278750000 | -2.803388000 | 0.056313000  |
| 6                          | -0.996868000 | -1.475786000 | 1.249227000  | 6                         | -1.048143000 | -1.910958000 | 0.724844000  |
| 8                          | -0.368467000 | -2.089109000 | 1.984736000  | 8                         | -0.463234000 | -2.795990000 | 1.170574000  |
| 6                          | -3.064437000 | 0.212828000  | 1.497588000  | 6                         | -2.553094000 | -0.046360000 | 1.838965000  |
| 8                          | -3.620201000 | 0.641374000  | 2.406484000  | 8                         | -2.735295000 | 0.276623000  | 2.931682000  |
| 6                          | -1.226499000 | -1.414342000 | -1.433009000 | 6                         | -1.720331000 | -0.828343000 | -1.766667000 |
| 8                          | -0.725932000 | -1.974747000 | -2.299219000 | 8                         | -1.429062000 | -0.940909000 | -2.876484000 |
| 6                          | -0.792154000 | 1.123115000  | -0.075263000 | 6                         | -0.659553000 | 1.005308000  | -0.056047000 |
| 7                          | -1.037658000 | 2.417674000  | -0.170637000 | 7                         | -0.954074000 | 2.362122000  | -0.129116000 |
| 6                          | 0.663318000  | 0.791332000  | 0.000357000  | 6                         | 0.751190000  | 0.725086000  | -0.034994000 |
| 6                          | 1.317121000  | 0.798473000  | 1.242114000  | 6                         | 1.677375000  | 1.636582000  | 0.581132000  |
| 6                          | 1.394015000  | 0.447028000  | -1.145120000 | 6                         | 1.342190000  | -0.464878000 | -0.562298000 |
| 6                          | 2.663602000  | 0.473315000  | 1.332754000  | 6                         | 3.026353000  | 1.384851000  | 0.657104000  |
| 1                          | 0.764081000  | 1.048514000  | 2.141883000  | 1                         | 1.284224000  | 2.531157000  | 1.052162000  |
| 6                          | 2.743460000  | 0.124690000  | -1.053387000 | 6                         | 2.697627000  | -0.704956000 | -0.510796000 |
| 1                          | 0.906611000  | 0.429965000  | -2.113641000 | 1                         | 0.713155000  | -1.190793000 | -1.058850000 |
| 6                          | 3.391308000  | 0.135361000  | 0.186644000  | 6                         | 3.588097000  | 0.210870000  | 0.099205000  |
| 1                          | 3.167724000  | 0.475191000  | 2.292180000  | 1                         | 3.685073000  | 2.082772000  | 1.163893000  |
| 1                          | 3.296751000  | -0.138573000 | -1.946126000 | 1                         | 3.092864000  | -1.613712000 | -0.949899000 |
| 6                          | -0.016276000 | 3.483157000  | -0.276830000 | 6                         | -0.238662000 | 3.271139000  | -1.021826000 |
| 1                          | -0.281319000 | 4.139372000  | -1.108508000 | 1                         | -0.925484000 | 3.637954000  | -1.799896000 |
| 1                          | -0.006142000 | 4.075005000  | 0.641728000  | 1                         | 0.153497000  | 4.146687000  | -0.487941000 |
| 1                          | 0.969942000  | 3.068193000  | -0.447336000 | 1                         | 0.591094000  | 2.764258000  | -1.505555000 |
| 6                          | -2.389898000 | 2.991447000  | -0.203181000 | 6                         | -2.185209000 | 2.958763000  | 0.350158000  |

|                           |              |              |              |                           |              |              |              |
|---------------------------|--------------|--------------|--------------|---------------------------|--------------|--------------|--------------|
| 1                         | -3.118810000 | 2.274335000  | 0.147269000  | 1                         | -2.656657000 | 2.331549000  | 1.097591000  |
| 1                         | -2.415438000 | 3.871959000  | 0.441851000  | 1                         | -1.957660000 | 3.926354000  | 0.816679000  |
| 1                         | -2.640357000 | 3.298532000  | -1.221574000 | 1                         | -2.902390000 | 3.146430000  | -0.461466000 |
| 6                         | 4.833139000  | -0.201750000 | 0.342646000  | 6                         | 5.022251000  | -0.000612000 | 0.188352000  |
| 8                         | 5.429825000  | -0.185884000 | 1.395285000  | 8                         | 5.839339000  | 0.753681000  | 0.699408000  |
| 8                         | 5.416731000  | -0.529550000 | -0.830856000 | 8                         | 5.426916000  | -1.191045000 | -0.380403000 |
| 6                         | 6.810395000  | -0.875162000 | -0.763911000 | 6                         | 6.823597000  | -1.456141000 | -0.316751000 |
| 1                         | 6.957635000  | -1.740615000 | -0.117366000 | 1                         | 7.170552000  | -1.501544000 | 0.718368000  |
| 1                         | 7.100714000  | -1.107307000 | -1.785906000 | 1                         | 6.963200000  | -2.422526000 | -0.801513000 |
| 1                         | 7.393217000  | -0.037509000 | -0.379721000 | 1                         | 7.397080000  | -0.686956000 | -0.839920000 |
| E=-2243.71642831 Hartrees |              |              |              | E=-2243.76806073 Hartrees |              |              |              |
| <b>1f</b>                 |              |              |              | <b>1f'</b>                |              |              |              |
| 24                        | -2.126201000 | -0.522859000 | 0.013450000  | 24                        | -2.265236000 | -0.515832000 | 0.022431000  |
| 6                         | -3.344868000 | 0.333452000  | -1.181150000 | 6                         | -3.646913000 | 0.669976000  | -0.495104000 |
| 8                         | -4.097336000 | 0.786284000  | -1.921103000 | 8                         | -4.580799000 | 1.267352000  | -0.824713000 |
| 6                         | -3.314240000 | -1.986558000 | 0.056090000  | 6                         | -3.598850000 | -1.800831000 | -0.072135000 |
| 8                         | -4.046003000 | -2.872193000 | 0.083039000  | 8                         | -4.434167000 | -2.604553000 | -0.140818000 |
| 6                         | -0.960989000 | -1.533066000 | 1.153141000  | 6                         | -1.164612000 | -1.973286000 | 0.581464000  |
| 8                         | -0.319332000 | -2.196657000 | 1.831707000  | 8                         | -0.638916000 | -2.929264000 | 0.950933000  |
| 6                         | -2.980853000 | 0.175338000  | 1.572986000  | 6                         | -2.527285000 | -0.110971000 | 1.855850000  |
| 8                         | -3.494609000 | 0.559262000  | 2.525303000  | 8                         | -2.678284000 | 0.134045000  | 2.973599000  |
| 6                         | -1.279059000 | -1.310345000 | -1.511946000 | 6                         | -1.757456000 | -0.627830000 | -1.805988000 |
| 8                         | -0.816896000 | -1.825718000 | -2.425951000 | 8                         | -1.465576000 | -0.652216000 | -2.921558000 |
| 6                         | -0.744508000 | 1.131441000  | -0.027333000 | 6                         | -0.586293000 | 0.973437000  | 0.021862000  |
| 7                         | -0.962211000 | 2.434499000  | -0.034569000 | 7                         | -0.788534000 | 2.359945000  | 0.067544000  |
| 6                         | 0.705976000  | 0.765312000  | -0.031854000 | 6                         | 0.808799000  | 0.615713000  | -0.019458000 |
| 6                         | 1.405440000  | 0.669491000  | 1.178225000  | 6                         | 1.806477000  | 1.457094000  | 0.580164000  |
| 6                         | 1.385006000  | 0.488177000  | -1.226411000 | 6                         | 1.313831000  | -0.582943000 | -0.608556000 |
| 6                         | 2.747919000  | 0.306791000  | 1.196744000  | 6                         | 3.146618000  | 1.134840000  | 0.588842000  |
| 1                         | 0.895091000  | 0.868972000  | 2.114738000  | 1                         | 1.480510000  | 2.360736000  | 1.082801000  |
| 6                         | 2.728266000  | 0.131759000  | -1.210254000 | 6                         | 2.658601000  | -0.898105000 | -0.616745000 |
| 1                         | 0.863375000  | 0.552036000  | -2.174700000 | 1                         | 0.630440000  | -1.259090000 | -1.102017000 |
| 6                         | 3.415381000  | 0.041613000  | 0.001697000  | 6                         | 3.607158000  | -0.045052000 | -0.026323000 |
| 1                         | 3.273340000  | 0.236205000  | 2.141553000  | 1                         | 3.852942000  | 1.797407000  | 1.080404000  |
| 1                         | 3.240578000  | -0.073056000 | -2.143504000 | 1                         | 2.985214000  | -1.813067000 | -1.099666000 |
| 6                         | 0.078153000  | 3.484124000  | -0.111317000 | 6                         | -0.159948000 | 3.237632000  | -0.916690000 |
| 1                         | -0.209981000 | 4.206092000  | -0.878056000 | 1                         | -0.876261000 | 3.492281000  | -1.715111000 |
| 1                         | 0.145307000  | 4.005429000  | 0.846754000  | 1                         | 0.170047000  | 4.177550000  | -0.455645000 |
| 1                         | 1.045639000  | 3.064675000  | -0.360262000 | 1                         | 0.701544000  | 2.757555000  | -1.372347000 |
| 6                         | -2.301216000 | 3.036718000  | 0.023694000  | 6                         | -1.970928000 | 2.975447000  | 0.635325000  |
| 1                         | -3.034582000 | 2.308099000  | 0.338858000  | 1                         | -2.400224000 | 2.349785000  | 1.410247000  |
| 1                         | -2.286529000 | 3.862616000  | 0.737667000  | 1                         | -1.690561000 | 3.933553000  | 1.092470000  |
| 1                         | -2.575718000 | 3.429676000  | -0.958295000 | 1                         | -2.743693000 | 3.187459000  | -0.118089000 |
| 6                         | 4.855101000  | -0.390693000 | 0.008718000  | 6                         | 5.040596000  | -0.407225000 | 0.026021000  |
| 9                         | 5.552815000  | 0.155513000  | -1.016062000 | 9                         | 5.412393000  | -1.278897000 | -0.951004000 |
| 9                         | 5.490236000  | -0.044965000 | 1.150484000  | 9                         | 5.871175000  | 0.672871000  | -0.085500000 |
| 9                         | 4.982296000  | -1.735299000 | -0.116169000 | 9                         | 5.420721000  | -1.011097000 | 1.204848000  |
| E=-2352.92183976 Hartrees |              |              |              | E=-2352.97357412 Hartrees |              |              |              |
| <b>2a</b>                 |              |              |              | <b>2a'</b>                |              |              |              |



|    |              |              |              |    |              |              |              |
|----|--------------|--------------|--------------|----|--------------|--------------|--------------|
| 24 | -1.851265000 | -0.629356000 | 0.069996000  | 24 | -1.979225000 | -0.590816000 | -0.002116000 |
| 6  | -1.660867000 | -1.585889000 | -1.567853000 | 6  | -1.689364000 | -0.861670000 | -1.853333000 |
| 8  | -1.515047000 | -2.189045000 | -2.537298000 | 8  | -1.464154000 | -1.049876000 | -2.973062000 |
| 6  | -3.299020000 | -1.725396000 | 0.576449000  | 6  | -3.544978000 | -1.574816000 | 0.044473000  |
| 8  | -4.172617000 | -2.405040000 | 0.898680000  | 8  | -4.520818000 | -2.213479000 | 0.073362000  |
| 6  | -1.936172000 | 0.287277000  | 1.739050000  | 6  | -1.905758000 | -0.274987000 | 1.867478000  |
| 8  | -1.951615000 | 0.798706000  | 2.770393000  | 8  | -1.804127000 | -0.149032000 | 3.012680000  |
| 6  | -0.725257000 | -1.887317000 | 0.877504000  | 6  | -1.128080000 | -2.194991000 | 0.374289000  |
| 8  | -0.071769000 | -2.687837000 | 1.384003000  | 8  | -0.700302000 | -3.240835000 | 0.635481000  |
| 6  | -0.194052000 | 0.594208000  | -0.367415000 | 6  | -0.088630000 | 0.584244000  | -0.047093000 |
| 7  | -0.398399000 | 1.849610000  | -0.736849000 | 7  | -0.225278000 | 1.997381000  | 0.077975000  |
| 6  | 1.221006000  | 0.175632000  | -0.187454000 | 6  | 1.263205000  | 0.094869000  | 0.021641000  |
| 6  | 1.983676000  | 0.628144000  | 0.903527000  | 6  | 2.308151000  | 0.806029000  | 0.695780000  |
| 6  | 1.806773000  | -0.742809000 | -1.062076000 | 6  | 1.662368000  | -1.136700000 | -0.563109000 |
| 6  | 3.280302000  | 0.180793000  | 1.102908000  | 6  | 3.604034000  | 0.326574000  | 0.773867000  |
| 1  | 1.548862000  | 1.322903000  | 1.614335000  | 1  | 2.063724000  | 1.733416000  | 1.200810000  |
| 6  | 3.120769000  | -1.177573000 | -0.886685000 | 6  | 2.965845000  | -1.617711000 | -0.495683000 |
| 1  | 1.235121000  | -1.130931000 | -1.898120000 | 1  | 0.929478000  | -1.720163000 | -1.104923000 |
| 6  | 3.864367000  | -0.720486000 | 0.204096000  | 6  | 3.954234000  | -0.888491000 | 0.173449000  |
| 1  | 3.860355000  | 0.514455000  | 1.956337000  | 1  | 4.366762000  | 0.878618000  | 1.316700000  |
| 1  | 3.538401000  | -1.881516000 | -1.595311000 | 1  | 3.194301000  | -2.563789000 | -0.973974000 |
| 6  | 0.667804000  | 4.000554000  | -0.037186000 | 6  | 1.007806000  | 4.150682000  | -0.132597000 |
| 1  | -0.264901000 | 4.532184000  | 0.141996000  | 1  | 0.232935000  | 4.723242000  | 0.376306000  |
| 6  | -2.650727000 | 1.098074000  | -1.256866000 | 6  | -2.542747000 | 1.591712000  | -0.600470000 |
| 1  | -2.523071000 | 0.774017000  | -2.285123000 | 1  | -2.384350000 | 1.654369000  | -1.673500000 |
| 6  | -1.808254000 | 2.271919000  | -0.852960000 | 6  | -1.611811000 | 2.424079000  | 0.242315000  |
| 1  | -1.864326000 | 3.075404000  | -1.596229000 | 1  | -1.695143000 | 3.483276000  | -0.036732000 |
| 1  | -2.142818000 | 2.685120000  | 0.104584000  | 1  | -1.909468000 | 2.356910000  | 1.294655000  |
| 6  | 0.624369000  | 2.881185000  | -1.043449000 | 6  | 0.563063000  | 2.877494000  | -0.805075000 |
| 1  | 1.592321000  | 2.392130000  | -1.121500000 | 1  | 1.432598000  | 2.327458000  | -1.159862000 |
| 1  | 0.373447000  | 3.282947000  | -2.032655000 | 1  | -0.030493000 | 3.133801000  | -1.703221000 |
| 6  | 1.771393000  | 4.386321000  | 0.596837000  | 6  | 2.256995000  | 4.612770000  | -0.127352000 |
| 1  | 2.723681000  | 3.885577000  | 0.447536000  | 1  | 3.068025000  | 4.068210000  | -0.603772000 |
| 6  | -3.747945000 | 0.667041000  | -0.558371000 | 6  | -3.706956000 | 1.036715000  | -0.138099000 |
| 1  | -4.073712000 | 1.165952000  | 0.347065000  | 1  | -4.027928000 | 1.182181000  | 0.887717000  |
| 1  | 1.764192000  | 5.221207000  | 1.289505000  | 1  | 2.519963000  | 5.544795000  | 0.365182000  |
| 1  | -4.481385000 | 0.023448000  | -1.026876000 | 1  | -4.473819000 | 0.694589000  | -0.822526000 |
| 8  | 5.145649000  | -1.092921000 | 0.481496000  | 8  | 5.281359000  | -1.275658000 | 0.295773000  |
| 6  | 5.778107000  | -2.039898000 | -0.367736000 | 6  | 5.655020000  | -2.513838000 | -0.263154000 |
| 1  | 5.870970000  | -1.660576000 | -1.390845000 | 1  | 5.508567000  | -2.532605000 | -1.350946000 |
| 1  | 6.771414000  | -2.195679000 | 0.048863000  | 1  | 6.716729000  | -2.639546000 | -0.045693000 |
| 1  | 5.236153000  | -2.990941000 | -0.377651000 | 1  | 5.096418000  | -3.347586000 | 0.180906000  |

E=-2171.77206667 Hartrees

**2b**

|    |              |              |              |
|----|--------------|--------------|--------------|
| 24 | -1.704409000 | -0.417679000 | 0.075968000  |
| 6  | -1.722849000 | -1.326733000 | -1.601365000 |
| 8  | -1.708318000 | -1.904135000 | -2.596334000 |
| 6  | -3.312153000 | -1.261395000 | 0.586487000  |
| 8  | -4.284295000 | -1.788737000 | 0.911164000  |
| 6  | -1.585799000 | 0.434222000  | 1.775977000  |

E=-2171.79916958 Hartrees

**2b'**

|    |              |              |              |
|----|--------------|--------------|--------------|
| 24 | -1.848675000 | -0.310264000 | 0.006993000  |
| 6  | -1.689049000 | -0.676958000 | -1.844504000 |
| 8  | -1.558130000 | -0.933420000 | -2.965293000 |
| 6  | -3.583707000 | -0.943132000 | 0.115807000  |
| 8  | -4.671027000 | -1.359369000 | 0.185775000  |
| 6  | -1.679852000 | 0.014251000  | 1.869045000  |

|                            |              |              |              |                            |              |              |              |
|----------------------------|--------------|--------------|--------------|----------------------------|--------------|--------------|--------------|
| 8                          | -1.484532000 | 0.901836000  | 2.823329000  | 8                          | -1.541526000 | 0.132733000  | 3.011077000  |
| 6                          | -0.802045000 | -1.888675000 | 0.801255000  | 6                          | -1.334224000 | -2.050202000 | 0.400903000  |
| 8                          | -0.291399000 | -2.814221000 | 1.255919000  | 8                          | -1.124425000 | -3.156097000 | 0.676222000  |
| 6                          | 0.124963000  | 0.511249000  | -0.373012000 | 6                          | 0.244870000  | 0.440852000  | -0.091747000 |
| 7                          | 0.142414000  | 1.790214000  | -0.710201000 | 7                          | 0.402452000  | 1.846487000  | 0.039464000  |
| 6                          | 1.445830000  | -0.162208000 | -0.250171000 | 6                          | 1.459103000  | -0.326146000 | -0.042959000 |
| 6                          | 2.225886000  | -0.013883000 | 0.904316000  | 6                          | 2.640084000  | 0.128782000  | 0.623724000  |
| 6                          | 1.907579000  | -1.014481000 | -1.260402000 | 6                          | 1.572118000  | -1.612146000 | -0.649242000 |
| 6                          | 3.431613000  | -0.697010000 | 1.036289000  | 6                          | 3.800413000  | -0.632832000 | 0.672980000  |
| 1                          | 1.883160000  | 0.628590000  | 1.709002000  | 1                          | 2.611286000  | 1.077012000  | 1.148564000  |
| 6                          | 3.123910000  | -1.678449000 | -1.124790000 | 6                          | 2.739504000  | -2.352170000 | -0.603839000 |
| 1                          | 1.313103000  | -1.163030000 | -2.156046000 | 1                          | 0.720630000  | -2.010654000 | -1.186188000 |
| 6                          | 3.905933000  | -1.540503000 | 0.026321000  | 6                          | 3.892370000  | -1.888562000 | 0.058360000  |
| 1                          | 4.011561000  | -0.573109000 | 1.946841000  | 1                          | 4.659423000  | -0.244533000 | 1.219634000  |
| 1                          | 3.462129000  | -2.328008000 | -1.927373000 | 1                          | 2.763200000  | -3.322664000 | -1.097561000 |
| 6                          | 1.566772000  | 3.699995000  | 0.041743000  | 6                          | 2.072820000  | 3.690314000  | -0.074248000 |
| 1                          | 0.758349000  | 4.410475000  | 0.203651000  | 1                          | 1.424233000  | 4.396848000  | 0.442823000  |
| 6                          | -2.221063000 | 1.470511000  | -1.178281000 | 6                          | -1.949864000 | 1.924351000  | -0.624398000 |
| 1                          | -2.185371000 | 1.161114000  | -2.218206000 | 1                          | -1.786575000 | 1.935722000  | -1.698488000 |
| 6                          | -1.170282000 | 2.462415000  | -0.775846000 | 6                          | -0.862092000 | 2.559786000  | 0.200606000  |
| 1                          | -1.099142000 | 3.281786000  | -1.500270000 | 1                          | -0.721973000 | 3.607026000  | -0.100521000 |
| 1                          | -1.398509000 | 2.902982000  | 0.200283000  | 1                          | -1.161213000 | 2.578066000  | 1.254932000  |
| 6                          | 1.332944000  | 2.631203000  | -0.993083000 | 6                          | 1.385755000  | 2.559316000  | -0.795400000 |
| 1                          | 2.199150000  | 1.979551000  | -1.076105000 | 1                          | 2.126920000  | 1.846187000  | -1.150287000 |
| 1                          | 1.165479000  | 3.092187000  | -1.973897000 | 1                          | 0.882786000  | 2.961607000  | -1.694961000 |
| 6                          | 2.700655000  | 3.834167000  | 0.723649000  | 6                          | 3.390530000  | 3.880983000  | -0.038446000 |
| 1                          | 3.532973000  | 3.148709000  | 0.592617000  | 1                          | 4.078983000  | 3.192980000  | -0.522079000 |
| 6                          | -3.355744000 | 1.219329000  | -0.452533000 | 6                          | -3.202519000 | 1.632202000  | -0.150772000 |
| 1                          | -3.560969000 | 1.738604000  | 0.476544000  | 1                          | -3.483280000 | 1.861075000  | 0.871632000  |
| 1                          | 2.839887000  | 4.637719000  | 1.439072000  | 1                          | 3.832437000  | 4.722760000  | 0.487403000  |
| 1                          | -4.205682000 | 0.731145000  | -0.911809000 | 1                          | -4.025743000 | 1.444754000  | -0.829504000 |
| 6                          | 5.194441000  | -2.307512000 | 0.192288000  | 6                          | 5.154208000  | -2.713187000 | 0.105921000  |
| 1                          | 5.016761000  | -3.275910000 | 0.672719000  | 1                          | 4.989951000  | -3.692736000 | 0.573248000  |
| 1                          | 5.671729000  | -2.507004000 | -0.770208000 | 1                          | 5.560839000  | -2.908571000 | -0.895414000 |
| 1                          | 5.909115000  | -1.764410000 | 0.815670000  | 1                          | 5.937188000  | -2.207729000 | 0.679691000  |
| E= -2096.54304675 Hartrees |              |              |              | E= -2096.57188183 Hartrees |              |              |              |

|           |              |              |              |            |              |              |              |
|-----------|--------------|--------------|--------------|------------|--------------|--------------|--------------|
| <b>2c</b> |              |              |              | <b>2c'</b> |              |              |              |
| 24        | -1.554174000 | -0.084974000 | 0.067861000  | 24         | 1.670461000  | -0.023130000 | 0.005576000  |
| 6         | -1.788499000 | -1.022021000 | -1.577834000 | 6          | 1.610153000  | 0.416775000  | -1.835639000 |
| 8         | -1.913273000 | -1.623103000 | -2.550680000 | 8          | 1.549041000  | 0.723021000  | -2.949818000 |
| 6         | -3.346402000 | -0.424816000 | 0.550230000  | 6          | 3.512656000  | 0.113376000  | 0.111567000  |
| 8         | -4.434783000 | -0.646246000 | 0.857538000  | 8          | 4.672328000  | 0.217114000  | 0.179240000  |
| 6         | -1.243612000 | 0.765183000  | 1.745576000  | 6          | 1.430644000  | -0.340727000 | 1.861272000  |
| 8         | -1.043335000 | 1.224638000  | 2.782094000  | 8          | 1.274589000  | -0.451165000 | 3.001793000  |
| 6         | -1.116933000 | -1.719019000 | 0.869927000  | 6          | 1.642833000  | 1.781263000  | 0.446131000  |
| 8         | -0.896000000 | -2.730513000 | 1.371798000  | 8          | 1.736362000  | 2.895123000  | 0.750326000  |
| 6         | 0.468021000  | 0.275467000  | -0.358727000 | 6          | -0.547648000 | -0.169647000 | -0.094794000 |
| 7         | 0.854262000  | 1.484395000  | -0.730095000 | 7          | -1.082449000 | -1.479580000 | 0.010801000  |
| 6         | 1.541879000  | -0.742287000 | -0.197558000 | 6          | -1.503958000 | 0.900972000  | -0.024438000 |
| 6         | 2.298140000  | -0.806309000 | 0.981097000  | 6          | -2.756223000 | 0.774237000  | 0.660516000  |

|   |              |              |              |   |              |              |              |
|---|--------------|--------------|--------------|---|--------------|--------------|--------------|
| 6 | 1.769606000  | -1.691724000 | -1.202695000 | 6 | -1.264679000 | 2.173043000  | -0.624073000 |
| 6 | 3.265174000  | -1.795526000 | 1.144628000  | 6 | -3.667895000 | 1.817510000  | 0.728975000  |
| 1 | 2.119640000  | -0.088900000 | 1.775407000  | 1 | -2.973716000 | -0.152350000 | 1.179808000  |
| 6 | 2.748362000  | -2.669589000 | -1.039393000 | 6 | -2.188054000 | 3.203363000  | -0.563248000 |
| 1 | 1.175174000  | -1.670116000 | -2.110189000 | 1 | -0.341414000 | 2.326432000  | -1.168428000 |
| 6 | 3.498116000  | -2.727167000 | 0.134209000  | 6 | -3.408279000 | 3.047169000  | 0.111443000  |
| 1 | 3.834600000  | -1.839713000 | 2.067664000  | 1 | -4.593182000 | 1.676669000  | 1.284984000  |
| 1 | 2.915295000  | -3.395678000 | -1.828649000 | 1 | -1.957373000 | 4.148288000  | -1.050176000 |
| 6 | 2.751076000  | 2.920005000  | 0.029258000  | 6 | -3.206374000 | -2.778250000 | -0.081234000 |
| 1 | 2.176699000  | 3.834443000  | 0.165083000  | 1 | -2.775009000 | -3.647944000 | 0.413699000  |
| 6 | -1.491548000 | 1.827195000  | -1.257265000 | 6 | 1.156191000  | -2.181058000 | -0.676739000 |
| 1 | -1.520373000 | 1.481168000  | -2.285870000 | 1 | 0.995410000  | -2.123208000 | -1.749697000 |
| 6 | -0.213435000 | 2.497452000  | -0.848961000 | 6 | -0.063466000 | -2.518170000 | 0.139765000  |
| 1 | 0.100866000  | 3.240348000  | -1.590737000 | 1 | -0.487087000 | -3.476068000 | -0.191825000 |
| 1 | -0.329034000 | 3.014390000  | 0.109288000  | 1 | 0.220176000  | -2.652197000 | 1.189988000  |
| 6 | 2.240148000  | 1.945343000  | -0.998732000 | 6 | -2.240817000 | -1.878052000 | -0.808550000 |
| 1 | 2.885762000  | 1.072454000  | -1.056584000 | 1 | -2.756887000 | -0.981771000 | -1.146590000 |
| 1 | 2.227737000  | 2.417558000  | -1.988195000 | 1 | -1.885900000 | -2.397177000 | -1.718692000 |
| 6 | 3.862641000  | 2.734643000  | 0.735412000  | 6 | -4.522891000 | -2.587385000 | -0.015505000 |
| 1 | 4.465847000  | 1.837572000  | 0.629460000  | 1 | -4.996920000 | -1.724629000 | -0.475974000 |
| 6 | -2.667188000 | 1.928793000  | -0.561542000 | 6 | 2.442027000  | -2.254364000 | -0.206387000 |
| 1 | -2.739835000 | 2.516236000  | 0.346468000  | 1 | 2.651108000  | -2.576064000 | 0.808203000  |
| 1 | 4.212946000  | 3.475759000  | 1.445986000  | 1 | -5.174898000 | -3.277015000 | 0.513336000  |
| 1 | -3.608751000 | 1.679910000  | -1.033890000 | 1 | 3.283948000  | -2.284640000 | -0.887442000 |
| 1 | 4.249611000  | -3.498774000 | 0.264984000  | 1 | -4.126048000 | 3.860791000  | 0.162662000  |

E=-2057.21763422 Hartrees

E=-2057.24778979 Hartrees

**2d**

|    |              |              |              |
|----|--------------|--------------|--------------|
| 24 | -1.862431000 | -0.582738000 | 0.076292000  |
| 6  | -1.728247000 | -1.503068000 | -1.590514000 |
| 8  | -1.614564000 | -2.082271000 | -2.577633000 |
| 6  | -3.338174000 | -1.648514000 | 0.578460000  |
| 8  | -4.225920000 | -2.309739000 | 0.897084000  |
| 6  | -1.895173000 | 0.290952000  | 1.770398000  |
| 8  | -1.880379000 | 0.775425000  | 2.814519000  |
| 6  | -0.764013000 | -1.897923000 | 0.828691000  |
| 8  | -0.125047000 | -2.730432000 | 1.300334000  |
| 6  | -0.187509000 | 0.592773000  | -0.373222000 |
| 7  | -0.344819000 | 1.859151000  | -0.719988000 |
| 6  | 1.215046000  | 0.107608000  | -0.257890000 |
| 6  | 1.955873000  | 0.316136000  | 0.912887000  |
| 6  | 1.794910000  | -0.630294000 | -1.297797000 |
| 6  | 3.247091000  | -0.188761000 | 1.039733000  |
| 1  | 1.519553000  | 0.866121000  | 1.739879000  |
| 6  | 3.090910000  | -1.126795000 | -1.185098000 |
| 1  | 1.230262000  | -0.827943000 | -2.202758000 |
| 6  | 3.808541000  | -0.901217000 | -0.015044000 |
| 1  | 3.810484000  | -0.032413000 | 1.952131000  |
| 1  | 3.533933000  | -1.692694000 | -1.996059000 |
| 6  | 0.810578000  | 3.923992000  | 0.075881000  |
| 1  | -0.087853000 | 4.509969000  | 0.259731000  |

**2d'**

|    |              |              |              |
|----|--------------|--------------|--------------|
| 24 | -2.016260000 | -0.508524000 | 0.009110000  |
| 6  | -1.805366000 | -0.855982000 | -1.841450000 |
| 8  | -1.637356000 | -1.093834000 | -2.960971000 |
| 6  | -3.633823000 | -1.402885000 | 0.119550000  |
| 8  | -4.642551000 | -1.982440000 | 0.189102000  |
| 6  | -1.911099000 | -0.151493000 | 1.870621000  |
| 8  | -1.802948000 | -0.004911000 | 3.012218000  |
| 6  | -1.236896000 | -2.144836000 | 0.415345000  |
| 8  | -0.853589000 | -3.200439000 | 0.699004000  |
| 6  | -0.065001000 | 0.551457000  | -0.100750000 |
| 7  | -0.123580000 | 1.961724000  | 0.018748000  |
| 6  | 1.250220000  | -0.020458000 | -0.054766000 |
| 6  | 2.347891000  | 0.617043000  | 0.611329000  |
| 6  | 1.555408000  | -1.277279000 | -0.658021000 |
| 6  | 3.614977000  | 0.056740000  | 0.664474000  |
| 1  | 2.171584000  | 1.547895000  | 1.137370000  |
| 6  | 2.821950000  | -1.834604000 | -0.622079000 |
| 1  | 0.775147000  | -1.805607000 | -1.190278000 |
| 6  | 3.856271000  | -1.166097000 | 0.038897000  |
| 1  | 4.412458000  | 0.558651000  | 1.203766000  |
| 1  | 3.012481000  | -2.785743000 | -1.107920000 |
| 6  | 1.270378000  | 4.025619000  | -0.060103000 |
| 1  | 0.528649000  | 4.618895000  | 0.473689000  |

|                           |              |              |              |                           |              |              |              |
|---------------------------|--------------|--------------|--------------|---------------------------|--------------|--------------|--------------|
| 6                         | -2.634896000 | 1.205246000  | -1.199086000 | 6                         | -2.462352000 | 1.681164000  | -0.632750000 |
| 1                         | -2.546169000 | 0.895388000  | -2.235790000 | 1                         | -2.309271000 | 1.711717000  | -1.707883000 |
| 6                         | -1.739107000 | 2.339702000  | -0.797138000 | 6                         | -1.479789000 | 2.480238000  | 0.180929000  |
| 1                         | -1.779485000 | 3.156020000  | -1.527014000 | 1                         | -1.497407000 | 3.532944000  | -0.132177000 |
| 1                         | -2.033350000 | 2.749882000  | 0.174645000  | 1                         | -1.774428000 | 2.466315000  | 1.236466000  |
| 6                         | 0.719431000  | 2.860253000  | -0.986152000 | 6                         | 0.750374000  | 2.820688000  | -0.801112000 |
| 1                         | 1.665934000  | 2.334642000  | -1.087268000 | 1                         | 1.583727000  | 2.226171000  | -1.170081000 |
| 1                         | 0.486315000  | 3.317280000  | -1.954980000 | 1                         | 0.192614000  | 3.162723000  | -1.692477000 |
| 6                         | 1.920047000  | 4.196171000  | 0.756752000  | 6                         | 2.546166000  | 4.406191000  | -0.026811000 |
| 1                         | 2.839440000  | 3.638568000  | 0.602764000  | 1                         | 3.324191000  | 3.836943000  | -0.528642000 |
| 6                         | -3.727457000 | 0.799276000  | -0.479827000 | 6                         | -3.652624000 | 1.204148000  | -0.149146000 |
| 1                         | -4.012180000 | 1.289868000  | 0.443759000  | 1                         | -3.958026000 | 1.392628000  | 0.874357000  |
| 1                         | 1.951870000  | 4.992156000  | 1.493061000  | 1                         | 2.864114000  | 5.293347000  | 0.513468000  |
| 1                         | -4.493933000 | 0.189502000  | -0.940602000 | 1                         | -4.442307000 | 0.890535000  | -0.821081000 |
| 17                        | 5.441615000  | -1.532457000 | 0.136870000  | 17                        | 5.486072000  | -1.874108000 | 0.077752000  |
| E=-2516.84148927 Hartrees |              |              |              | E=-2516.87925951 Hartrees |              |              |              |
| <b>2e</b>                 |              |              |              | <b>2e'</b>                |              |              |              |
| 24                        | -2.205272000 | -0.797065000 | 0.084581000  | 24                        | -2.321285000 | -0.790840000 | 0.039825000  |
| 6                         | -1.897076000 | -1.729610000 | -1.551688000 | 6                         | -2.015766000 | -1.410804000 | -1.726330000 |
| 8                         | -1.676097000 | -2.308308000 | -2.520669000 | 8                         | -1.809584000 | -1.808945000 | -2.791467000 |
| 6                         | -3.491778000 | -2.076421000 | 0.607324000  | 6                         | -3.699579000 | -2.000665000 | 0.312918000  |
| 8                         | -4.262466000 | -2.865790000 | 0.938670000  | 8                         | -4.554309000 | -2.771520000 | 0.486135000  |
| 6                         | -2.404329000 | 0.115731000  | 1.747077000  | 6                         | -2.411793000 | -0.132360000 | 1.819518000  |
| 8                         | -2.483846000 | 0.633595000  | 2.771797000  | 8                         | -2.429092000 | 0.206644000  | 2.923866000  |
| 6                         | -0.918701000 | -1.894254000 | 0.888649000  | 6                         | -1.191189000 | -2.111271000 | 0.715540000  |
| 8                         | -0.163187000 | -2.601955000 | 1.390480000  | 8                         | -0.582201000 | -2.980469000 | 1.172342000  |
| 6                         | -0.746398000 | 0.631452000  | -0.391732000 | 6                         | -0.642881000 | 0.636634000  | -0.218098000 |
| 7                         | -1.108917000 | 1.837794000  | -0.791009000 | 7                         | -1.023952000 | 1.971720000  | -0.300054000 |
| 6                         | 0.711093000  | 0.390388000  | -0.231999000 | 6                         | 0.754202000  | 0.353169000  | -0.104758000 |
| 6                         | 1.373502000  | 0.759448000  | 0.948815000  | 6                         | 1.681568000  | 1.232262000  | 0.556007000  |
| 6                         | 1.431603000  | -0.274073000 | -1.234365000 | 6                         | 1.323634000  | -0.855295000 | -0.617851000 |
| 6                         | 2.723001000  | 0.478591000  | 1.114832000  | 6                         | 3.021744000  | 0.943501000  | 0.659088000  |
| 1                         | 0.825949000  | 1.257473000  | 1.741781000  | 1                         | 1.301926000  | 2.122261000  | 1.044404000  |
| 6                         | 2.784689000  | -0.546923000 | -1.069192000 | 6                         | 2.669924000  | -1.127341000 | -0.542974000 |
| 1                         | 0.928752000  | -0.587177000 | -2.143106000 | 1                         | 0.675897000  | -1.560702000 | -1.123360000 |
| 6                         | 3.443047000  | -0.172583000 | 0.107316000  | 6                         | 3.571036000  | -0.232592000 | 0.091233000  |
| 1                         | 3.235803000  | 0.757536000  | 2.028071000  | 1                         | 3.683969000  | 1.613744000  | 1.197967000  |
| 1                         | 3.331476000  | -1.059173000 | -1.850911000 | 1                         | 3.053235000  | -2.043188000 | -0.977779000 |
| 6                         | -0.331221000 | 4.096797000  | -0.063716000 | 6                         | -0.074417000 | 4.274343000  | -0.103148000 |
| 1                         | -1.315053000 | 4.541474000  | 0.073142000  | 1                         | -0.987927000 | 4.671255000  | 0.338621000  |
| 6                         | -3.251493000 | 0.790710000  | -1.262469000 | 6                         | -3.197122000 | 1.096529000  | -0.949831000 |
| 1                         | -3.103384000 | 0.463012000  | -2.286693000 | 1                         | -2.997092000 | 0.998078000  | -2.012978000 |
| 6                         | -2.562856000 | 2.073069000  | -0.899712000 | 6                         | -2.464408000 | 2.217357000  | -0.268069000 |
| 1                         | -2.728382000 | 2.842908000  | -1.661728000 | 1                         | -2.668573000 | 3.169565000  | -0.776887000 |
| 1                         | -2.936434000 | 2.463554000  | 0.052788000  | 1                         | -2.822595000 | 2.330991000  | 0.762801000  |
| 6                         | -0.222326000 | 2.993399000  | -1.082939000 | 6                         | -0.229928000 | 3.031791000  | -0.942467000 |
| 1                         | 0.800677000  | 2.630660000  | -1.149492000 | 1                         | 0.745063000  | 2.632508000  | -1.211541000 |
| 1                         | -0.508851000 | 3.367307000  | -2.072768000 | 1                         | -0.731424000 | 3.307375000  | -1.886332000 |
| 6                         | 0.700552000  | 4.562862000  | 0.634015000  | 6                         | 1.076211000  | 4.909649000  | 0.109168000  |
| 1                         | 1.699397000  | 4.149522000  | 0.527835000  | 1                         | 2.015174000  | 4.541942000  | -0.295365000 |

|                            |              |              |              |                            |              |              |              |
|----------------------------|--------------|--------------|--------------|----------------------------|--------------|--------------|--------------|
| 6                          | -4.267971000 | 0.236108000  | -0.530933000 | 6                          | -4.281557000 | 0.446253000  | -0.416862000 |
| 1                          | -4.637701000 | 0.707480000  | 0.372316000  | 1                          | -4.683029000 | 0.722937000  | 0.551879000  |
| 1                          | 0.585178000  | 5.379778000  | 1.338342000  | 1                          | 1.125538000  | 5.813842000  | 0.708797000  |
| 1                          | -4.918825000 | -0.509038000 | -0.969850000 | 1                          | -4.944028000 | -0.135264000 | -1.046290000 |
| 6                          | 4.887864000  | -0.446056000 | 0.340024000  | 6                          | 4.996763000  | -0.469571000 | 0.198802000  |
| 8                          | 5.497854000  | -0.111940000 | 1.330562000  | 8                          | 5.822767000  | 0.263092000  | 0.730579000  |
| 8                          | 5.458777000  | -1.115420000 | -0.685546000 | 8                          | 5.390591000  | -1.661517000 | -0.381263000 |
| 6                          | 6.852664000  | -1.429359000 | -0.531890000 | 6                          | 6.781093000  | -1.948364000 | -0.302266000 |
| 1                          | 7.007372000  | -2.056018000 | 0.346841000  | 1                          | 7.114118000  | -2.013394000 | 0.736574000  |
| 1                          | 7.130599000  | -1.964496000 | -1.436967000 | 1                          | 6.913474000  | -2.910232000 | -0.798462000 |
| 1                          | 7.440900000  | -0.516918000 | -0.429360000 | 1                          | 7.374217000  | -1.181236000 | -0.806738000 |
| E= -2285.16281559 Hartrees |              |              |              | E= -2285.20943975 Hartrees |              |              |              |
| <b>2f</b>                  |              |              |              | <b>2f'</b>                 |              |              |              |
| 24                         | -2.237424000 | -0.702530000 | 0.073631000  | 24                         | -2.378267000 | -0.672977000 | 0.021624000  |
| 6                          | -2.009110000 | -1.587053000 | -1.603692000 | 6                          | -2.127369000 | -1.174847000 | -1.789301000 |
| 8                          | -1.833945000 | -2.138158000 | -2.597299000 | 8                          | -1.944696000 | -1.503110000 | -2.882631000 |
| 6                          | -3.596857000 | -1.918036000 | 0.567890000  | 6                          | -3.853372000 | -1.775920000 | 0.224907000  |
| 8                          | -4.411511000 | -2.668877000 | 0.881669000  | 8                          | -4.770006000 | -2.482401000 | 0.353663000  |
| 6                          | -2.354061000 | 0.152542000  | 1.773282000  | 6                          | -2.374338000 | -0.142729000 | 1.845528000  |
| 8                          | -2.383817000 | 0.632445000  | 2.819039000  | 8                          | -2.329878000 | 0.112906000  | 2.971610000  |
| 6                          | -1.013286000 | -1.910027000 | 0.812024000  | 6                          | -1.366451000 | -2.133470000 | 0.576340000  |
| 8                          | -0.295663000 | -2.681921000 | 1.273561000  | 8                          | -0.831828000 | -3.086846000 | 0.954684000  |
| 6                          | -0.700464000 | 0.646303000  | -0.374594000 | 6                          | -0.590435000 | 0.629841000  | -0.173372000 |
| 7                          | -0.988568000 | 1.889029000  | -0.719672000 | 7                          | -0.854043000 | 2.007278000  | -0.144108000 |
| 6                          | 0.743297000  | 0.305069000  | -0.269720000 | 6                          | 0.781872000  | 0.232985000  | -0.096213000 |
| 6                          | 1.434621000  | 0.478201000  | 0.937623000  | 6                          | 1.784364000  | 1.012046000  | 0.577609000  |
| 6                          | 1.416847000  | -0.260972000 | -1.359904000 | 6                          | 1.248854000  | -0.993458000 | -0.664793000 |
| 6                          | 2.770066000  | 0.109486000  | 1.045322000  | 6                          | 3.102717000  | 0.613509000  | 0.652609000  |
| 1                          | 0.922776000  | 0.891250000  | 1.799856000  | 1                          | 1.484293000  | 1.915121000  | 1.095731000  |
| 6                          | 2.755545000  | -0.624429000 | -1.254498000 | 6                          | 2.571094000  | -1.378177000 | -0.611094000 |
| 1                          | 0.890469000  | -0.429425000 | -2.293231000 | 1                          | 0.543454000  | -1.627096000 | -1.186565000 |
| 6                          | 3.436255000  | -0.439169000 | -0.051735000 | 6                          | 3.531844000  | -0.584847000 | 0.050706000  |
| 1                          | 3.289998000  | 0.240665000  | 1.987443000  | 1                          | 3.813219000  | 1.221860000  | 1.204230000  |
| 1                          | 3.262478000  | -1.063224000 | -2.105739000 | 1                          | 2.873168000  | -2.309144000 | -1.079593000 |
| 6                          | -0.041240000 | 4.038836000  | 0.121680000  | 6                          | 0.270346000  | 4.230251000  | -0.031893000 |
| 1                          | -0.989822000 | 4.534704000  | 0.318110000  | 1                          | -0.586623000 | 4.704609000  | 0.445235000  |
| 6                          | -3.201926000 | 1.003129000  | -1.190329000 | 6                          | -3.105302000 | 1.356174000  | -0.812194000 |
| 1                          | -3.089895000 | 0.709711000  | -2.229491000 | 1                          | -2.926210000 | 1.319348000  | -1.883006000 |
| 6                          | -2.425837000 | 2.222086000  | -0.786715000 | 6                          | -2.271037000 | 2.355803000  | -0.059532000 |
| 1                          | -2.554868000 | 3.034563000  | -1.510435000 | 1                          | -2.412500000 | 3.360765000  | -0.480294000 |
| 1                          | -2.755140000 | 2.592318000  | 0.189949000  | 1                          | -2.599977000 | 2.407002000  | 0.985524000  |
| 6                          | -0.033598000 | 2.999753000  | -0.968317000 | 6                          | -0.022834000 | 2.997624000  | -0.848612000 |
| 1                          | 0.961025000  | 2.577135000  | -1.089706000 | 1                          | 0.906724000  | 2.526020000  | -1.159200000 |
| 1                          | -0.320333000 | 3.453986000  | -1.923659000 | 1                          | -0.545244000 | 3.301748000  | -1.773265000 |
| 6                          | 1.038055000  | 4.391274000  | 0.814055000  | 6                          | 1.478025000  | 4.768427000  | 0.126414000  |
| 1                          | 2.004773000  | 3.924517000  | 0.648188000  | 1                          | 2.364435000  | 4.321864000  | -0.316037000 |
| 6                          | -4.240588000 | 0.484137000  | -0.464571000 | 6                          | -4.232788000 | 0.758846000  | -0.308930000 |
| 1                          | -4.565283000 | 0.939372000  | 0.463909000  | 1                          | -4.595791000 | 0.991970000  | 0.686109000  |
| 1                          | 0.996418000  | 5.165741000  | 1.572432000  | 1                          | 1.628759000  | 5.668780000  | 0.714938000  |
| 1                          | -4.944307000 | -0.199397000 | -0.921822000 | 1                          | -4.949484000 | 0.281825000  | -0.966301000 |

|                           |              |              |              |                           |              |              |              |
|---------------------------|--------------|--------------|--------------|---------------------------|--------------|--------------|--------------|
| 6                         | 4.896299000  | -0.777546000 | 0.056728000  | 6                         | 4.961273000  | -0.954524000 | 0.043403000  |
| 9                         | 5.224463000  | -1.242986000 | 1.282994000  | 9                         | 5.635203000  | -0.531928000 | 1.153332000  |
| 9                         | 5.681799000  | 0.312755000  | -0.160639000 | 9                         | 5.674613000  | -0.417161000 | -1.013943000 |
| 9                         | 5.278765000  | -1.710192000 | -0.842152000 | 9                         | 5.173625000  | -2.296885000 | -0.048926000 |
| E=-2394.36849658 Hartrees |              |              |              | E=-2394.41461355 Hartrees |              |              |              |
| <b>1g</b>                 |              |              |              | <b>1g'</b>                |              |              |              |
| 24                        | -1.447066000 | -0.415971000 | 0.014474000  | 24                        | -1.546738000 | -0.416353000 | 0.013309000  |
| 6                         | -2.544520000 | 0.598395000  | -1.171636000 | 6                         | -2.762114000 | 0.923253000  | -0.547060000 |
| 8                         | -3.233950000 | 1.148544000  | -1.907678000 | 8                         | -3.614783000 | 1.618140000  | -0.906939000 |
| 6                         | -2.818518000 | -1.707541000 | 0.059659000  | 6                         | -3.019715000 | -1.529001000 | -0.133176000 |
| 8                         | -3.662969000 | -2.487136000 | 0.089315000  | 8                         | -3.941907000 | -2.229471000 | -0.234490000 |
| 6                         | -0.419383000 | -1.575459000 | 1.144494000  | 6                         | -0.661084000 | -1.992556000 | 0.614679000  |
| 8                         | 0.132562000  | -2.321051000 | 1.817085000  | 8                         | -0.271664000 | -3.004086000 | 1.009555000  |
| 6                         | -2.192836000 | 0.385888000  | 1.579082000  | 6                         | -1.806230000 | 0.031070000  | 1.833954000  |
| 8                         | -2.645872000 | 0.834157000  | 2.534515000  | 8                         | -1.952651000 | 0.298356000  | 2.948158000  |
| 6                         | -0.717302000 | -1.298246000 | -1.518078000 | 6                         | -0.969956000 | -0.575926000 | -1.789889000 |
| 8                         | -0.330980000 | -1.863997000 | -2.437913000 | 8                         | -0.624844000 | -0.627724000 | -2.890296000 |
| 6                         | 0.151676000  | 1.032410000  | -0.024930000 | 6                         | 0.307927000  | 0.855540000  | 0.069055000  |
| 7                         | 0.108400000  | 2.353603000  | -0.034296000 | 7                         | 0.286651000  | 2.270749000  | 0.114625000  |
| 6                         | 1.545010000  | 0.479986000  | -0.028834000 | 6                         | 1.663007000  | 0.340307000  | 0.030406000  |
| 6                         | 2.231419000  | 0.303283000  | 1.180282000  | 6                         | 2.751040000  | 1.088572000  | 0.582758000  |
| 6                         | 2.177763000  | 0.107528000  | -1.221508000 | 6                         | 2.021405000  | -0.925851000 | -0.514492000 |
| 6                         | 3.516341000  | -0.233127000 | 1.203216000  | 6                         | 4.055993000  | 0.617187000  | 0.601063000  |
| 1                         | 1.755205000  | 0.573643000  | 2.117159000  | 1                         | 2.531806000  | 2.046621000  | 1.039537000  |
| 6                         | 3.465238000  | -0.424803000 | -1.212290000 | 6                         | 3.326302000  | -1.402590000 | -0.509092000 |
| 1                         | 1.666278000  | 0.230534000  | -2.169536000 | 1                         | 1.261911000  | -1.541041000 | -0.974497000 |
| 6                         | 4.111595000  | -0.586386000 | 0.002683000  | 6                         | 4.331268000  | -0.626723000 | 0.048934000  |
| 1                         | 4.048876000  | -0.381508000 | 2.135550000  | 1                         | 4.856331000  | 1.197695000  | 1.050564000  |
| 1                         | 3.959930000  | -0.717366000 | -2.131289000 | 1                         | 3.566840000  | -2.369056000 | -0.940615000 |
| 6                         | 1.277939000  | 3.256641000  | -0.117747000 | 6                         | 0.857168000  | 3.009221000  | -1.008325000 |
| 1                         | 1.096418000  | 3.992331000  | -0.904349000 | 1                         | 0.114997000  | 3.152889000  | -1.813069000 |
| 1                         | 1.399691000  | 3.787055000  | 0.829875000  | 1                         | 1.193293000  | 4.002850000  | -0.685273000 |
| 1                         | 2.185119000  | 2.708217000  | -0.341307000 | 1                         | 1.710259000  | 2.477489000  | -1.424661000 |
| 6                         | -1.138909000 | 3.128915000  | 0.016296000  | 6                         | -0.802480000 | 3.003140000  | 0.726977000  |
| 1                         | -1.959474000 | 2.513482000  | 0.357275000  | 1                         | -1.179244000 | 2.476622000  | 1.598938000  |
| 1                         | -1.007302000 | 3.964717000  | 0.706163000  | 1                         | -0.429585000 | 3.980105000  | 1.061435000  |
| 1                         | -1.370101000 | 3.528259000  | -0.974318000 | 1                         | -1.640932000 | 3.193114000  | 0.039986000  |
| 9                         | 5.361416000  | -1.108927000 | 0.017859000  | 9                         | 5.624567000  | -1.095072000 | 0.053690000  |
| E=-2115.04087529 Hartrees |              |              |              | E=-2115.08167186 Hartrees |              |              |              |
| <b>1h</b>                 |              |              |              | <b>1h'</b>                |              |              |              |
| 24                        | -2.515282000 | -0.590219000 | -0.047308000 | 24                        | 2.663275000  | -0.578421000 | -0.082215000 |
| 6                         | -3.884911000 | 0.328569000  | -1.003754000 | 6                         | 4.107637000  | 0.477969000  | 0.533714000  |
| 8                         | -4.735700000 | 0.809285000  | -1.608677000 | 8                         | 5.073200000  | 0.992714000  | 0.909108000  |
| 6                         | -3.609960000 | -2.120632000 | -0.128722000 | 6                         | 3.929647000  | -1.932079000 | -0.124461000 |
| 8                         | -4.286934000 | -3.049206000 | -0.174375000 | 8                         | 4.723264000  | -2.780027000 | -0.141013000 |
| 6                         | -1.206594000 | -1.683482000 | 0.834588000  | 6                         | 1.489844000  | -1.919168000 | -0.770426000 |
| 8                         | -0.482609000 | -2.405311000 | 1.351495000  | 8                         | 0.918259000  | -2.808816000 | -1.227378000 |
| 6                         | -3.265038000 | -0.158636000 | 1.654473000  | 6                         | 2.929732000  | -0.005967000 | -1.868997000 |
| 8                         | -3.711792000 | 0.076731000  | 2.686184000  | 8                         | 3.080424000  | 0.343897000  | -2.958840000 |
| 6                         | -1.757767000 | -1.068329000 | -1.737460000 | 6                         | 2.147665000  | -0.835865000 | 1.729297000  |

|                           |              |              |              |                            |              |              |              |
|---------------------------|--------------|--------------|--------------|----------------------------|--------------|--------------|--------------|
| 8                         | -1.348607000 | -1.393688000 | -2.758572000 | 8                          | 1.851635000  | -0.949926000 | 2.838424000  |
| 6                         | -1.217655000 | 1.129562000  | 0.071333000  | 6                          | 1.062283000  | 0.986513000  | 0.077143000  |
| 7                         | -1.509792000 | 2.410878000  | 0.212671000  | 7                          | 1.342697000  | 2.353161000  | 0.176932000  |
| 6                         | 0.251886000  | 0.852273000  | 0.025903000  | 6                          | -0.349022000 | 0.699035000  | 0.085196000  |
| 6                         | 0.974814000  | 0.746180000  | 1.222017000  | 6                          | -1.303323000 | 1.635191000  | -0.434034000 |
| 6                         | 0.936650000  | 0.662223000  | -1.180275000 | 6                          | -0.921169000 | -0.520046000 | 0.555614000  |
| 6                         | 2.333925000  | 0.454833000  | 1.209483000  | 6                          | -2.656439000 | 1.373493000  | -0.483449000 |
| 1                         | 0.468112000  | 0.883940000  | 2.172595000  | 1                          | -0.937895000 | 2.571824000  | -0.841251000 |
| 6                         | 2.299305000  | 0.379948000  | -1.186545000 | 6                          | -2.280078000 | -0.762130000 | 0.532323000  |
| 1                         | 0.405035000  | 0.725752000  | -2.123259000 | 1                          | -0.275701000 | -1.281776000 | 0.970554000  |
| 6                         | 3.027984000  | 0.265254000  | 0.005729000  | 6                          | -3.208454000 | 0.168576000  | 0.011326000  |
| 1                         | 2.868142000  | 0.393004000  | 2.151903000  | 1                          | -3.313165000 | 2.134112000  | -0.897115000 |
| 1                         | 2.796174000  | 0.213831000  | -2.136677000 | 1                          | -2.633792000 | -1.720760000 | 0.900424000  |
| 6                         | -0.531652000 | 3.521233000  | 0.208389000  | 6                          | 0.718401000  | 3.185698000  | 1.201250000  |
| 1                         | -0.895899000 | 4.302467000  | -0.462278000 | 1                          | 1.446837000  | 3.418985000  | 1.994904000  |
| 1                         | -0.443533000 | 3.941155000  | 1.213460000  | 1                          | 0.366798000  | 4.140001000  | 0.786457000  |
| 1                         | 0.442332000  | 3.184405000  | -0.126528000 | 1                          | -0.127702000 | 2.675376000  | 1.652566000  |
| 6                         | -2.877956000 | 2.922667000  | 0.371458000  | 6                          | 2.552552000  | 2.966794000  | -0.330344000 |
| 1                         | -3.543655000 | 2.138190000  | 0.704066000  | 1                          | 2.971977000  | 2.384975000  | -1.143448000 |
| 1                         | -2.869792000 | 3.721780000  | 1.115064000  | 1                          | 2.313015000  | 3.965694000  | -0.719192000 |
| 1                         | -3.239288000 | 3.331627000  | -0.575291000 | 1                          | 3.320013000  | 3.094704000  | 0.447240000  |
| 6                         | 4.477398000  | -0.053298000 | -0.003282000 | 6                          | -4.650997000 | -0.100945000 | -0.019662000 |
| 6                         | 5.025670000  | -0.936782000 | 0.938865000  | 6                          | -5.498967000 | 0.491769000  | -0.981849000 |
| 6                         | 5.337027000  | 0.518005000  | -0.953587000 | 6                          | -5.264111000 | -0.968341000 | 0.912101000  |
| 6                         | 6.385419000  | -1.236520000 | 0.932362000  | 6                          | -6.865630000 | 0.237012000  | -1.008159000 |
| 6                         | 6.696843000  | 0.218590000  | -0.960723000 | 6                          | -6.629899000 | -1.226867000 | 0.881475000  |
| 6                         | 7.227415000  | -0.659932000 | -0.017245000 | 6                          | -7.448422000 | -0.626240000 | -0.077599000 |
| 1                         | 4.376793000  | -1.415714000 | 1.664988000  | 1                          | -5.071225000 | 1.139740000  | -1.739458000 |
| 1                         | 4.941918000  | 1.222184000  | -1.678855000 | 1                          | -4.660217000 | -1.425342000 | 1.688657000  |
| 1                         | 6.785758000  | -1.930780000 | 1.664479000  | 1                          | -7.480632000 | 0.706332000  | -1.771890000 |
| 1                         | 7.344540000  | 0.678698000  | -1.700407000 | 1                          | -7.062322000 | -1.895482000 | 1.621510000  |
| 1                         | 8.286988000  | -0.894261000 | -0.023058000 | 1                          | -8.515227000 | -0.827581000 | -0.100479000 |
| E=-2246.87631662 Hartrees |              |              |              | E= -2246.91898264 Hartrees |              |              |              |
| <b>1i</b>                 |              |              |              | <b>1i'</b>                 |              |              |              |
| 24                        | -2.185958000 | -0.526164000 | 0.019142000  | 24                         | -2.322608000 | -0.524194000 | 0.016454000  |
| 6                         | -3.429934000 | 0.335317000  | -1.143552000 | 6                          | -3.710652000 | 0.658224000  | -0.492746000 |
| 8                         | -4.200512000 | 0.789594000  | -1.864288000 | 8                          | -4.652635000 | 1.246556000  | -0.817277000 |
| 6                         | -3.374321000 | -1.987448000 | 0.084757000  | 6                          | -3.651477000 | -1.809451000 | -0.108824000 |
| 8                         | -4.106967000 | -2.872333000 | 0.126026000  | 8                          | -4.483618000 | -2.615584000 | -0.197195000 |
| 6                         | -0.994690000 | -1.541310000 | 1.128173000  | 6                          | -1.235325000 | -1.990093000 | 0.569940000  |
| 8                         | -0.337803000 | -2.208004000 | 1.788866000  | 8                          | -0.718703000 | -2.953532000 | 0.936313000  |
| 6                         | -3.002760000 | 0.172562000  | 1.597874000  | 6                          | -2.586303000 | -0.129153000 | 1.849948000  |
| 8                         | -3.493943000 | 0.559144000  | 2.561275000  | 8                          | -2.733374000 | 0.113232000  | 2.969316000  |
| 6                         | -1.376496000 | -1.306416000 | -1.529415000 | 6                          | -1.777604000 | -0.591929000 | -1.802477000 |
| 8                         | -0.938236000 | -1.817304000 | -2.458001000 | 8                          | -1.455948000 | -0.586867000 | -2.910844000 |
| 6                         | -0.792709000 | 1.120202000  | -0.041715000 | 6                          | -0.641051000 | 0.966498000  | 0.045822000  |
| 7                         | -1.008188000 | 2.424130000  | -0.052804000 | 7                          | -0.837383000 | 2.361709000  | 0.093978000  |
| 6                         | 0.659357000  | 0.754799000  | -0.048770000 | 6                          | 0.760546000  | 0.614286000  | 0.011210000  |
| 6                         | 1.370996000  | 0.703493000  | 1.157211000  | 6                          | 1.750941000  | 1.469239000  | 0.594779000  |
| 6                         | 1.330015000  | 0.433965000  | -1.235058000 | 6                          | 1.270758000  | -0.587743000 | -0.559620000 |

|                           |              |              |              |                           |              |              |              |
|---------------------------|--------------|--------------|--------------|---------------------------|--------------|--------------|--------------|
| 6                         | 2.715320000  | 0.342036000  | 1.182254000  | 6                         | 3.099988000  | 1.155696000  | 0.614919000  |
| 1                         | 0.869676000  | 0.933836000  | 2.092068000  | 1                         | 1.420203000  | 2.380944000  | 1.079729000  |
| 6                         | 2.677118000  | 0.078524000  | -1.221557000 | 6                         | 2.620818000  | -0.905593000 | -0.557837000 |
| 1                         | 0.803268000  | 0.460144000  | -2.182496000 | 1                         | 0.592588000  | -1.276797000 | -1.042680000 |
| 6                         | 3.362212000  | 0.033975000  | -0.011034000 | 6                         | 3.537396000  | -0.034496000 | 0.030777000  |
| 1                         | 3.249974000  | 0.298743000  | 2.123666000  | 1                         | 3.808005000  | 1.824025000  | 1.094303000  |
| 1                         | 3.183550000  | -0.165957000 | -2.147733000 | 1                         | 2.958559000  | -1.827365000 | -1.019021000 |
| 6                         | 0.033247000  | 3.470814000  | -0.153206000 | 6                         | -0.278179000 | 3.202731000  | -0.961174000 |
| 1                         | -0.272723000 | 4.194353000  | -0.911588000 | 1                         | -1.009014000 | 3.350944000  | -1.774582000 |
| 1                         | 0.126710000  | 3.991064000  | 0.803282000  | 1                         | -0.012004000 | 4.193204000  | -0.570101000 |
| 1                         | 0.992443000  | 3.047929000  | -0.427077000 | 1                         | 0.614903000  | 2.750543000  | -1.385278000 |
| 6                         | -2.344705000 | 3.029870000  | 0.019947000  | 6                         | -2.021481000 | 2.965284000  | 0.669539000  |
| 1                         | -3.073035000 | 2.308243000  | 0.361898000  | 1                         | -2.406148000 | 2.361314000  | 1.485017000  |
| 1                         | -2.314920000 | 3.867735000  | 0.719413000  | 1                         | -1.758223000 | 3.950868000  | 1.075655000  |
| 1                         | -2.637926000 | 3.406874000  | -0.962937000 | 1                         | -2.825770000 | 3.120240000  | -0.065188000 |
| 35                        | 5.206202000  | -0.461000000 | 0.014150000  | 35                        | 5.421290000  | -0.466019000 | 0.022896000  |
| E=-4589.31815911 Hartrees |              |              |              | E=-4589.35972440 Hartrees |              |              |              |
| <b>1j</b>                 |              |              |              | <b>1j'</b>                |              |              |              |
| 24                        | -1.694378000 | -0.482022000 | 0.019208000  | 24                        | -1.800038000 | -0.482483000 | 0.016914000  |
| 6                         | -2.905168000 | 0.450048000  | -1.122655000 | 6                         | -3.135033000 | 0.762365000  | -0.483419000 |
| 8                         | -3.662070000 | 0.945043000  | -1.831383000 | 8                         | -4.049514000 | 1.395440000  | -0.802375000 |
| 6                         | -2.956948000 | -1.878511000 | 0.086402000  | 6                         | -3.185490000 | -1.707356000 | -0.099503000 |
| 8                         | -3.735134000 | -2.724019000 | 0.129706000  | 8                         | -4.053489000 | -2.475365000 | -0.182128000 |
| 6                         | -0.549922000 | -1.572349000 | 1.106156000  | 6                         | -0.772409000 | -1.995613000 | 0.560055000  |
| 8                         | 0.073428000  | -2.282837000 | 1.753846000  | 8                         | -0.296286000 | -2.981266000 | 0.921366000  |
| 6                         | -2.452157000 | 0.250983000  | 1.610801000  | 6                         | -2.035293000 | -0.082506000 | 1.853231000  |
| 8                         | -2.908062000 | 0.662025000  | 2.581686000  | 8                         | -2.165681000 | 0.160724000  | 2.974522000  |
| 6                         | -0.939887000 | -1.282420000 | -1.546472000 | 6                         | -1.276585000 | -0.577193000 | -1.807840000 |
| 8                         | -0.536191000 | -1.800527000 | -2.486718000 | 8                         | -0.970071000 | -0.588585000 | -2.920167000 |
| 6                         | -0.210859000 | 1.085227000  | -0.038525000 | 6                         | -0.053329000 | 0.931371000  | 0.038842000  |
| 7                         | -0.356020000 | 2.399082000  | -0.049792000 | 7                         | -0.187893000 | 2.330618000  | 0.094612000  |
| 6                         | 1.219137000  | 0.641862000  | -0.043633000 | 6                         | 1.327815000  | 0.511747000  | 0.000027000  |
| 6                         | 1.928448000  | 0.547759000  | 1.160229000  | 6                         | 2.360433000  | 1.307377000  | 0.596334000  |
| 6                         | 1.876490000  | 0.285980000  | -1.227408000 | 6                         | 1.779186000  | -0.706041000 | -0.589220000 |
| 6                         | 3.250887000  | 0.116532000  | 1.183463000  | 6                         | 3.687513000  | 0.918592000  | 0.613982000  |
| 1                         | 1.441508000  | 0.803859000  | 2.096246000  | 1                         | 2.076208000  | 2.229971000  | 1.090623000  |
| 6                         | 3.198719000  | -0.145380000 | -1.209355000 | 6                         | 3.110553000  | -1.084738000 | -0.589654000 |
| 1                         | 1.354657000  | 0.340578000  | -2.176440000 | 1                         | 1.067834000  | -1.349115000 | -1.088157000 |
| 6                         | 3.900756000  | -0.235930000 | -0.002997000 | 6                         | 4.092756000  | -0.289161000 | 0.021763000  |
| 1                         | 3.769535000  | 0.054689000  | 2.134746000  | 1                         | 4.426854000  | 1.545609000  | 1.104602000  |
| 1                         | 3.679966000  | -0.422910000 | -2.141728000 | 1                         | 3.401684000  | -2.011925000 | -1.074135000 |
| 6                         | 0.740508000  | 3.387376000  | -0.153440000 | 6                         | 0.436788000  | 3.162080000  | -0.930968000 |
| 1                         | 0.483974000  | 4.112228000  | -0.929032000 | 1                         | -0.275534000 | 3.376729000  | -1.745683000 |
| 1                         | 0.847560000  | 3.919517000  | 0.795059000  | 1                         | 0.760589000  | 4.123356000  | -0.511501000 |
| 1                         | 1.679300000  | 2.908376000  | -0.404538000 | 1                         | 1.303723000  | 2.665107000  | -1.358345000 |
| 6                         | -1.658328000 | 3.075760000  | 0.018019000  | 6                         | -1.344478000 | 2.988670000  | 0.666434000  |
| 1                         | -2.421737000 | 2.400012000  | 0.377245000  | 1                         | -1.773691000 | 2.392814000  | 1.465219000  |
| 1                         | -1.580301000 | 3.923525000  | 0.701526000  | 1                         | -1.032512000 | 3.950560000  | 1.094322000  |
| 1                         | -1.937657000 | 3.449820000  | -0.970094000 | 1                         | -2.127808000 | 3.201469000  | -0.076401000 |
| 16                        | 5.597923000  | -0.785061000 | -0.060563000 | 16                        | 5.822643000  | -0.764539000 | -0.006419000 |



|                            |              |              |              |                            |              |              |              |
|----------------------------|--------------|--------------|--------------|----------------------------|--------------|--------------|--------------|
| 1                          | 5.767826000  | -0.912850000 | 1.272963000  | 1                          | 5.852274000  | -1.551857000 | 1.103798000  |
| E= -2413.98231925 Hartrees |              |              |              | E=-2414.02578167 Hartrees  |              |              |              |
| <b>1k</b>                  |              |              |              | <b>1k'</b>                 |              |              |              |
| 24                         | -1.648276000 | -0.487938000 | 0.025259000  | 24                         | 1.787509000  | -0.442069000 | -0.034735000 |
| 6                          | -2.868312000 | 0.478456000  | -1.077245000 | 6                          | 3.056543000  | 0.861940000  | 0.483277000  |
| 8                          | -3.627759000 | 0.999936000  | -1.763902000 | 8                          | 3.932359000  | 1.543153000  | 0.810844000  |
| 6                          | -2.912602000 | -1.882865000 | 0.075360000  | 6                          | 3.234749000  | -1.598340000 | 0.038708000  |
| 8                          | -3.692685000 | -2.727216000 | 0.108271000  | 8                          | 4.141658000  | -2.322057000 | 0.094822000  |
| 6                          | -0.489392000 | -1.603067000 | 1.071597000  | 6                          | 0.824075000  | -1.992063000 | -0.598971000 |
| 8                          | 0.140703000  | -2.328875000 | 1.695167000  | 8                          | 0.391454000  | -2.991626000 | -0.974015000 |
| 6                          | -2.385511000 | 0.199980000  | 1.646243000  | 6                          | 1.988060000  | 0.001025000  | -1.865956000 |
| 8                          | -2.830750000 | 0.579072000  | 2.634955000  | 8                          | 2.099885000  | 0.267969000  | -2.983700000 |
| 6                          | -0.917552000 | -1.258813000 | -1.567097000 | 6                          | 1.300899000  | -0.613327000 | 1.795277000  |
| 8                          | -0.530861000 | -1.763244000 | -2.521607000 | 8                          | 1.019692000  | -0.671880000 | 2.912426000  |
| 6                          | -0.168921000 | 1.085219000  | -0.023276000 | 6                          | -0.022909000 | 0.884710000  | -0.005192000 |
| 7                          | -0.313764000 | 2.397871000  | 0.026442000  | 7                          | 0.062882000  | 2.280195000  | -0.023950000 |
| 6                          | 1.256805000  | 0.641977000  | -0.108268000 | 6                          | -1.376349000 | 0.402388000  | 0.049642000  |
| 6                          | 2.011342000  | 0.473357000  | 1.063762000  | 6                          | -2.455782000 | 1.154125000  | -0.530803000 |
| 6                          | 1.869352000  | 0.366983000  | -1.335251000 | 6                          | -1.768884000 | -0.845055000 | 0.622236000  |
| 6                          | 3.329460000  | 0.044632000  | 1.007731000  | 6                          | -3.758538000 | 0.712978000  | -0.535336000 |
| 1                          | 1.555926000  | 0.669446000  | 2.029688000  | 1                          | -2.217522000 | 2.085911000  | -1.032983000 |
| 6                          | 3.194241000  | -0.055751000 | -1.384035000 | 6                          | -3.081815000 | -1.270260000 | 0.633997000  |
| 1                          | 1.312542000  | 0.483454000  | -2.258768000 | 1                          | -1.024440000 | -1.468627000 | 1.097376000  |
| 6                          | 3.955487000  | -0.230941000 | -0.219206000 | 6                          | -4.133684000 | -0.516692000 | 0.064073000  |
| 1                          | 3.876853000  | -0.075385000 | 1.936380000  | 1                          | -4.512357000 | 1.319728000  | -1.030494000 |
| 1                          | 3.646270000  | -0.261331000 | -2.350062000 | 1                          | -3.318281000 | -2.222428000 | 1.105498000  |
| 6                          | 0.780583000  | 3.389876000  | -0.063164000 | 6                          | -0.677063000 | 3.104573000  | 0.926685000  |
| 1                          | 0.503058000  | 4.150877000  | -0.795674000 | 1                          | 0.011352000  | 3.520080000  | 1.680573000  |
| 1                          | 0.915523000  | 3.876082000  | 0.906196000  | 1                          | -1.171594000 | 3.950465000  | 0.430229000  |
| 1                          | 1.711025000  | 2.923374000  | -0.363982000 | 1                          | -1.433946000 | 2.517905000  | 1.439294000  |
| 6                          | -1.611756000 | 3.071580000  | 0.165206000  | 6                          | 1.169053000  | 3.013311000  | -0.604345000 |
| 1                          | -2.372585000 | 2.374127000  | 0.485679000  | 1                          | 1.671780000  | 2.423323000  | -1.362391000 |
| 1                          | -1.519858000 | 3.867787000  | 0.906772000  | 1                          | 0.784716000  | 3.922777000  | -1.085794000 |
| 1                          | -1.904285000 | 3.516638000  | -0.789109000 | 1                          | 1.907291000  | 3.329066000  | 0.147478000  |
| 6                          | 5.347772000  | -0.689923000 | -0.333018000 | 6                          | -5.492986000 | -1.014862000 | 0.104054000  |
| 1                          | 5.702866000  | -0.808858000 | -1.355344000 | 1                          | -5.598950000 | -1.989854000 | 0.582394000  |
| 6                          | 6.196380000  | -0.974521000 | 0.659930000  | 6                          | -6.623020000 | -0.440266000 | -0.365334000 |
| 1                          | 5.928052000  | -0.896870000 | 1.708510000  | 1                          | -6.630547000 | 0.528218000  | -0.855734000 |
| 1                          | 7.206128000  | -1.308366000 | 0.449722000  | 1                          | -7.582369000 | -0.937859000 | -0.269252000 |
| E= -2093.18786654 Hartrees |              |              |              | E= -2093.23213336 Hartrees |              |              |              |
| <b>1l</b>                  |              |              |              | <b>1l'</b>                 |              |              |              |
| 24                         | -2.245088000 | -0.647388000 | 0.010368000  | 24                         | -2.472710000 | -0.592726000 | 0.034458000  |
| 6                          | -3.552236000 | 0.023093000  | -1.208425000 | 6                          | -3.987337000 | 0.508808000  | -0.244903000 |
| 8                          | -4.345627000 | 0.369179000  | -1.963215000 | 8                          | -4.996770000 | 1.041884000  | -0.432693000 |
| 6                          | -3.192576000 | -2.277168000 | 0.029043000  | 6                          | -3.711387000 | -1.968315000 | -0.057313000 |
| 8                          | -3.779794000 | -3.265059000 | 0.041192000  | 8                          | -4.487490000 | -2.830111000 | -0.124768000 |
| 6                          | -0.957229000 | -1.455577000 | 1.178541000  | 6                          | -1.228165000 | -2.000890000 | 0.358495000  |
| 8                          | -0.231018000 | -2.001664000 | 1.876415000  | 8                          | -0.604642000 | -2.942166000 | 0.590861000  |
| 6                          | -3.233441000 | -0.107332000 | 1.552796000  | 6                          | -2.572586000 | -0.355492000 | 1.911619000  |

|   |              |              |              |   |              |              |              |
|---|--------------|--------------|--------------|---|--------------|--------------|--------------|
| 8 | -3.824990000 | 0.174591000  | 2.495849000  | 8 | -2.620212000 | -0.210613000 | 3.055965000  |
| 6 | -1.259241000 | -1.301020000 | -1.494636000 | 6 | -2.122210000 | -0.497461000 | -1.830441000 |
| 8 | -0.709989000 | -1.748077000 | -2.396326000 | 8 | -1.922265000 | -0.396381000 | -2.962501000 |
| 6 | -1.133573000 | 1.199696000  | -0.011318000 | 6 | -0.912288000 | 1.023912000  | 0.018798000  |
| 7 | -1.551893000 | 2.453380000  | 0.004188000  | 7 | -1.205951000 | 2.389370000  | 0.208552000  |
| 6 | 0.358128000  | 1.066126000  | -0.040343000 | 6 | 0.500157000  | 0.792553000  | -0.186264000 |
| 6 | 1.086790000  | 1.060468000  | 1.156780000  | 6 | 1.480904000  | 1.683520000  | 0.361880000  |
| 6 | 1.049291000  | 0.925735000  | -1.250723000 | 6 | 1.032412000  | -0.317608000 | -0.906424000 |
| 6 | 2.471291000  | 0.916157000  | 1.148907000  | 6 | 2.842759000  | 1.479506000  | 0.219446000  |
| 1 | 0.570458000  | 1.163096000  | 2.105475000  | 1 | 1.135791000  | 2.530031000  | 0.943966000  |
| 6 | 2.433968000  | 0.782770000  | -1.267448000 | 6 | 2.394433000  | -0.522750000 | -1.061844000 |
| 1 | 0.507037000  | 0.928199000  | -2.189596000 | 1 | 0.358631000  | -1.017001000 | -1.379653000 |
| 6 | 3.128162000  | 0.772972000  | -0.065651000 | 6 | 3.295729000  | 0.369477000  | -0.489655000 |
| 1 | 3.035492000  | 0.914258000  | 2.073913000  | 1 | 3.556012000  | 2.165914000  | 0.664712000  |
| 1 | 2.971448000  | 0.678782000  | -2.202595000 | 1 | 2.761398000  | -1.368887000 | -1.633450000 |
| 6 | -0.689726000 | 3.654633000  | -0.056119000 | 6 | -0.829152000 | 3.355220000  | -0.820051000 |
| 1 | -1.077439000 | 4.326478000  | -0.824839000 | 1 | -1.650870000 | 3.502389000  | -1.541518000 |
| 1 | -0.719666000 | 4.174792000  | 0.904436000  | 1 | -0.601618000 | 4.331458000  | -0.373034000 |
| 1 | 0.335311000  | 3.394647000  | -0.291333000 | 1 | 0.046872000  | 3.016384000  | -1.367555000 |
| 6 | -2.968193000 | 2.839288000  | 0.070292000  | 6 | -2.361559000 | 2.844071000  | 0.954154000  |
| 1 | -3.581100000 | 1.999154000  | 0.364181000  | 1 | -2.604614000 | 2.149280000  | 1.751483000  |
| 1 | -3.083052000 | 3.641241000  | 0.802282000  | 1 | -2.130860000 | 3.814688000  | 1.412471000  |
| 1 | -3.298312000 | 3.207616000  | -0.904168000 | 1 | -3.252380000 | 2.984813000  | 0.323971000  |
| 8 | 4.534989000  | 0.702924000  | -0.090337000 | 8 | 4.695193000  | 0.205676000  | -0.732638000 |
| 6 | 5.113483000  | -0.513418000 | 0.020297000  | 6 | 5.417034000  | -0.462054000 | 0.167606000  |
| 9 | 4.836565000  | -1.117080000 | 1.195234000  | 9 | 5.441329000  | 0.124248000  | 1.391406000  |
| 9 | 6.433824000  | -0.345941000 | -0.062723000 | 9 | 6.690303000  | -0.516530000 | -0.271288000 |
| 9 | 4.730418000  | -1.363458000 | -0.954342000 | 9 | 5.004519000  | -1.735555000 | 0.367365000  |

E=-2428.16062743 Hartrees

E= -2428.20804906 Hartrees

**1m**

|    |              |              |              |
|----|--------------|--------------|--------------|
| 24 | -1.574421000 | -0.474779000 | 0.014493000  |
| 6  | -2.742887000 | 0.470822000  | -1.162723000 |
| 8  | -3.470515000 | 0.976975000  | -1.892864000 |
| 6  | -2.862223000 | -1.851814000 | 0.059952000  |
| 8  | -3.654515000 | -2.683532000 | 0.089690000  |
| 6  | -0.473208000 | -1.574448000 | 1.134575000  |
| 8  | 0.126510000  | -2.288311000 | 1.800534000  |
| 6  | -2.360842000 | 0.273635000  | 1.586742000  |
| 8  | -2.834062000 | 0.690451000  | 2.546116000  |
| 6  | -0.796567000 | -1.304912000 | -1.524051000 |
| 8  | -0.376439000 | -1.841737000 | -2.446148000 |
| 6  | -0.080315000 | 1.079901000  | -0.026434000 |
| 7  | -0.207276000 | 2.394984000  | -0.033423000 |
| 6  | 1.341635000  | 0.613365000  | -0.032625000 |
| 6  | 2.036376000  | 0.470036000  | 1.177038000  |
| 6  | 1.996803000  | 0.283325000  | -1.226625000 |
| 6  | 3.347294000  | 0.011874000  | 1.197945000  |
| 1  | 1.543890000  | 0.707505000  | 2.114215000  |
| 6  | 3.309891000  | -0.171287000 | -1.216842000 |
| 1  | 1.479368000  | 0.379956000  | -2.174318000 |

**1m'**

|    |              |              |              |
|----|--------------|--------------|--------------|
| 24 | -1.685724000 | -0.464209000 | 0.019569000  |
| 6  | -2.971811000 | 0.808541000  | -0.537044000 |
| 8  | -3.852990000 | 1.468381000  | -0.890840000 |
| 6  | -3.103586000 | -1.656407000 | -0.076917000 |
| 8  | -3.990796000 | -2.401891000 | -0.146799000 |
| 6  | -0.694137000 | -1.983244000 | 0.615813000  |
| 8  | -0.237832000 | -2.965826000 | 1.006949000  |
| 6  | -1.946255000 | -0.020523000 | 1.844425000  |
| 8  | -2.095913000 | 0.244621000  | 2.957677000  |
| 6  | -1.164971000 | -0.643181000 | -1.800190000 |
| 8  | -0.862776000 | -0.708315000 | -2.911217000 |
| 6  | 0.087718000  | 0.909762000  | 0.022630000  |
| 7  | -0.028156000 | 2.303888000  | 0.048561000  |
| 6  | 1.455498000  | 0.461263000  | -0.000803000 |
| 6  | 2.502464000  | 1.240322000  | 0.600475000  |
| 6  | 1.884502000  | -0.778195000 | -0.569029000 |
| 6  | 3.817784000  | 0.831067000  | 0.630511000  |
| 1  | 2.234402000  | 2.167525000  | 1.094232000  |
| 6  | 3.202274000  | -1.185816000 | -0.561227000 |
| 1  | 1.161231000  | -1.414879000 | -1.057987000 |

|                            |              |              |              |                            |              |              |              |
|----------------------------|--------------|--------------|--------------|----------------------------|--------------|--------------|--------------|
| 6                          | 3.987884000  | -0.307677000 | -0.002433000 | 6                          | 4.197114000  | -0.389075000 | 0.036913000  |
| 1                          | 3.878309000  | -0.103176000 | 2.135571000  | 1                          | 4.571870000  | 1.436255000  | 1.124758000  |
| 1                          | 3.813249000  | -0.425363000 | -2.142296000 | 1                          | 3.484955000  | -2.126474000 | -1.022868000 |
| 6                          | 0.902414000  | 3.370426000  | -0.116227000 | 6                          | 0.699689000  | 3.144054000  | -0.898727000 |
| 1                          | 0.670584000  | 4.098470000  | -0.896409000 | 1                          | 0.014129000  | 3.518129000  | -1.676120000 |
| 1                          | 0.996280000  | 3.900832000  | 0.834505000  | 1                          | 1.144610000  | 4.017266000  | -0.403295000 |
| 1                          | 1.841241000  | 2.882303000  | -0.349270000 | 1                          | 1.493300000  | 2.583369000  | -1.384296000 |
| 6                          | -1.501995000 | 3.087889000  | 0.024132000  | 6                          | -1.167539000 | 3.006810000  | 0.602860000  |
| 1                          | -2.280641000 | 2.416222000  | 0.357047000  | 1                          | -1.664064000 | 2.408145000  | 1.358211000  |
| 1                          | -1.424978000 | 3.922324000  | 0.723818000  | 1                          | -0.819611000 | 3.931938000  | 1.081356000  |
| 1                          | -1.757567000 | 3.482501000  | -0.962297000 | 1                          | -1.902427000 | 3.292520000  | -0.163829000 |
| 7                          | 5.296680000  | -0.760898000 | 0.011989000  | 7                          | 5.516382000  | -0.793911000 | 0.045978000  |
| 6                          | 6.407857000  | -1.140508000 | 0.024743000  | 6                          | 6.641898000  | -1.135105000 | 0.055688000  |
| E= -2108.00373878 Hartrees |              |              |              | E=-2108.05752207 Hartrees  |              |              |              |
| <b>1n</b>                  |              |              |              | <b>1n'</b>                 |              |              |              |
| 24                         | -1.577722000 | -0.480821000 | 0.013915000  | 24                         | -1.691080000 | -0.468541000 | 0.022404000  |
| 6                          | -2.747531000 | 0.457402000  | -1.168708000 | 6                          | -2.982278000 | 0.792171000  | -0.548673000 |
| 8                          | -3.474762000 | 0.958929000  | -1.902153000 | 8                          | -3.862670000 | 1.447973000  | -0.911163000 |
| 6                          | -2.859817000 | -1.864075000 | 0.056562000  | 6                          | -3.101766000 | -1.671905000 | -0.053384000 |
| 8                          | -3.648258000 | -2.699193000 | 0.084341000  | 8                          | -3.984759000 | -2.422935000 | -0.109688000 |
| 6                          | -0.475457000 | -1.575615000 | 1.137738000  | 6                          | -0.679959000 | -1.971770000 | 0.631668000  |
| 8                          | 0.125061000  | -2.286877000 | 1.805613000  | 8                          | -0.210260000 | -2.943972000 | 1.030751000  |
| 6                          | -2.373075000 | 0.263636000  | 1.583972000  | 6                          | -1.957695000 | -0.010530000 | 1.843820000  |
| 8                          | -2.851497000 | 0.677434000  | 2.541885000  | 8                          | -2.113630000 | 0.262704000  | 2.953987000  |
| 6                          | -0.791970000 | -1.309948000 | -1.521630000 | 6                          | -1.186758000 | -0.674986000 | -1.799513000 |
| 8                          | -0.367102000 | -1.846448000 | -2.441553000 | 8                          | -0.899596000 | -0.758061000 | -2.912937000 |
| 6                          | -0.096816000 | 1.085115000  | -0.024102000 | 6                          | 0.072085000  | 0.916582000  | 0.007905000  |
| 7                          | -0.230950000 | 2.399141000  | -0.030143000 | 7                          | -0.056485000 | 2.304725000  | 0.022532000  |
| 6                          | 1.325622000  | 0.624571000  | -0.030705000 | 6                          | 1.439628000  | 0.472861000  | -0.011253000 |
| 6                          | 2.018138000  | 0.476620000  | 1.180417000  | 6                          | 2.480318000  | 1.248201000  | 0.608815000  |
| 6                          | 1.982828000  | 0.305435000  | -1.227382000 | 6                          | 1.876420000  | -0.760793000 | -0.589184000 |
| 6                          | 3.330452000  | 0.025313000  | 1.198290000  | 6                          | 3.793942000  | 0.842888000  | 0.642860000  |
| 1                          | 1.521814000  | 0.706242000  | 2.117466000  | 1                          | 2.205536000  | 2.166898000  | 1.114967000  |
| 6                          | 3.297035000  | -0.142763000 | -1.216961000 | 6                          | 3.193913000  | -1.160507000 | -0.579492000 |
| 1                          | 1.464571000  | 0.406373000  | -2.174185000 | 1                          | 1.157604000  | -1.394492000 | -1.088897000 |
| 6                          | 3.983826000  | -0.286148000 | -0.002825000 | 6                          | 4.197495000  | -0.371681000 | 0.034258000  |
| 1                          | 3.853760000  | -0.088804000 | 2.140689000  | 1                          | 4.534491000  | 1.451053000  | 1.154288000  |
| 1                          | 3.795628000  | -0.385209000 | -2.148435000 | 1                          | 3.473117000  | -2.096053000 | -1.054192000 |
| 6                          | 0.873764000  | 3.380474000  | -0.109199000 | 6                          | 0.714376000  | 3.162662000  | -0.874111000 |
| 1                          | 0.642502000  | 4.105672000  | -0.892146000 | 1                          | 0.048056000  | 3.599471000  | -1.634088000 |
| 1                          | 0.959416000  | 3.913190000  | 0.840970000  | 1                          | 1.189237000  | 3.993207000  | -0.335175000 |
| 1                          | 1.816762000  | 2.897433000  | -0.336230000 | 1                          | 1.488584000  | 2.595312000  | -1.382366000 |
| 6                          | -1.529802000 | 3.084505000  | 0.025899000  | 6                          | -1.200378000 | 3.009206000  | 0.567158000  |
| 1                          | -2.305817000 | 2.406696000  | 0.352487000  | 1                          | -1.718429000 | 2.402022000  | 1.300399000  |
| 1                          | -1.460155000 | 3.915927000  | 0.729892000  | 1                          | -0.853419000 | 3.921838000  | 1.069498000  |
| 1                          | -1.783604000 | 3.482305000  | -0.959676000 | 1                          | -1.914708000 | 3.315080000  | -0.210469000 |
| 6                          | 5.338827000  | -0.742684000 | 0.010526000  | 6                          | 5.552097000  | -0.780359000 | 0.046261000  |
| 7                          | 6.436202000  | -1.105129000 | 0.021398000  | 7                          | 6.667133000  | -1.111475000 | 0.057173000  |
| E= -2108.03864706 Hartrees |              |              |              | E= -2108.09690421 Hartrees |              |              |              |

|                            |              |              |              |                            |              |              |              |
|----------------------------|--------------|--------------|--------------|----------------------------|--------------|--------------|--------------|
| <b>2g</b>                  |              |              |              | <b>2g'</b>                 |              |              |              |
| 24                         | -1.701742000 | -0.376150000 | 0.074630000  | 24                         | -1.844575000 | -0.266690000 | 0.003006000  |
| 6                          | -1.739799000 | -1.302348000 | -1.593754000 | 6                          | -1.684420000 | -0.602792000 | -1.854256000 |
| 8                          | -1.735133000 | -1.889597000 | -2.582764000 | 8                          | -1.551419000 | -0.842629000 | -2.978395000 |
| 6                          | -3.336776000 | -1.167774000 | 0.588521000  | 6                          | -3.600711000 | -0.844553000 | 0.088973000  |
| 8                          | -4.324285000 | -1.663066000 | 0.915038000  | 8                          | -4.700611000 | -1.227375000 | 0.144376000  |
| 6                          | -1.567371000 | 0.491599000  | 1.765636000  | 6                          | -1.677116000 | 0.017693000  | 1.872162000  |
| 8                          | -1.456324000 | 0.968681000  | 2.807510000  | 8                          | -1.541051000 | 0.111437000  | 3.016562000  |
| 6                          | -0.845926000 | -1.864646000 | 0.819574000  | 6                          | -1.391555000 | -2.028568000 | 0.368019000  |
| 8                          | -0.360388000 | -2.797964000 | 1.285514000  | 8                          | -1.217829000 | -3.145538000 | 0.624084000  |
| 6                          | 0.153100000  | 0.494136000  | -0.374690000 | 6                          | 0.271076000  | 0.419512000  | -0.073326000 |
| 7                          | 0.211540000  | 1.768956000  | -0.722334000 | 7                          | 0.476973000  | 1.819164000  | 0.070456000  |
| 6                          | 1.454965000  | -0.217235000 | -0.242131000 | 6                          | 1.464233000  | -0.382616000 | -0.029075000 |
| 6                          | 2.224770000  | -0.094082000 | 0.922946000  | 6                          | 2.655701000  | 0.044620000  | 0.641238000  |
| 6                          | 1.895348000  | -1.080274000 | -1.254096000 | 6                          | 1.537274000  | -1.668313000 | -0.641703000 |
| 6                          | 3.411868000  | -0.806841000 | 1.073110000  | 6                          | 3.802143000  | -0.738684000 | 0.693621000  |
| 1                          | 1.889848000  | 0.552455000  | 1.726833000  | 1                          | 2.647997000  | 0.993078000  | 1.165018000  |
| 6                          | 3.089388000  | -1.785292000 | -1.121738000 | 6                          | 2.681754000  | -2.449959000 | -0.601842000 |
| 1                          | 1.300196000  | -1.210249000 | -2.151458000 | 1                          | 0.675282000  | -2.039868000 | -1.179544000 |
| 6                          | 3.825813000  | -1.635661000 | 0.042459000  | 6                          | 3.805552000  | -1.975619000 | 0.065489000  |
| 1                          | 4.006815000  | -0.728164000 | 1.975814000  | 1                          | 4.684980000  | -0.403584000 | 1.230410000  |
| 1                          | 3.439597000  | -2.452360000 | -1.901002000 | 1                          | 2.711005000  | -3.421086000 | -1.085856000 |
| 6                          | 1.692545000  | 3.627424000  | 0.046634000  | 6                          | 2.198955000  | 3.612854000  | -0.082730000 |
| 1                          | 0.901654000  | 4.354510000  | 0.220771000  | 1                          | 1.583920000  | 4.336227000  | 0.451561000  |
| 6                          | -2.157533000 | 1.513499000  | -1.201223000 | 6                          | -1.873434000 | 1.986486000  | -0.587551000 |
| 1                          | -2.123630000 | 1.193073000  | -2.237875000 | 1                          | -1.709488000 | 2.011736000  | -1.661331000 |
| 6                          | -1.081250000 | 2.478427000  | -0.800128000 | 6                          | -0.764850000 | 2.567360000  | 0.250208000  |
| 1                          | -0.982279000 | 3.290431000  | -1.529349000 | 1                          | -0.592378000 | 3.616791000  | -0.024776000 |
| 1                          | -1.302208000 | 2.931461000  | 0.171992000  | 1                          | -1.061012000 | 2.568185000  | 1.305188000  |
| 6                          | 1.427876000  | 2.575242000  | -0.997785000 | 6                          | 1.462035000  | 2.503501000  | -0.787800000 |
| 1                          | 2.274665000  | 1.899074000  | -1.085883000 | 1                          | 2.173606000  | 1.768826000  | -1.159505000 |
| 1                          | 1.275495000  | 3.048503000  | -1.974963000 | 1                          | 0.951689000  | 2.919513000  | -1.676547000 |
| 6                          | 2.833368000  | 3.728980000  | 0.722579000  | 6                          | 3.521991000  | 3.766075000  | -0.080462000 |
| 1                          | 3.650440000  | 3.027828000  | 0.578861000  | 1                          | 4.178354000  | 3.061193000  | -0.584112000 |
| 6                          | -3.303389000 | 1.302674000  | -0.480663000 | 6                          | -3.134490000 | 1.725947000  | -0.119536000 |
| 1                          | -3.498965000 | 1.836761000  | 0.442056000  | 1                          | -3.407674000 | 1.942373000  | 0.907595000  |
| 1                          | 2.994996000  | 4.521979000  | 1.444941000  | 1                          | 4.000910000  | 4.594095000  | 0.434527000  |
| 1                          | -4.164130000 | 0.834015000  | -0.940151000 | 1                          | -3.963226000 | 1.577192000  | -0.801072000 |
| 9                          | 4.982844000  | -2.327314000 | 0.181193000  | 9                          | 4.944387000  | -2.749233000 | 0.103500000  |
| E= -2156.48712258 Hartrees |              |              |              | E= -2156.52129860 Hartrees |              |              |              |
| <b>2h</b>                  |              |              |              | <b>2h'</b>                 |              |              |              |
| 24                         | -2.558849000 | -0.838192000 | 0.051541000  | 24                         | -2.700553000 | -0.824562000 | 0.066840000  |
| 6                          | -2.296259000 | -1.630984000 | -1.664719000 | 6                          | -2.434942000 | -1.346303000 | -1.736287000 |
| 8                          | -2.102362000 | -2.128892000 | -2.683335000 | 8                          | -2.242677000 | -1.682921000 | -2.825474000 |
| 6                          | -3.793426000 | -2.186248000 | 0.519031000  | 6                          | -4.060940000 | -2.056225000 | 0.324861000  |
| 8                          | -4.533373000 | -3.018225000 | 0.816229000  | 8                          | -4.904177000 | -2.842877000 | 0.487376000  |
| 6                          | -2.704751000 | -0.071863000 | 1.789490000  | 6                          | -2.711643000 | -0.247173000 | 1.876436000  |
| 8                          | -2.748118000 | 0.354291000  | 2.858279000  | 8                          | -2.669804000 | 0.042897000  | 2.994331000  |
| 6                          | -1.214602000 | -1.960383000 | 0.713465000  | 6                          | -1.548089000 | -2.170194000 | 0.639099000  |
| 8                          | -0.423096000 | -2.684079000 | 1.130313000  | 8                          | -0.923963000 | -3.060691000 | 1.033014000  |
| 6                          | -1.146303000 | 0.658257000  | -0.357184000 | 6                          | -1.045733000 | 0.632211000  | -0.195683000 |

|   |              |              |              |   |              |              |              |
|---|--------------|--------------|--------------|---|--------------|--------------|--------------|
| 7 | -1.553603000 | 1.886057000  | -0.632578000 | 7 | -1.438619000 | 1.976519000  | -0.215807000 |
| 6 | 0.323982000  | 0.447482000  | -0.282123000 | 6 | 0.359568000  | 0.370148000  | -0.134803000 |
| 6 | 1.039911000  | 0.749213000  | 0.883880000  | 6 | 1.297358000  | 1.259727000  | 0.487652000  |
| 6 | 1.014826000  | -0.122811000 | -1.358949000 | 6 | 0.937090000  | -0.823155000 | -0.665794000 |
| 6 | 2.404683000  | 0.493768000  | 0.963363000  | 6 | 2.647320000  | 0.984062000  | 0.554704000  |
| 1 | 0.526414000  | 1.182750000  | 1.735820000  | 1 | 0.928461000  | 2.159017000  | 0.967357000  |
| 6 | 2.382863000  | -0.360448000 | -1.278074000 | 6 | 2.291940000  | -1.071618000 | -0.627548000 |
| 1 | 0.477732000  | -0.397585000 | -2.260848000 | 1 | 0.288975000  | -1.548521000 | -1.141620000 |
| 6 | 3.107562000  | -0.061026000 | -0.115723000 | 6 | 3.212429000  | -0.180500000 | -0.018254000 |
| 1 | 2.936543000  | 0.750202000  | 1.873875000  | 1 | 3.291497000  | 1.704926000  | 1.050783000  |
| 1 | 2.887863000  | -0.821798000 | -2.120443000 | 1 | 2.651055000  | -2.005038000 | -1.050506000 |
| 6 | -0.794645000 | 4.092676000  | 0.255795000  | 6 | -0.512790000 | 4.293686000  | -0.191409000 |
| 1 | -1.781608000 | 4.495343000  | 0.475475000  | 1 | -1.395343000 | 4.700029000  | 0.301647000  |
| 6 | -3.687443000 | 0.828779000  | -1.114107000 | 6 | -3.634464000 | 1.101725000  | -0.805663000 |
| 1 | -3.566861000 | 0.593613000  | -2.167029000 | 1 | -3.480158000 | 1.049204000  | -1.879722000 |
| 6 | -3.015301000 | 2.092889000  | -0.665869000 | 6 | -2.878715000 | 2.196797000  | -0.105096000 |
| 1 | -3.227730000 | 2.921013000  | -1.351456000 | 1 | -3.121355000 | 3.170829000  | -0.551773000 |
| 1 | -3.360492000 | 2.390608000  | 0.329766000  | 1 | -3.186223000 | 2.250680000  | 0.946195000  |
| 6 | -0.707333000 | 3.085057000  | -0.859969000 | 6 | -0.715571000 | 3.016429000  | -0.965851000 |
| 1 | 0.319145000  | 2.756010000  | -1.002394000 | 1 | 0.242968000  | 2.617719000  | -1.290311000 |
| 1 | -1.047406000 | 3.536261000  | -1.799447000 | 1 | -1.287280000 | 3.247708000  | -1.882540000 |
| 6 | 0.256872000  | 4.526225000  | 0.944979000  | 6 | 0.643028000  | 4.946952000  | -0.088949000 |
| 1 | 1.259194000  | 4.151674000  | 0.758204000  | 1 | 1.553484000  | 4.572046000  | -0.548661000 |
| 6 | -4.665310000 | 0.186440000  | -0.401496000 | 6 | -4.688418000 | 0.418881000  | -0.254255000 |
| 1 | -5.015505000 | 0.567419000  | 0.550934000  | 1 | -5.045611000 | 0.648246000  | 0.743744000  |
| 1 | 0.154550000  | 5.275395000  | 1.722913000  | 1 | 0.726295000  | 5.874853000  | 0.469520000  |
| 1 | -5.313360000 | -0.534464000 | -0.883068000 | 1 | -5.374805000 | -0.141493000 | -0.877307000 |
| 6 | 4.563958000  | -0.332233000 | -0.026670000 | 6 | 4.651551000  | -0.451994000 | 0.023344000  |
| 6 | 5.127995000  | -0.861392000 | 1.143969000  | 6 | 5.492470000  | 0.112004000  | 1.011662000  |
| 6 | 5.414377000  | -0.068818000 | -1.111084000 | 6 | 5.278380000  | -1.294369000 | -0.925084000 |
| 6 | 6.494297000  | -1.116707000 | 1.227746000  | 6 | 6.858013000  | -0.144168000 | 1.045619000  |
| 6 | 6.780791000  | -0.323647000 | -1.027894000 | 6 | 6.643378000  | -1.553392000 | -0.886665000 |
| 6 | 7.327068000  | -0.848588000 | 0.142355000  | 6 | 7.453006000  | -0.980886000 | 0.097572000  |
| 1 | 4.486259000  | -1.102424000 | 1.985213000  | 1 | 5.059450000  | 0.738738000  | 1.783830000  |
| 1 | 5.005486000  | 0.361733000  | -2.019627000 | 1 | 4.685409000  | -1.730959000 | -1.721372000 |
| 1 | 6.907269000  | -1.536468000 | 2.139640000  | 1 | 7.463819000  | 0.303405000  | 1.829742000  |
| 1 | 7.421141000  | -0.104811000 | -1.876723000 | 1 | 7.083108000  | -2.201459000 | -1.640818000 |
| 1 | 8.391682000  | -1.048858000 | 0.207104000  | 1 | 8.519478000  | -1.183209000 | 0.126674000  |

E= -2288.32245560 Hartrees

E=-2288.35979730 Hartrees

**2i**

|    |              |              |              |
|----|--------------|--------------|--------------|
| 24 | -2.271445000 | -0.728409000 | 0.081576000  |
| 6  | -2.062616000 | -1.598583000 | -1.604064000 |
| 8  | -1.899107000 | -2.142151000 | -2.604433000 |
| 6  | -3.599143000 | -1.968656000 | 0.595743000  |
| 8  | -4.395331000 | -2.734837000 | 0.921204000  |
| 6  | -2.363995000 | 0.115532000  | 1.788136000  |
| 8  | -2.377113000 | 0.589236000  | 2.837211000  |
| 6  | -1.011341000 | -1.917706000 | 0.789594000  |
| 8  | -0.271635000 | -2.678723000 | 1.233910000  |
| 6  | -0.757719000 | 0.647236000  | -0.381096000 |

**2i'**

|    |              |              |              |
|----|--------------|--------------|--------------|
| 24 | -2.421356000 | -0.700486000 | 0.013432000  |
| 6  | -2.169436000 | -1.056562000 | -1.830523000 |
| 8  | -1.976033000 | -1.294665000 | -2.945764000 |
| 6  | -3.886274000 | -1.824752000 | 0.150984000  |
| 8  | -4.796526000 | -2.547120000 | 0.238043000  |
| 6  | -2.377422000 | -0.297102000 | 1.867827000  |
| 8  | -2.300454000 | -0.117077000 | 3.007124000  |
| 6  | -1.402633000 | -2.191998000 | 0.449100000  |
| 8  | -0.863334000 | -3.171117000 | 0.751510000  |
| 6  | -0.649356000 | 0.633273000  | -0.123092000 |

|                           |              |              |              |                           |              |              |              |
|---------------------------|--------------|--------------|--------------|---------------------------|--------------|--------------|--------------|
| 7                         | -1.075778000 | 1.888851000  | -0.706830000 | 7                         | -0.917342000 | 2.017748000  | -0.015632000 |
| 6                         | 0.694473000  | 0.336426000  | -0.284625000 | 6                         | 0.734313000  | 0.258207000  | -0.074777000 |
| 6                         | 1.424197000  | 0.664445000  | 0.865824000  | 6                         | 1.728380000  | 1.044815000  | 0.595451000  |
| 6                         | 1.341374000  | -0.357010000 | -1.315338000 | 6                         | 1.217406000  | -0.941394000 | -0.678739000 |
| 6                         | 2.767905000  | 0.317838000  | 0.982581000  | 6                         | 3.063254000  | 0.673617000  | 0.648104000  |
| 1                         | 0.938804000  | 1.184022000  | 1.685148000  | 1                         | 1.419622000  | 1.938045000  | 1.125932000  |
| 6                         | 2.689383000  | -0.692724000 | -1.214375000 | 6                         | 2.551138000  | -1.310222000 | -0.646020000 |
| 1                         | 0.790325000  | -0.645400000 | -2.204142000 | 1                         | 0.520890000  | -1.576767000 | -1.210359000 |
| 6                         | 3.394357000  | -0.353109000 | -0.063543000 | 6                         | 3.478103000  | -0.499969000 | 0.017600000  |
| 1                         | 3.318295000  | 0.567023000  | 1.882054000  | 1                         | 3.776307000  | 1.285557000  | 1.191382000  |
| 1                         | 3.179576000  | -1.224042000 | -2.021449000 | 1                         | 2.872446000  | -2.223019000 | -1.135881000 |
| 6                         | -0.158002000 | 4.074945000  | 0.079233000  | 6                         | 0.162070000  | 4.263033000  | -0.048315000 |
| 1                         | -1.116910000 | 4.542153000  | 0.295063000  | 1                         | -0.667807000 | 4.731817000  | 0.479485000  |
| 6                         | -3.281539000 | 0.968008000  | -1.148531000 | 6                         | -3.184673000 | 1.383270000  | -0.668307000 |
| 1                         | -3.182491000 | 0.686805000  | -2.192371000 | 1                         | -3.032639000 | 1.416838000  | -1.743535000 |
| 6                         | -2.519637000 | 2.196420000  | -0.746678000 | 6                         | -2.336251000 | 2.335778000  | 0.131110000  |
| 1                         | -2.675568000 | 3.013219000  | -1.460292000 | 1                         | -2.505187000 | 3.367232000  | -0.207010000 |
| 1                         | -2.838941000 | 2.552088000  | 0.238670000  | 1                         | -2.632835000 | 2.302248000  | 1.185864000  |
| 6                         | -0.148043000 | 3.013704000  | -0.989263000 | 6                         | -0.160900000 | 3.002452000  | -0.808915000 |
| 1                         | 0.852271000  | 2.608076000  | -1.120698000 | 1                         | 0.757616000  | 2.540005000  | -1.164059000 |
| 1                         | -0.461035000 | 3.445030000  | -1.947320000 | 1                         | -0.745125000 | 3.268522000  | -1.709194000 |
| 6                         | 0.928958000  | 4.481650000  | 0.728587000  | 6                         | 1.365538000  | 4.830589000  | 0.008141000  |
| 1                         | 1.905920000  | 4.044661000  | 0.542779000  | 1                         | 2.227399000  | 4.390997000  | -0.486959000 |
| 6                         | -4.300596000 | 0.425641000  | -0.411206000 | 6                         | -4.293637000 | 0.743678000  | -0.178225000 |
| 1                         | -4.618392000 | 0.867726000  | 0.526037000  | 1                         | -4.630007000 | 0.905049000  | 0.840230000  |
| 1                         | 0.883248000  | 5.272146000  | 1.470061000  | 1                         | 1.538588000  | 5.749127000  | 0.561600000  |
| 1                         | -5.000984000 | -0.264200000 | -0.864135000 | 1                         | -5.024139000 | 0.303679000  | -0.846150000 |
| 35                        | 5.239669000  | -0.822343000 | 0.086616000  | 35                        | 5.346053000  | -0.998639000 | 0.046571000  |
| E=-4630.76435370 Hartrees |              |              |              | E=-4630.79978786 Hartrees |              |              |              |
| <b>2j</b>                 |              |              |              | <b>2j</b>                 |              |              |              |
| 24                        | -1.871376000 | -0.584422000 | 0.080616000  | 24                        | -2.009034000 | -0.522136000 | 0.015731000  |
| 6                         | -1.766937000 | -1.492913000 | -1.593123000 | 6                         | -1.822362000 | -0.936872000 | -1.824067000 |
| 8                         | -1.672879000 | -2.067189000 | -2.585773000 | 8                         | -1.676314000 | -1.214812000 | -2.937109000 |
| 6                         | -3.341964000 | -1.647903000 | 0.597199000  | 6                         | -3.609977000 | -1.439293000 | 0.175994000  |
| 8                         | -4.227804000 | -2.308286000 | 0.924275000  | 8                         | -4.608407000 | -2.031308000 | 0.277998000  |
| 6                         | -1.875566000 | 0.277814000  | 1.781227000  | 6                         | -1.906524000 | -0.099462000 | 1.863815000  |
| 8                         | -1.844376000 | 0.754671000  | 2.828497000  | 8                         | -1.803983000 | 0.086924000  | 3.000033000  |
| 6                         | -0.766241000 | -1.907925000 | 0.808824000  | 6                         | -1.190959000 | -2.128173000 | 0.471869000  |
| 8                         | -0.124766000 | -2.746595000 | 1.266028000  | 8                         | -0.782856000 | -3.163821000 | 0.789760000  |
| 6                         | -0.192629000 | 0.590852000  | -0.378030000 | 6                         | -0.074691000 | 0.561488000  | -0.137927000 |
| 7                         | -0.355661000 | 1.861506000  | -0.709503000 | 7                         | -0.159153000 | 1.966578000  | -0.046278000 |
| 6                         | 1.209911000  | 0.108819000  | -0.266388000 | 6                         | 1.243744000  | 0.002236000  | -0.089336000 |
| 6                         | 1.996730000  | 0.417430000  | 0.851886000  | 6                         | 2.337746000  | 0.646342000  | 0.578919000  |
| 6                         | 1.753081000  | -0.729897000 | -1.247277000 | 6                         | 1.558713000  | -1.254030000 | -0.691686000 |
| 6                         | 3.283029000  | -0.093694000 | 0.984143000  | 6                         | 3.603159000  | 0.089047000  | 0.633842000  |
| 1                         | 1.594526000  | 1.046943000  | 1.638649000  | 1                         | 2.155347000  | 1.575682000  | 1.106056000  |
| 6                         | 3.050658000  | -1.218229000 | -1.133477000 | 6                         | 2.829443000  | -1.794924000 | -0.657089000 |
| 1                         | 1.159293000  | -1.006156000 | -2.112107000 | 1                         | 0.781936000  | -1.785377000 | -1.226944000 |
| 6                         | 3.827126000  | -0.910908000 | -0.012265000 | 6                         | 3.880836000  | -1.139898000 | 0.012701000  |
| 1                         | 3.861341000  | 0.140441000  | 1.872361000  | 1                         | 4.392230000  | 0.599500000  | 1.179343000  |

|                            |              |              |              |                            |              |              |              |
|----------------------------|--------------|--------------|--------------|----------------------------|--------------|--------------|--------------|
| 1                          | 3.447301000  | -1.851475000 | -1.920490000 | 1                          | 3.022875000  | -2.740344000 | -1.155110000 |
| 6                          | 0.811908000  | 3.939190000  | 0.041392000  | 6                          | 1.225174000  | 4.039509000  | -0.032137000 |
| 1                          | -0.089301000 | 4.513048000  | 0.248696000  | 1                          | 0.461106000  | 4.616166000  | 0.488286000  |
| 6                          | -2.652500000 | 1.213611000  | -1.167849000 | 6                          | -2.488309000 | 1.632396000  | -0.694527000 |
| 1                          | -2.576255000 | 0.914020000  | -2.208566000 | 1                          | -2.332876000 | 1.630790000  | -1.769742000 |
| 6                          | -1.750465000 | 2.342812000  | -0.765422000 | 6                          | -1.521776000 | 2.475317000  | 0.092284000  |
| 1                          | -1.799385000 | 3.166469000  | -1.486610000 | 1                          | -1.549728000 | 3.514191000  | -0.263797000 |
| 1                          | -2.033331000 | 2.743734000  | 0.213679000  | 1                          | -1.822310000 | 2.500869000  | 1.146426000  |
| 6                          | 0.701742000  | 2.861456000  | -1.004536000 | 6                          | 0.738881000  | 2.846383000  | -0.814231000 |
| 1                          | 1.646923000  | 2.336371000  | -1.119491000 | 1                          | 1.586738000  | 2.264063000  | -1.168698000 |
| 1                          | 0.447972000  | 3.307974000  | -1.973378000 | 1                          | 0.206837000  | 3.204671000  | -1.714530000 |
| 6                          | 1.939416000  | 4.239844000  | 0.679364000  | 6                          | 2.495936000  | 4.429102000  | 0.049791000  |
| 1                          | 2.862338000  | 3.695373000  | 0.501332000  | 1                          | 3.294582000  | 3.875570000  | -0.436808000 |
| 6                          | -3.738417000 | 0.803454000  | -0.440305000 | 6                          | -3.672679000 | 1.152973000  | -0.197500000 |
| 1                          | -4.012162000 | 1.286705000  | 0.490466000  | 1                          | -3.984385000 | 1.371532000  | 0.818116000  |
| 1                          | 1.982838000  | 5.046853000  | 1.403008000  | 1                          | 2.788515000  | 5.307762000  | 0.617544000  |
| 1                          | -4.511813000 | 0.200480000  | -0.898508000 | 1                          | -4.455463000 | 0.805329000  | -0.860643000 |
| 16                         | 5.496745000  | -1.500422000 | 0.208588000  | 16                         | 5.536291000  | -1.826321000 | 0.036925000  |
| 1                          | 5.499776000  | -2.362130000 | -0.831109000 | 1                          | 5.419166000  | -2.662771000 | 1.106346000  |
| E= -2455.42875948 Hartrees |              |              |              | E= -2455.46635313 Hartrees |              |              |              |
| <b>2k</b>                  |              |              |              | <b>2k'</b>                 |              |              |              |
| 24                         | -1.818375000 | -0.612688000 | 0.069192000  | 24                         | -1.934583000 | -0.561337000 | 0.018726000  |
| 6                          | -1.619244000 | -1.580412000 | -1.563147000 | 6                          | -1.698085000 | -1.123852000 | -1.776153000 |
| 8                          | -1.469623000 | -2.188441000 | -2.528165000 | 8                          | -1.530840000 | -1.490890000 | -2.859607000 |
| 6                          | -3.288968000 | -1.687893000 | 0.559964000  | 6                          | -3.504404000 | -1.525298000 | 0.215187000  |
| 8                          | -4.175481000 | -2.354437000 | 0.872595000  | 8                          | -4.482928000 | -2.144597000 | 0.340086000  |
| 6                          | -1.914871000 | 0.311497000  | 1.732946000  | 6                          | -1.918415000 | 0.007778000  | 1.830291000  |
| 8                          | -1.939209000 | 0.827782000  | 2.761708000  | 8                          | -1.875251000 | 0.284279000  | 2.951674000  |
| 6                          | -0.720432000 | -1.884715000 | 0.894703000  | 6                          | -1.067207000 | -2.093218000 | 0.626801000  |
| 8                          | -0.084982000 | -2.692354000 | 1.411973000  | 8                          | -0.631501000 | -3.081880000 | 1.039055000  |
| 6                          | -0.148770000 | 0.583667000  | -0.362705000 | 6                          | -0.031991000 | 0.573659000  | -0.161242000 |
| 7                          | -0.322743000 | 1.835506000  | -0.752240000 | 7                          | -0.178116000 | 1.966592000  | -0.174432000 |
| 6                          | 1.256251000  | 0.133737000  | -0.181413000 | 6                          | 1.297046000  | 0.060404000  | -0.053548000 |
| 6                          | 1.972453000  | 0.440977000  | 0.981514000  | 6                          | 2.363563000  | 0.762493000  | 0.603691000  |
| 6                          | 1.872799000  | -0.673002000 | -1.150696000 | 6                          | 1.659372000  | -1.220744000 | -0.579348000 |
| 6                          | 3.266064000  | -0.038469000 | 1.159710000  | 6                          | 3.636460000  | 0.239981000  | 0.698289000  |
| 1                          | 1.512547000  | 1.045435000  | 1.756327000  | 1                          | 2.148137000  | 1.704596000  | 1.094569000  |
| 6                          | 3.170398000  | -1.131218000 | -0.973356000 | 6                          | 2.938537000  | -1.719364000 | -0.506308000 |
| 1                          | 1.327570000  | -0.948708000 | -2.047392000 | 1                          | 0.902659000  | -1.801675000 | -1.091891000 |
| 6                          | 3.900180000  | -0.825510000 | 0.187253000  | 6                          | 3.990026000  | -1.008962000 | 0.134258000  |
| 1                          | 3.796986000  | 0.203089000  | 2.076137000  | 1                          | 4.396706000  | 0.801649000  | 1.239957000  |
| 1                          | 3.613409000  | -1.749371000 | -1.746611000 | 1                          | 3.143083000  | -2.688095000 | -0.953228000 |
| 6                          | 0.769601000  | 3.955518000  | -0.010661000 | 6                          | 1.146612000  | 4.078491000  | -0.057933000 |
| 1                          | -0.146774000 | 4.525908000  | 0.128862000  | 1                          | 0.329795000  | 4.627760000  | 0.409325000  |
| 6                          | -2.583000000 | 1.119684000  | -1.283593000 | 6                          | -2.465143000 | 1.500852000  | -0.872442000 |
| 1                          | -2.454704000 | 0.781089000  | -2.307032000 | 1                          | -2.272608000 | 1.424437000  | -1.938862000 |
| 6                          | -1.723027000 | 2.283822000  | -0.888204000 | 6                          | -1.559421000 | 2.441372000  | -0.126869000 |
| 1                          | -1.756293000 | 3.077162000  | -1.643473000 | 1                          | -1.602211000 | 3.443653000  | -0.575218000 |
| 1                          | -2.057332000 | 2.716609000  | 0.060503000  | 1                          | -1.902292000 | 2.549415000  | 0.909380000  |
| 6                          | 0.728427000  | 2.847280000  | -1.029274000 | 6                          | 0.754319000  | 2.869665000  | -0.868601000 |

|                           |              |              |              |                            |              |              |              |
|---------------------------|--------------|--------------|--------------|----------------------------|--------------|--------------|--------------|
| 1                         | 1.687395000  | 2.337611000  | -1.084308000 | 1                          | 1.639818000  | 2.309661000  | -1.160271000 |
| 1                         | 0.512337000  | 3.260216000  | -2.021748000 | 1                          | 0.276254000  | 3.213661000  | -1.803273000 |
| 6                         | 1.856090000  | 4.284048000  | 0.682288000  | 6                          | 2.394545000  | 4.513865000  | 0.104473000  |
| 1                         | 2.791568000  | 3.742988000  | 0.572899000  | 1                          | 3.242391000  | 3.988846000  | -0.327198000 |
| 6                         | -3.690375000 | 0.713845000  | -0.586908000 | 6                          | -3.649659000 | 1.017261000  | -0.377197000 |
| 1                         | -4.013135000 | 1.226785000  | 0.311705000  | 1                          | -4.006925000 | 1.305672000  | 0.605394000  |
| 1                         | 1.851303000  | 5.110557000  | 1.384951000  | 1                          | 2.617397000  | 5.403426000  | 0.686628000  |
| 1                         | -4.430697000 | 0.076175000  | -1.052619000 | 1                          | -4.395624000 | 0.591303000  | -1.037092000 |
| 6                         | 5.273052000  | -1.294479000 | 0.426941000  | 6                          | 5.347378000  | -1.496040000 | 0.239481000  |
| 1                         | 5.682525000  | -1.019123000 | 1.397507000  | 1                          | 6.022458000  | -0.829670000 | 0.779780000  |
| 6                         | 6.049613000  | -2.001572000 | -0.400321000 | 6                          | 5.879402000  | -2.646756000 | -0.235303000 |
| 1                         | 5.728132000  | -2.318759000 | -1.387088000 | 1                          | 5.297998000  | -3.380135000 | -0.784991000 |
| 1                         | 7.052275000  | -2.292900000 | -0.108668000 | 1                          | 6.926333000  | -2.883374000 | -0.076246000 |
| E=-2134.63388895 Hartrees |              |              |              | E= -2134.67298854 Hartrees |              |              |              |
| <b>2l</b>                 |              |              |              | <b>2l'</b>                 |              |              |              |
| 24                        | -2.272634000 | -0.924279000 | 0.083190000  | 24                         | -2.504026000 | -0.853708000 | 0.037566000  |
| 6                         | -1.992084000 | -1.705161000 | -1.636589000 | 6                          | -2.407669000 | -1.044932000 | -1.844823000 |
| 8                         | -1.784924000 | -2.191109000 | -2.657995000 | 8                          | -2.305655000 | -1.177896000 | -2.989322000 |
| 6                         | -3.336736000 | -2.396141000 | 0.603377000  | 6                          | -3.814571000 | -2.150040000 | 0.218386000  |
| 8                         | -3.969155000 | -3.300987000 | 0.931176000  | 8                          | -4.625662000 | -2.978950000 | 0.329783000  |
| 6                         | -2.448772000 | -0.162133000 | 1.821608000  | 6                          | -2.313331000 | -0.580157000 | 1.907219000  |
| 8                         | -2.509320000 | 0.267578000  | 2.887717000  | 8                          | -2.139497000 | -0.471938000 | 3.044692000  |
| 6                         | -0.791093000 | -1.886753000 | 0.701605000  | 6                          | -1.288417000 | -2.242981000 | 0.249638000  |
| 8                         | 0.092773000  | -2.511963000 | 1.090585000  | 8                          | -0.616822000 | -3.171341000 | 0.416379000  |
| 6                         | -1.049416000 | 0.708673000  | -0.387215000 | 6                          | -0.914834000 | 0.687069000  | -0.154867000 |
| 7                         | -1.591436000 | 1.885961000  | -0.649560000 | 7                          | -1.323679000 | 2.020709000  | 0.078302000  |
| 6                         | 0.438390000  | 0.651964000  | -0.374465000 | 6                          | 0.500168000  | 0.479605000  | -0.268186000 |
| 6                         | 1.161826000  | 1.021092000  | 0.767743000  | 6                          | 1.461544000  | 1.345903000  | 0.351808000  |
| 6                         | 1.134110000  | 0.163979000  | -1.488621000 | 6                          | 1.049580000  | -0.615935000 | -1.001751000 |
| 6                         | 2.549564000  | 0.914583000  | 0.795542000  | 6                          | 2.827052000  | 1.134994000  | 0.246849000  |
| 1                         | 0.639092000  | 1.388022000  | 1.644200000  | 1                          | 1.108245000  | 2.168297000  | 0.961946000  |
| 6                         | 2.522549000  | 0.065191000  | -1.471651000 | 6                          | 2.412412000  | -0.821851000 | -1.120664000 |
| 1                         | 0.590373000  | -0.146392000 | -2.374265000 | 1                          | 0.376959000  | -1.292856000 | -1.511448000 |
| 6                         | 3.212885000  | 0.436288000  | -0.326306000 | 6                          | 3.298426000  | 0.050689000  | -0.488009000 |
| 1                         | 3.111923000  | 1.199542000  | 1.676821000  | 1                          | 3.528904000  | 1.797774000  | 0.743541000  |
| 1                         | 3.065876000  | -0.301954000 | -2.334343000 | 1                          | 2.795950000  | -1.651241000 | -1.705701000 |
| 6                         | -1.025867000 | 4.158192000  | 0.215014000  | 6                          | -0.514916000 | 4.378190000  | 0.077912000  |
| 1                         | -2.038888000 | 4.437322000  | 0.498215000  | 1                          | -1.327254000 | 4.719378000  | 0.718735000  |
| 6                         | -3.616588000 | 0.606243000  | -1.046170000 | 6                          | -3.563495000 | 1.167650000  | -0.395744000 |
| 1                         | -3.506145000 | 0.381528000  | -2.102551000 | 1                          | -3.531854000 | 1.293834000  | -1.474380000 |
| 6                         | -3.067123000 | 1.935747000  | -0.620481000 | 6                          | -2.744780000 | 2.154754000  | 0.392291000  |
| 1                         | -3.395548000 | 2.736282000  | -1.292744000 | 1                          | -3.063617000 | 3.180457000  | 0.162503000  |
| 1                         | -3.399620000 | 2.194099000  | 0.390435000  | 1                          | -2.918119000 | 2.008928000  | 1.464593000  |
| 6                         | -0.886628000 | 3.166812000  | -0.910023000 | 6                          | -0.780781000 | 3.130929000  | -0.725355000 |
| 1                         | 0.161020000  | 2.949272000  | -1.104026000 | 1                          | 0.135691000  | 2.801152000  | -1.210346000 |
| 1                         | -1.316282000 | 3.580545000  | -1.829753000 | 1                          | -1.492613000 | 3.373170000  | -1.535672000 |
| 6                         | 0.005990000  | 4.720421000  | 0.837587000  | 6                          | 0.618255000  | 5.077017000  | 0.045455000  |
| 1                         | 1.033156000  | 4.473499000  | 0.584736000  | 1                          | 1.462333000  | 4.766861000  | -0.564890000 |
| 6                         | -4.493348000 | -0.135935000 | -0.300485000 | 6                          | -4.535696000 | 0.368267000  | 0.146833000  |
| 1                         | -4.849956000 | 0.207054000  | 0.663774000  | 1                          | -4.776979000 | 0.416396000  | 1.203146000  |



|                           |              |              |              |                           |              |              |              |
|---------------------------|--------------|--------------|--------------|---------------------------|--------------|--------------|--------------|
| 1                         | -0.137940000 | 5.454132000  | 1.623486000  | 1                         | 0.750634000  | 5.978773000  | 0.636375000  |
| 1                         | -5.074747000 | -0.925122000 | -0.759599000 | 1                         | -5.279896000 | -0.107819000 | -0.479940000 |
| 8                         | 4.621811000  | 0.405068000  | -0.339306000 | 8                         | 4.706158000  | -0.102988000 | -0.695173000 |
| 6                         | 5.240236000  | -0.699485000 | 0.132924000  | 6                         | 5.394937000  | -0.837548000 | 0.177564000  |
| 9                         | 4.890537000  | -1.818843000 | -0.532723000 | 9                         | 4.985831000  | -2.125819000 | 0.255993000  |
| 9                         | 6.554949000  | -0.520968000 | -0.007055000 | 9                         | 6.686583000  | -0.851384000 | -0.211415000 |
| 9                         | 4.981638000  | -0.924300000 | 1.438466000  | 9                         | 5.365645000  | -0.353229000 | 1.444715000  |
| E=-2469.60707763 Hartrees |              |              |              | E=-2469.64840983 Hartrees |              |              |              |
| <b>2m</b>                 |              |              |              | <b>2m'</b>                |              |              |              |
| 24                        | -1.773874000 | -0.548613000 | 0.075884000  | 24                        | -1.921417000 | -0.453918000 | 0.021180000  |
| 6                         | -1.671367000 | -1.469093000 | -1.593942000 | 6                         | -1.769648000 | -0.970361000 | -1.796470000 |
| 8                         | -1.576378000 | -2.049091000 | -2.582211000 | 8                         | -1.651603000 | -1.312531000 | -2.894357000 |
| 6                         | -3.285834000 | -1.566401000 | 0.575359000  | 6                         | -3.565428000 | -1.286923000 | 0.220215000  |
| 8                         | -4.194459000 | -2.198551000 | 0.892310000  | 8                         | -4.590038000 | -1.825024000 | 0.345994000  |
| 6                         | -1.779191000 | 0.320642000  | 1.773281000  | 6                         | -1.818767000 | 0.046533000  | 1.850895000  |
| 8                         | -1.748091000 | 0.801380000  | 2.818483000  | 8                         | -1.725976000 | 0.278654000  | 2.978961000  |
| 6                         | -0.721642000 | -1.902731000 | 0.823680000  | 6                         | -1.178856000 | -2.074952000 | 0.555470000  |
| 8                         | -0.109994000 | -2.757514000 | 1.291888000  | 8                         | -0.819041000 | -3.111403000 | 0.921713000  |
| 6                         | -0.067054000 | 0.575363000  | -0.373243000 | 6                         | 0.063173000  | 0.522395000  | -0.166876000 |
| 7                         | -0.180358000 | 1.845340000  | -0.722512000 | 7                         | 0.041035000  | 1.923174000  | -0.135694000 |
| 6                         | 1.315939000  | 0.039515000  | -0.256154000 | 6                         | 1.346649000  | -0.104671000 | -0.099207000 |
| 6                         | 2.048808000  | 0.191993000  | 0.929491000  | 6                         | 2.473776000  | 0.490381000  | 0.565661000  |
| 6                         | 1.880601000  | -0.694139000 | -1.308948000 | 6                         | 1.590091000  | -1.395337000 | -0.667382000 |
| 6                         | 3.316798000  | -0.360801000 | 1.057719000  | 6                         | 3.703350000  | -0.128817000 | 0.638033000  |
| 1                         | 1.620805000  | 0.736726000  | 1.763910000  | 1                         | 2.339850000  | 1.433965000  | 1.080931000  |
| 6                         | 3.152698000  | -1.240922000 | -1.193465000 | 6                         | 2.822781000  | -2.007141000 | -0.620237000 |
| 1                         | 1.318798000  | -0.847540000 | -2.223930000 | 1                         | 0.783499000  | -1.895234000 | -1.187652000 |
| 6                         | 3.873591000  | -1.072888000 | -0.008219000 | 6                         | 3.909802000  | -1.383320000 | 0.030286000  |
| 1                         | 3.878923000  | -0.248693000 | 1.977486000  | 1                         | 4.521280000  | 0.336389000  | 1.180367000  |
| 1                         | 3.588563000  | -1.804592000 | -2.009976000 | 1                         | 2.970968000  | -2.976439000 | -1.085388000 |
| 6                         | 1.042625000  | 3.864026000  | 0.089187000  | 6                         | 1.549580000  | 3.907956000  | -0.017277000 |
| 1                         | 0.164697000  | 4.480011000  | 0.273446000  | 1                         | 0.799786000  | 4.514083000  | 0.490083000  |
| 6                         | -2.491928000 | 1.268395000  | -1.198976000 | 6                         | -2.294014000 | 1.680247000  | -0.788363000 |
| 1                         | -2.416732000 | 0.954828000  | -2.235602000 | 1                         | -2.132953000 | 1.624136000  | -1.861255000 |
| 6                         | -1.557837000 | 2.372577000  | -0.800349000 | 6                         | -1.293052000 | 2.512107000  | -0.035111000 |
| 1                         | -1.570879000 | 3.187650000  | -1.532436000 | 1                         | -1.259975000 | 3.530273000  | -0.446366000 |
| 1                         | -1.836860000 | 2.794886000  | 0.170578000  | 1                         | -1.599818000 | 2.609566000  | 1.013226000  |
| 6                         | 0.918219000  | 2.811216000  | -0.980275000 | 6                         | 1.026331000  | 2.759391000  | -0.841547000 |
| 1                         | 1.846781000  | 2.254518000  | -1.082314000 | 1                         | 1.849795000  | 2.132649000  | -1.176701000 |
| 1                         | 0.703749000  | 3.281460000  | -1.946938000 | 1                         | 0.551221000  | 3.166522000  | -1.751716000 |
| 6                         | 2.158623000  | 4.092476000  | 0.775373000  | 6                         | 2.835624000  | 4.227931000  | 0.112139000  |
| 1                         | 3.058850000  | 3.504699000  | 0.620164000  | 1                         | 3.619805000  | 3.643503000  | -0.361596000 |
| 6                         | -3.594427000 | 0.898390000  | -0.476383000 | 6                         | -3.503460000 | 1.282436000  | -0.278900000 |
| 1                         | -3.860234000 | 1.396723000  | 0.448694000  | 1                         | -3.811369000 | 1.564204000  | 0.722092000  |
| 1                         | 2.216046000  | 4.882033000  | 1.516939000  | 1                         | 3.154934000  | 5.079247000  | 0.706189000  |
| 1                         | -4.381039000 | 0.312965000  | -0.934733000 | 1                         | -4.297993000 | 0.943826000  | -0.932571000 |
| 7                         | 5.141584000  | -1.617887000 | 0.112502000  | 7                         | 5.146381000  | -1.990920000 | 0.078532000  |
| 6                         | 6.218759000  | -2.074439000 | 0.212501000  | 6                         | 6.203123000  | -2.507189000 | 0.119282000  |
| E=-2149.45022933 Hartrees |              |              |              | E=-2149.49872863 Hartrees |              |              |              |

|                            |              |              |              |                            |              |              |              |
|----------------------------|--------------|--------------|--------------|----------------------------|--------------|--------------|--------------|
| <b>2n</b>                  |              |              |              | <b>2n'</b>                 |              |              |              |
| 24                         | -1.772839000 | -0.564651000 | 0.074992000  | 24                         | -1.919124000 | -0.472594000 | 0.026367000  |
| 6                          | -1.654825000 | -1.486924000 | -1.593570000 | 6                          | -1.778371000 | -1.041004000 | -1.777204000 |
| 8                          | -1.550993000 | -2.067090000 | -2.580562000 | 8                          | -1.671121000 | -1.414010000 | -2.865787000 |
| 6                          | -3.275397000 | -1.599099000 | 0.570526000  | 6                          | -3.547762000 | -1.327638000 | 0.260884000  |
| 8                          | -4.177778000 | -2.240898000 | 0.885103000  | 8                          | -4.562288000 | -1.878079000 | 0.409317000  |
| 6                          | -1.796309000 | 0.306969000  | 1.771118000  | 6                          | -1.824670000 | 0.080147000  | 1.841714000  |
| 8                          | -1.776886000 | 0.789685000  | 2.815561000  | 8                          | -1.739772000 | 0.345222000  | 2.962941000  |
| 6                          | -0.708987000 | -1.906545000 | 0.828558000  | 6                          | -1.142495000 | -2.065595000 | 0.601207000  |
| 8                          | -0.090303000 | -2.754255000 | 1.300199000  | 8                          | -0.761342000 | -3.083884000 | 0.993690000  |
| 6                          | -0.081477000 | 0.581087000  | -0.372158000 | 6                          | 0.048890000  | 0.528151000  | -0.194035000 |
| 7                          | -0.207800000 | 1.848413000  | -0.724858000 | 7                          | 0.000761000  | 1.922513000  | -0.198275000 |
| 6                          | 1.305235000  | 0.058236000  | -0.255261000 | 6                          | 1.338415000  | -0.082820000 | -0.117071000 |
| 6                          | 2.021563000  | 0.182776000  | 0.944257000  | 6                          | 2.456860000  | 0.527062000  | 0.551588000  |
| 6                          | 1.889964000  | -0.634117000 | -1.325792000 | 6                          | 1.597106000  | -1.375502000 | -0.676488000 |
| 6                          | 3.295067000  | -0.355908000 | 1.066838000  | 6                          | 3.690316000  | -0.077321000 | 0.629553000  |
| 1                          | 1.575492000  | 0.694967000  | 1.789703000  | 1                          | 2.309464000  | 1.469010000  | 1.066354000  |
| 6                          | 3.166683000  | -1.167801000 | -1.211287000 | 6                          | 2.835818000  | -1.969357000 | -0.626371000 |
| 1                          | 1.339182000  | -0.764039000 | -2.251084000 | 1                          | 0.796197000  | -1.887112000 | -1.194592000 |
| 6                          | 3.882344000  | -1.030348000 | -0.013395000 | 6                          | 3.928884000  | -1.336713000 | 0.023755000  |
| 1                          | 3.839502000  | -0.258672000 | 1.999218000  | 1                          | 4.493929000  | 0.406602000  | 1.177529000  |
| 1                          | 3.611521000  | -1.697794000 | -2.045748000 | 1                          | 2.986308000  | -2.938695000 | -1.091403000 |
| 6                          | 0.988822000  | 3.875143000  | 0.104168000  | 6                          | 1.483177000  | 3.922980000  | -0.002654000 |
| 1                          | 0.104749000  | 4.483309000  | 0.284864000  | 1                          | 0.710312000  | 4.512044000  | 0.489956000  |
| 6                          | -2.510555000 | 1.242729000  | -1.207001000 | 6                          | -2.328557000 | 1.627282000  | -0.840543000 |
| 1                          | -2.427899000 | 0.927126000  | -2.242439000 | 1                          | -2.170226000 | 1.544488000  | -1.912052000 |
| 6                          | -1.591293000 | 2.359204000  | -0.807928000 | 6                          | -1.340436000 | 2.498635000  | -0.116790000 |
| 1                          | -1.611727000 | 3.172424000  | -1.541825000 | 1                          | -1.318747000 | 3.501361000  | -0.565251000 |
| 1                          | -1.878084000 | 2.780104000  | 0.161334000  | 1                          | -1.648845000 | 2.630377000  | 0.927559000  |
| 6                          | 0.881358000  | 2.827780000  | -0.972495000 | 6                          | 1.000174000  | 2.779149000  | -0.857654000 |
| 1                          | 1.816792000  | 2.282281000  | -1.073021000 | 1                          | 1.839910000  | 2.165945000  | -1.176741000 |
| 1                          | 0.666683000  | 3.300848000  | -1.937621000 | 1                          | 0.546368000  | 3.193681000  | -1.774641000 |
| 6                          | 2.097425000  | 4.107456000  | 0.800926000  | 6                          | 2.760206000  | 4.259171000  | 0.167474000  |
| 1                          | 3.003478000  | 3.527761000  | 0.649359000  | 1                          | 3.566000000  | 3.692167000  | -0.290769000 |
| 6                          | -3.610229000 | 0.860840000  | -0.486739000 | 6                          | -3.530285000 | 1.225197000  | -0.315259000 |
| 1                          | -3.884511000 | 1.357917000  | 0.436522000  | 1                          | -3.840239000 | 1.532110000  | 0.677641000  |
| 1                          | 2.142777000  | 4.892643000  | 1.547922000  | 1                          | 3.049804000  | 5.107198000  | 0.781018000  |
| 1                          | -4.387978000 | 0.263994000  | -0.945467000 | 1                          | -4.321286000 | 0.856136000  | -0.956573000 |
| 6                          | 5.199234000  | -1.574689000 | 0.106142000  | 6                          | 5.205518000  | -1.941076000 | 0.075952000  |
| 7                          | 6.266961000  | -2.007201000 | 0.199807000  | 7                          | 6.259165000  | -2.434158000 | 0.118210000  |
| E= -2149.48533523 Hartrees |              |              |              | E= -2149.53842976 Hartrees |              |              |              |
| <b>3a</b>                  |              |              |              | <b>3a'</b>                 |              |              |              |
| 24                         | 1.298962000  | -0.332318000 | 0.060526000  | 24                         | 1.373521000  | -0.341127000 | -0.007641000 |
| 6                          | 1.733392000  | 0.383782000  | 1.773267000  | 6                          | 1.948325000  | 0.296568000  | 1.679352000  |
| 8                          | 2.008047000  | 0.783549000  | 2.815335000  | 8                          | 2.321577000  | 0.650686000  | 2.714714000  |
| 6                          | 2.760702000  | -1.507476000 | 0.202615000  | 6                          | 2.911689000  | -1.339639000 | -0.257805000 |
| 8                          | 3.657390000  | -2.223162000 | 0.291679000  | 8                          | 3.876847000  | -1.968652000 | -0.421523000 |
| 6                          | 0.888528000  | -1.098343000 | -1.652366000 | 6                          | 0.619033000  | -0.865617000 | -1.677764000 |
| 8                          | 0.711512000  | -1.574618000 | -2.678941000 | 8                          | 0.187508000  | -1.159404000 | -2.704598000 |
| 6                          | 2.464385000  | 0.872453000  | -0.845735000 | 6                          | 2.268573000  | 1.073871000  | -0.891369000 |

|                           |              |              |              |                           |              |              |              |
|---------------------------|--------------|--------------|--------------|---------------------------|--------------|--------------|--------------|
| 8                         | 3.219952000  | 1.533531000  | -1.406126000 | 8                         | 2.906064000  | 1.861512000  | -1.451017000 |
| 6                         | 0.236227000  | -1.665720000 | 0.937882000  | 6                         | 0.628268000  | -1.854895000 | 0.889872000  |
| 8                         | -0.339312000 | -2.499045000 | 1.474804000  | 8                         | 0.291334000  | -2.801387000 | 1.452608000  |
| 6                         | -0.436839000 | 0.956662000  | -0.118343000 | 6                         | -0.547905000 | 0.767863000  | 0.184510000  |
| 7                         | -0.487119000 | 2.288457000  | -0.109653000 | 7                         | -0.695460000 | 2.197733000  | 0.244330000  |
| 6                         | -1.647334000 | 3.120275000  | -0.487221000 | 6                         | -0.945179000 | 2.844553000  | -1.040336000 |
| 1                         | -2.133194000 | 3.541849000  | 0.397019000  | 1                         | -1.271753000 | 3.879574000  | -0.880712000 |
| 1                         | -1.285314000 | 3.947406000  | -1.101393000 | 1                         | -0.047313000 | 2.868409000  | -1.682553000 |
| 1                         | -2.370202000 | 2.543547000  | -1.054438000 | 1                         | -1.732801000 | 2.315956000  | -1.577664000 |
| 6                         | 0.668670000  | 3.135772000  | 0.204406000  | 6                         | 0.257590000  | 2.935940000  | 1.049118000  |
| 1                         | 1.425716000  | 2.573537000  | 0.732605000  | 1                         | 0.329375000  | 2.494880000  | 2.042763000  |
| 1                         | 1.095724000  | 3.552523000  | -0.711683000 | 1                         | 1.270723000  | 2.974273000  | 0.616983000  |
| 1                         | 0.335023000  | 3.961227000  | 0.837494000  | 1                         | -0.095675000 | 3.967738000  | 1.162727000  |
| 6                         | -1.751299000 | 0.315788000  | -0.212503000 | 6                         | -1.813461000 | 0.160598000  | 0.099888000  |
| 6                         | -2.943592000 | 0.522702000  | 0.442054000  | 6                         | -3.123295000 | 0.641243000  | 0.268877000  |
| 6                         | -3.814666000 | -0.564731000 | 0.121919000  | 6                         | -4.017413000 | -0.450333000 | 0.099556000  |
| 1                         | -3.167348000 | 1.339592000  | 1.112433000  | 1                         | -3.372782000 | 1.657706000  | 0.533340000  |
| 6                         | -3.093488000 | -1.350940000 | -0.727530000 | 6                         | -3.232039000 | -1.537719000 | -0.168949000 |
| 1                         | -3.320462000 | -2.262282000 | -1.258062000 | 1                         | -3.456571000 | -2.575382000 | -0.363728000 |
| 8                         | -1.849336000 | -0.851644000 | -0.925450000 | 8                         | -1.911205000 | -1.201882000 | -0.178453000 |
| 6                         | -5.209712000 | -0.792197000 | 0.617669000  | 6                         | -5.513012000 | -0.431368000 | 0.203642000  |
| 1                         | -5.637125000 | -1.702828000 | 0.192983000  | 1                         | -5.937739000 | -1.424884000 | 0.031440000  |
| 1                         | -5.232815000 | -0.893750000 | 1.706695000  | 1                         | -5.844697000 | -0.098613000 | 1.193866000  |
| 1                         | -5.871102000 | 0.038569000  | 0.354203000  | 1                         | -5.961120000 | 0.249895000  | -0.528771000 |
| E=-2052.88168819 Hartrees |              |              |              | E=-2052.92758266 Hartrees |              |              |              |
| <b>3b</b>                 |              |              |              | <b>3b'</b>                |              |              |              |
| 24                        | 1.511191000  | -0.427342000 | 0.059242000  | 24                        | 1.605081000  | -0.421940000 | -0.007165000 |
| 6                         | 2.059842000  | 0.235159000  | 1.761336000  | 6                         | 2.257255000  | 0.166361000  | 1.670054000  |
| 8                         | 2.403595000  | 0.597420000  | 2.796465000  | 8                         | 2.676965000  | 0.486356000  | 2.698570000  |
| 6                         | 2.819993000  | -1.771523000 | 0.195933000  | 6                         | 3.037392000  | -1.567909000 | -0.256004000 |
| 8                         | 3.623275000  | -2.590878000 | 0.282371000  | 8                         | 3.935861000  | -2.289008000 | -0.418739000 |
| 6                         | 0.997369000  | -1.156354000 | -1.641916000 | 6                         | 0.800965000  | -0.892322000 | -1.670810000 |
| 8                         | 0.761154000  | -1.622521000 | -2.661232000 | 8                         | 0.346054000  | -1.158739000 | -2.694858000 |
| 6                         | 2.799587000  | 0.624613000  | -0.871091000 | 6                         | 2.622606000  | 0.894728000  | -0.910270000 |
| 8                         | 3.618871000  | 1.189955000  | -1.446258000 | 8                         | 3.323790000  | 1.615821000  | -1.482819000 |
| 6                         | 0.299315000  | -1.610107000 | 0.959425000  | 6                         | 0.715528000  | -1.845149000 | 0.907472000  |
| 8                         | -0.373153000 | -2.358871000 | 1.507990000  | 8                         | 0.285406000  | -2.747133000 | 1.479579000  |
| 6                         | -0.055084000 | 1.061761000  | -0.111297000 | 6                         | -0.193884000 | 0.875370000  | 0.184475000  |
| 7                         | 0.052651000  | 2.389434000  | -0.098409000 | 7                         | -0.200651000 | 2.310543000  | 0.245672000  |
| 6                         | -1.003549000 | 3.355575000  | -0.463206000 | 6                         | -0.417788000 | 2.985650000  | -1.030792000 |
| 1                         | -1.434016000 | 3.821250000  | 0.427418000  | 1                         | -0.648343000 | 4.044193000  | -0.859496000 |
| 1                         | -0.548736000 | 4.140842000  | -1.070293000 | 1                         | 0.466847000  | 2.934091000  | -1.689455000 |
| 1                         | -1.791029000 | 2.874420000  | -1.033444000 | 1                         | -1.259041000 | 2.532857000  | -1.555416000 |
| 6                         | 1.304329000  | 3.091215000  | 0.207533000  | 6                         | 0.829836000  | 2.956181000  | 1.034527000  |
| 1                         | 1.990447000  | 2.442621000  | 0.733610000  | 1                         | 0.880612000  | 2.505667000  | 2.024997000  |
| 1                         | 1.773354000  | 3.450319000  | -0.712337000 | 1                         | 1.833753000  | 2.906938000  | 0.582560000  |
| 1                         | 1.076738000  | 3.952627000  | 0.839555000  | 1                         | 0.572044000  | 4.014605000  | 1.158573000  |
| 6                         | -1.437527000 | 0.580471000  | -0.206546000 | 6                         | -1.512483000 | 0.392160000  | 0.101559000  |
| 6                         | -2.593325000 | 0.932238000  | 0.449138000  | 6                         | -2.764903000 | 1.003624000  | 0.277578000  |
| 6                         | -3.575334000 | -0.041193000 | 0.106755000  | 6                         | -3.742049000 | -0.001888000 | 0.105570000  |

|                            |              |              |              |                           |              |              |              |
|----------------------------|--------------|--------------|--------------|---------------------------|--------------|--------------|--------------|
| 1                          | -2.736494000 | 1.758066000  | 1.128141000  | 1                         | -2.931010000 | 2.033238000  | 0.549641000  |
| 6                          | -2.969483000 | -0.918416000 | -0.752345000 | 6                         | -3.087216000 | -1.176533000 | -0.171156000 |
| 1                          | -3.294562000 | -1.789714000 | -1.293863000 | 1                         | -3.401892000 | -2.187057000 | -0.367453000 |
| 8                          | -1.668363000 | -0.556600000 | -0.930431000 | 8                         | -1.736245000 | -0.951679000 | -0.180191000 |
| 8                          | -4.836382000 | -0.013499000 | 0.589674000  | 8                         | -5.087292000 | 0.227052000  | 0.219958000  |
| 6                          | -5.678165000 | -1.086993000 | 0.180189000  | 6                         | -5.908613000 | -0.907716000 | 0.035681000  |
| 1                          | -5.816216000 | -1.081718000 | -0.906438000 | 1                         | -5.780968000 | -1.332099000 | -0.968345000 |
| 1                          | -5.259818000 | -2.049319000 | 0.493104000  | 1                         | -5.686678000 | -1.683756000 | 0.779076000  |
| 1                          | -6.636568000 | -0.927974000 | 0.669543000  | 1                         | -6.938900000 | -0.572616000 | 0.158270000  |
| E= -2128.10405832 Hartrees |              |              |              | E=-2128.15150285 Hartrees |              |              |              |
| <b>3c</b>                  |              |              |              | <b>3c'</b>                |              |              |              |
| 24                         | 1.075068000  | -0.221601000 | 0.036878000  | 24                        | 1.109870000  | -0.284138000 | -0.017910000 |
| 6                          | 1.521436000  | 0.634919000  | 1.681219000  | 6                         | 1.671685000  | 0.404868000  | 1.653497000  |
| 8                          | 1.810023000  | 1.120355000  | 2.682152000  | 8                         | 2.038889000  | 0.791133000  | 2.679393000  |
| 6                          | 2.697608000  | -1.170396000 | 0.119623000  | 6                         | 2.712875000  | -1.167324000 | -0.295110000 |
| 8                          | 3.692161000  | -1.746424000 | 0.172182000  | 8                         | 3.719125000  | -1.722950000 | -0.475555000 |
| 6                          | 0.668407000  | -1.128223000 | -1.606675000 | 6                         | 0.360943000  | -0.877334000 | -1.667221000 |
| 8                          | 0.496333000  | -1.679554000 | -2.595845000 | 8                         | -0.070068000 | -1.212882000 | -2.681380000 |
| 6                          | 1.988682000  | 1.086935000  | -1.005180000 | 6                         | 1.878654000  | 1.185488000  | -0.930932000 |
| 8                          | 2.598584000  | 1.818469000  | -1.648916000 | 8                         | 2.443519000  | 2.012826000  | -1.510787000 |
| 6                          | 0.274554000  | -1.641295000 | 1.046952000  | 6                         | 0.497367000  | -1.843165000 | 0.902249000  |
| 8                          | -0.141418000 | -2.516603000 | 1.658979000  | 8                         | 0.242546000  | -2.809257000 | 1.474778000  |
| 6                          | -0.834611000 | 0.802880000  | -0.064981000 | 6                         | -0.880003000 | 0.687531000  | 0.210251000  |
| 7                          | -1.073698000 | 2.113318000  | -0.099687000 | 7                         | -1.128165000 | 2.103684000  | 0.262669000  |
| 6                          | -2.364096000 | 2.757453000  | -0.418078000 | 6                         | -1.455143000 | 2.720243000  | -1.019509000 |
| 1                          | -2.845268000 | 3.140728000  | 0.485867000  | 1                         | -1.854424000 | 3.729206000  | -0.858216000 |
| 1                          | -2.166421000 | 3.602358000  | -1.080800000 | 1                         | -0.576119000 | 2.806403000  | -1.682064000 |
| 1                          | -3.032786000 | 2.062649000  | -0.915029000 | 1                         | -2.212899000 | 2.130600000  | -1.535742000 |
| 6                          | -0.031445000 | 3.126768000  | 0.099242000  | 6                         | -0.213379000 | 2.916765000  | 1.039156000  |
| 1                          | 0.830145000  | 2.699974000  | 0.592685000  | 1                         | -0.077451000 | 2.485070000  | 2.030098000  |
| 1                          | 0.271201000  | 3.554798000  | -0.860069000 | 1                         | 0.780323000  | 3.034955000  | 0.577196000  |
| 1                          | -0.436383000 | 3.926735000  | 0.723234000  | 1                         | -0.644012000 | 3.917571000  | 1.163193000  |
| 6                          | -2.049089000 | -0.018175000 | -0.044435000 | 6                         | -2.101064000 | -0.008363000 | 0.158214000  |
| 6                          | -3.214851000 | 0.047710000  | 0.684235000  | 6                         | -3.438696000 | 0.381034000  | 0.350594000  |
| 6                          | -3.930609000 | -1.161198000 | 0.449092000  | 6                         | -4.245473000 | -0.775182000 | 0.204949000  |
| 1                          | -3.510064000 | 0.850242000  | 1.342560000  | 1                         | -3.754460000 | 1.378992000  | 0.610427000  |
| 6                          | -3.168506000 | -1.880041000 | -0.420377000 | 6                         | -3.398289000 | -1.812229000 | -0.071089000 |
| 1                          | -4.880137000 | -1.455782000 | 0.869679000  | 1                         | -5.321229000 | -0.843536000 | 0.299358000  |
| 1                          | -3.293886000 | -2.833395000 | -0.907698000 | 1                         | -3.545899000 | -2.864763000 | -0.254172000 |
| 8                          | -2.026563000 | -1.217135000 | -0.713743000 | 8                         | -2.107813000 | -1.378242000 | -0.107603000 |
| E= -2013.55461300 Hartrees |              |              |              | E=-2013.60169949 Hartrees |              |              |              |
| <b>3d</b>                  |              |              |              | <b>3d'</b>                |              |              |              |
| 24                         | 1.465795000  | -0.424813000 | 0.066918000  | 24                        | 1.573275000  | -0.403833000 | -0.005548000 |
| 6                          | 1.960147000  | 0.211241000  | 1.795770000  | 6                         | 2.216678000  | 0.215431000  | 1.664372000  |
| 8                          | 2.269723000  | 0.558388000  | 2.846659000  | 8                         | 2.632340000  | 0.554451000  | 2.688173000  |
| 6                          | 2.782775000  | -1.760393000 | 0.212861000  | 6                         | 3.034180000  | -1.515729000 | -0.247906000 |
| 8                          | 3.590585000  | -2.574445000 | 0.305089000  | 8                         | 3.949871000  | -2.215155000 | -0.406518000 |
| 6                          | 1.001253000  | -1.123068000 | -1.660664000 | 6                         | 0.779192000  | -0.911535000 | -1.662738000 |
| 8                          | 0.791332000  | -1.568538000 | -2.694894000 | 8                         | 0.327574000  | -1.199962000 | -2.682166000 |

|                           |              |              |              |                            |              |              |              |
|---------------------------|--------------|--------------|--------------|----------------------------|--------------|--------------|--------------|
| 6                         | 2.772070000  | 0.653157000  | -0.807866000 | 6                          | 2.555475000  | 0.930652000  | -0.922528000 |
| 8                         | 3.603888000  | 1.233279000  | -1.349168000 | 8                          | 3.237089000  | 1.664655000  | -1.501811000 |
| 6                         | 0.244975000  | -1.636739000 | 0.913722000  | 6                          | 0.722951000  | -1.839797000 | 0.925412000  |
| 8                         | -0.431611000 | -2.403656000 | 1.431315000  | 8                          | 0.314898000  | -2.745635000 | 1.507309000  |
| 6                         | -0.108033000 | 1.056440000  | -0.118303000 | 6                          | -0.255862000 | 0.847059000  | 0.179090000  |
| 7                         | -0.007080000 | 2.384914000  | -0.081010000 | 7                          | -0.299536000 | 2.283596000  | 0.229912000  |
| 6                         | -1.058050000 | 3.351338000  | -0.458103000 | 6                          | -0.523215000 | 2.940922000  | -1.054739000 |
| 1                         | -1.515733000 | 3.799767000  | 0.427950000  | 1                          | -0.778282000 | 3.995697000  | -0.895437000 |
| 1                         | -0.591775000 | 4.149588000  | -1.038998000 | 1                          | 0.366099000  | 2.902774000  | -1.707743000 |
| 1                         | -1.826346000 | 2.875511000  | -1.058521000 | 1                          | -1.350761000 | 2.464346000  | -1.580333000 |
| 6                         | 1.231680000  | 3.088106000  | 0.270620000  | 6                          | 0.713700000  | 2.958766000  | 1.016847000  |
| 1                         | 1.908294000  | 2.433660000  | 0.801603000  | 1                          | 0.770733000  | 2.518156000  | 2.011469000  |
| 1                         | 1.721981000  | 3.468230000  | -0.629547000 | 1                          | 1.720066000  | 2.927525000  | 0.568923000  |
| 1                         | 0.982458000  | 3.935591000  | 0.913299000  | 1                          | 0.432289000  | 4.012274000  | 1.130544000  |
| 6                         | -1.484563000 | 0.572721000  | -0.255707000 | 6                          | -1.563155000 | 0.336175000  | 0.105501000  |
| 6                         | -2.665570000 | 0.902920000  | 0.364383000  | 6                          | -2.832011000 | 0.907933000  | 0.281384000  |
| 6                         | -3.643744000 | -0.079012000 | 0.005452000  | 6                          | -3.808921000 | -0.114938000 | 0.118299000  |
| 1                         | -2.819489000 | 1.727542000  | 1.044302000  | 1                          | -3.010665000 | 1.940012000  | 0.541441000  |
| 6                         | -2.986293000 | -0.928270000 | -0.846222000 | 6                          | -3.100715000 | -1.265267000 | -0.151239000 |
| 1                         | -3.300246000 | -1.782303000 | -1.424369000 | 1                          | -3.391299000 | -2.288306000 | -0.329027000 |
| 8                         | -1.694488000 | -0.567096000 | -0.994021000 | 8                          | -1.766407000 | -1.020390000 | -0.166640000 |
| 6                         | -5.033426000 | -0.124541000 | 0.459004000  | 6                          | -5.251542000 | 0.064530000  | 0.235544000  |
| 1                         | -5.423431000 | 0.810373000  | 0.856625000  | 1                          | -5.557422000 | 1.061521000  | 0.551819000  |
| 6                         | -5.836035000 | -1.191934000 | 0.433403000  | 6                          | -6.214611000 | -0.836888000 | 0.000045000  |
| 1                         | -5.501473000 | -2.163201000 | 0.082206000  | 1                          | -5.996075000 | -1.849135000 | -0.327575000 |
| 1                         | -6.862334000 | -1.128875000 | 0.776538000  | 1                          | -7.262331000 | -0.585639000 | 0.128870000  |
| E=-2090.97032506 Hartrees |              |              |              | E= -2091.01991085 Hartrees |              |              |              |
| <b>3e</b>                 |              |              |              | <b>3e'</b>                 |              |              |              |
| 24                        | 1.528210000  | -0.378710000 | 0.073496000  | 24                         | 1.631814000  | -0.360790000 | 0.000743000  |
| 6                         | 1.965188000  | 0.301148000  | 1.801394000  | 6                          | 2.250156000  | 0.285554000  | 1.670629000  |
| 8                         | 2.240239000  | 0.676263000  | 2.852044000  | 8                          | 2.658108000  | 0.638847000  | 2.692661000  |
| 6                         | 2.909823000  | -1.645012000 | 0.254335000  | 6                          | 3.146647000  | -1.401973000 | -0.227775000 |
| 8                         | 3.756119000  | -2.415479000 | 0.368037000  | 8                          | 4.095688000  | -2.057357000 | -0.376260000 |
| 6                         | 1.127989000  | -1.120923000 | -1.652872000 | 6                          | 0.888976000  | -0.921123000 | -1.664134000 |
| 8                         | 0.958813000  | -1.590208000 | -2.683728000 | 8                          | 0.474158000  | -1.243051000 | -2.688863000 |
| 6                         | 2.789577000  | 0.757168000  | -0.796487000 | 6                          | 2.544282000  | 1.024501000  | -0.914570000 |
| 8                         | 3.595634000  | 1.375506000  | -1.333589000 | 8                          | 3.182574000  | 1.796680000  | -1.492854000 |
| 6                         | 0.355337000  | -1.639565000 | 0.914300000  | 6                          | 0.835672000  | -1.826306000 | 0.933478000  |
| 8                         | -0.296290000 | -2.429934000 | 1.429128000  | 8                          | 0.455336000  | -2.741369000 | 1.519447000  |
| 6                         | -0.112049000 | 1.016635000  | -0.142962000 | 6                          | -0.255753000 | 0.801854000  | 0.166366000  |
| 7                         | -0.090268000 | 2.347269000  | -0.111725000 | 7                          | -0.369075000 | 2.231422000  | 0.231778000  |
| 6                         | -1.198277000 | 3.248858000  | -0.489581000 | 6                          | -0.644879000 | 2.896951000  | -1.039163000 |
| 1                         | -1.675184000 | 3.675247000  | 0.396942000  | 1                          | -0.966962000 | 3.929531000  | -0.858408000 |
| 1                         | -0.781787000 | 4.068371000  | -1.078351000 | 1                          | 0.241336000  | 2.929289000  | -1.696560000 |
| 1                         | -1.941581000 | 2.725769000  | -1.081649000 | 1                          | -1.442832000 | 2.378124000  | -1.569837000 |
| 6                         | 1.105070000  | 3.123667000  | 0.237497000  | 6                          | 0.611322000  | 2.951761000  | 1.020010000  |
| 1                         | 1.822082000  | 2.509835000  | 0.763995000  | 1                          | 0.700837000  | 2.503091000  | 2.008379000  |
| 1                         | 1.567163000  | 3.534005000  | -0.664218000 | 1                          | 1.613467000  | 2.982314000  | 0.563179000  |
| 1                         | 0.807247000  | 3.953264000  | 0.882636000  | 1                          | 0.272380000  | 3.986256000  | 1.149215000  |
| 6                         | -1.460719000 | 0.453462000  | -0.285627000 | 6                          | -1.536865000 | 0.228831000  | 0.068478000  |

|                           |              |              |              |                           |              |              |              |
|---------------------------|--------------|--------------|--------------|---------------------------|--------------|--------------|--------------|
| 6                         | -2.648123000 | 0.695209000  | 0.359357000  | 6                         | -2.833796000 | 0.741547000  | 0.233424000  |
| 6                         | -3.560062000 | -0.333142000 | -0.035036000 | 6                         | -3.738030000 | -0.338110000 | 0.054861000  |
| 1                         | -2.854833000 | 1.489064000  | 1.060359000  | 1                         | -3.074610000 | 1.759996000  | 0.491535000  |
| 6                         | -2.875120000 | -1.116213000 | -0.917594000 | 6                         | -2.986492000 | -1.447731000 | -0.220913000 |
| 1                         | -3.150700000 | -1.980820000 | -1.499438000 | 1                         | -3.242605000 | -2.475698000 | -0.419920000 |
| 8                         | -1.609662000 | -0.669842000 | -1.066035000 | 8                         | -1.666519000 | -1.133244000 | -0.226513000 |
| 16                        | -5.270041000 | -0.515889000 | 0.412707000  | 16                        | -5.517867000 | -0.306905000 | 0.085625000  |
| 1                         | -5.067551000 | -1.080546000 | 1.627378000  | 1                         | -5.677346000 | -0.101990000 | 1.417053000  |
| E=-2411.76501728 Hartrees |              |              |              | E=-2411.81778480 Hartrees |              |              |              |
| <b>3f</b>                 |              |              |              | <b>3f</b>                 |              |              |              |
| 24                        | 2.014358000  | -0.407225000 | 0.087163000  | 24                        | 2.152123000  | -0.375058000 | 0.007462000  |
| 6                         | 2.420404000  | 0.230372000  | 1.839372000  | 6                         | 2.760760000  | 0.263786000  | 1.684106000  |
| 8                         | 2.676183000  | 0.579643000  | 2.903457000  | 8                         | 3.161948000  | 0.611733000  | 2.710316000  |
| 6                         | 3.346467000  | -1.723338000 | 0.289690000  | 6                         | 3.653835000  | -1.439827000 | -0.201617000 |
| 8                         | 4.162377000  | -2.523688000 | 0.416157000  | 8                         | 4.594741000  | -2.108868000 | -0.338557000 |
| 6                         | 1.643934000  | -1.109379000 | -1.662097000 | 6                         | 1.422306000  | -0.930029000 | -1.665151000 |
| 8                         | 1.490299000  | -1.556826000 | -2.705052000 | 8                         | 1.016546000  | -1.250013000 | -2.693995000 |
| 6                         | 3.342273000  | 0.696329000  | -0.722446000 | 6                         | 3.096985000  | 0.992545000  | -0.900987000 |
| 8                         | 4.187449000  | 1.293141000  | -1.222521000 | 8                         | 3.753185000  | 1.753019000  | -1.474440000 |
| 6                         | 0.774681000  | -1.643078000 | 0.870680000  | 6                         | 1.322348000  | -1.828256000 | 0.931139000  |
| 8                         | 0.084522000  | -2.422131000 | 1.350268000  | 8                         | 0.921698000  | -2.738583000 | 1.510493000  |
| 6                         | 0.434252000  | 1.047244000  | -0.162809000 | 6                         | 0.286290000  | 0.823676000  | 0.150998000  |
| 7                         | 0.503154000  | 2.376089000  | -0.117878000 | 7                         | 0.197178000  | 2.254440000  | 0.218495000  |
| 6                         | -0.553760000 | 3.321767000  | -0.532856000 | 6                         | -0.053668000 | 2.926874000  | -1.054074000 |
| 1                         | -1.046776000 | 3.763879000  | 0.336984000  | 1                         | -0.356170000 | 3.965468000  | -0.874813000 |
| 1                         | -0.083520000 | 4.126245000  | -1.101618000 | 1                         | 0.839054000  | 2.941368000  | -1.702987000 |
| 1                         | -1.293879000 | 2.830835000  | -1.155755000 | 1                         | -0.856908000 | 2.424955000  | -1.592999000 |
| 6                         | 1.712140000  | 3.104099000  | 0.285155000  | 6                         | 1.181140000  | 2.956660000  | 1.019236000  |
| 1                         | 2.378932000  | 2.462484000  | 0.843803000  | 1                         | 1.252583000  | 2.504170000  | 2.007247000  |
| 1                         | 2.231118000  | 3.494420000  | -0.594151000 | 1                         | 2.188453000  | 2.972421000  | 0.573361000  |
| 1                         | 1.418682000  | 3.945670000  | 0.916529000  | 1                         | 0.857356000  | 3.995971000  | 1.147663000  |
| 6                         | -0.928843000 | 0.535747000  | -0.358032000 | 6                         | -1.000901000 | 0.270399000  | 0.038662000  |
| 6                         | -2.127876000 | 0.825690000  | 0.248258000  | 6                         | -2.290411000 | 0.810508000  | 0.199552000  |
| 6                         | -3.055869000 | -0.157264000 | -0.198370000 | 6                         | -3.193250000 | -0.253965000 | -0.002213000 |
| 1                         | -2.325754000 | 1.617547000  | 0.953122000  | 1                         | -2.515433000 | 1.825803000  | 0.479857000  |
| 6                         | -2.383112000 | -0.973379000 | -1.055313000 | 6                         | -2.478544000 | -1.383801000 | -0.277049000 |
| 1                         | -2.669786000 | -1.825660000 | -1.648234000 | 1                         | -2.752095000 | -2.403479000 | -0.488579000 |
| 8                         | -1.092608000 | -0.575037000 | -1.147216000 | 8                         | -1.149521000 | -1.086694000 | -0.259657000 |
| 35                        | -4.865418000 | -0.301837000 | 0.296413000  | 35                        | -5.094804000 | -0.162929000 | 0.102109000  |
| E=-4587.09724435 Hartrees |              |              |              | E=-4587.14970941 Hartrees |              |              |              |
| <b>3g</b>                 |              |              |              | <b>3g</b>                 |              |              |              |
| 24                        | 1.978356000  | -0.463740000 | 0.098744000  | 24                        | 2.109096000  | -0.439038000 | 0.010360000  |
| 6                         | 2.466192000  | 0.227674000  | 1.809761000  | 6                         | 2.780835000  | 0.194917000  | 1.664984000  |
| 8                         | 2.772332000  | 0.605323000  | 2.850531000  | 8                         | 3.217977000  | 0.536729000  | 2.678430000  |
| 6                         | 3.237309000  | -1.843248000 | 0.336553000  | 6                         | 3.537979000  | -1.599902000 | -0.194274000 |
| 8                         | 4.008917000  | -2.683252000 | 0.483984000  | 8                         | 4.432634000  | -2.330132000 | -0.329446000 |
| 6                         | 1.530373000  | -1.228890000 | -1.604418000 | 6                         | 1.323076000  | -0.982747000 | -1.639124000 |
| 8                         | 1.330188000  | -1.719486000 | -2.619977000 | 8                         | 0.881881000  | -1.299942000 | -2.654511000 |
| 6                         | 3.344180000  | 0.522682000  | -0.794912000 | 6                         | 3.121553000  | 0.848996000  | -0.942078000 |

|   |              |              |              |   |              |              |              |
|---|--------------|--------------|--------------|---|--------------|--------------|--------------|
| 8 | 4.206737000  | 1.046656000  | -1.344412000 | 8 | 3.811792000  | 1.555913000  | -1.543033000 |
| 6 | 0.687473000  | -1.582177000 | 0.968658000  | 6 | 1.200961000  | -1.814191000 | 0.975608000  |
| 8 | -0.038493000 | -2.292603000 | 1.499882000  | 8 | 0.745629000  | -2.682895000 | 1.578755000  |
| 6 | 0.476537000  | 1.069349000  | -0.188356000 | 6 | 0.322882000  | 0.878863000  | 0.148240000  |
| 7 | 0.623010000  | 2.392158000  | -0.199480000 | 7 | 0.327003000  | 2.311327000  | 0.188621000  |
| 6 | -0.388255000 | 3.382130000  | -0.625475000 | 6 | 0.078597000  | 2.982579000  | -1.084968000 |
| 1 | -0.843618000 | 3.872559000  | 0.238731000  | 1 | -0.166020000 | 4.037052000  | -0.910889000 |
| 1 | 0.115489000  | 4.144328000  | -1.222838000 | 1 | 0.954984000  | 2.943746000  | -1.755004000 |
| 1 | -1.163441000 | 2.915085000  | -1.223681000 | 1 | -0.762694000 | 2.517565000  | -1.597821000 |
| 6 | 1.880557000  | 3.063329000  | 0.150438000  | 6 | 1.365931000  | 2.968291000  | 0.956872000  |
| 1 | 2.519140000  | 2.408121000  | 0.725888000  | 1 | 1.432088000  | 2.528995000  | 1.951080000  |
| 1 | 2.404121000  | 3.382765000  | -0.754342000 | 1 | 2.362903000  | 2.918929000  | 0.490395000  |
| 1 | 1.649799000  | 3.947622000  | 0.748391000  | 1 | 1.105006000  | 4.026411000  | 1.073556000  |
| 6 | -0.916844000 | 0.631662000  | -0.341810000 | 6 | -1.002026000 | 0.411458000  | 0.057618000  |
| 6 | -2.091092000 | 1.014932000  | 0.251241000  | 6 | -2.255093000 | 1.015490000  | 0.214226000  |
| 6 | -3.086466000 | 0.063536000  | -0.128508000 | 6 | -3.242308000 | 0.002379000  | 0.042051000  |
| 1 | -2.247118000 | 1.852265000  | 0.912661000  | 1 | -2.428503000 | 2.047026000  | 0.470976000  |
| 6 | -2.453897000 | -0.832096000 | -0.945693000 | 6 | -2.564053000 | -1.165186000 | -0.214503000 |
| 1 | -2.792821000 | -1.699207000 | -1.488082000 | 1 | -2.891465000 | -2.173967000 | -0.404118000 |
| 8 | -1.153931000 | -0.517282000 | -1.071358000 | 8 | -1.236359000 | -0.949822000 | -0.214740000 |
| 6 | -4.496780000 | 0.085559000  | 0.289894000  | 6 | -4.688667000 | 0.171775000  | 0.131359000  |
| 8 | -4.979624000 | 0.930172000  | 1.008407000  | 8 | -5.273739000 | 1.210376000  | 0.358425000  |
| 8 | -5.190395000 | -0.949762000 | -0.228164000 | 8 | -5.361513000 | -1.003105000 | -0.075060000 |
| 6 | -6.582815000 | -1.017606000 | 0.128564000  | 6 | -6.784747000 | -0.919995000 | -0.002236000 |
| 1 | -6.694251000 | -1.108436000 | 1.209191000  | 1 | -7.106550000 | -0.577034000 | 0.983241000  |
| 1 | -7.107825000 | -0.125809000 | -0.214636000 | 1 | -7.175713000 | -0.234106000 | -0.756668000 |
| 1 | -6.965771000 | -1.903766000 | -0.371554000 | 1 | -7.147318000 | -1.930303000 | -0.186940000 |

E=-2241.49995055 Hartrees

### 3h

|    |              |              |              |
|----|--------------|--------------|--------------|
| 24 | 1.524924000  | -0.371127000 | 0.073832000  |
| 6  | 1.960611000  | 0.312374000  | 1.801582000  |
| 8  | 2.235669000  | 0.690736000  | 2.850797000  |
| 6  | 2.921383000  | -1.623027000 | 0.247998000  |
| 8  | 3.776432000  | -2.384149000 | 0.356950000  |
| 6  | 1.126193000  | -1.114983000 | -1.651716000 |
| 8  | 0.956165000  | -1.583441000 | -2.682869000 |
| 6  | 2.773284000  | 0.776919000  | -0.797901000 |
| 8  | 3.573374000  | 1.401804000  | -1.336436000 |
| 6  | 0.370617000  | -1.649902000 | 0.916337000  |
| 8  | -0.266203000 | -2.452543000 | 1.429658000  |
| 6  | -0.127866000 | 1.006765000  | -0.139771000 |
| 7  | -0.116896000 | 2.338097000  | -0.118141000 |
| 6  | -1.228646000 | 3.229383000  | -0.509353000 |
| 1  | -1.710966000 | 3.663180000  | 0.370671000  |
| 1  | -0.814440000 | 4.044686000  | -1.105507000 |
| 1  | -1.966871000 | 2.696625000  | -1.099125000 |
| 6  | 1.072000000  | 3.125518000  | 0.229006000  |
| 1  | 1.788510000  | 2.522386000  | 0.768509000  |
| 1  | 1.538318000  | 3.527071000  | -0.674418000 |
| 1  | 0.764658000  | 3.961359000  | 0.861432000  |

E= -2241.55372594 Hartrees

### 3h'

|    |              |              |              |
|----|--------------|--------------|--------------|
| 24 | 1.624486000  | -0.357994000 | 0.001074000  |
| 6  | 2.238115000  | 0.297250000  | 1.669440000  |
| 8  | 2.642941000  | 0.655854000  | 2.690616000  |
| 6  | 3.144895000  | -1.392489000 | -0.223258000 |
| 8  | 4.097686000  | -2.042558000 | -0.369778000 |
| 6  | 0.885800000  | -0.930253000 | -1.661724000 |
| 8  | 0.473680000  | -1.259769000 | -2.685066000 |
| 6  | 2.531345000  | 1.026463000  | -0.920282000 |
| 8  | 3.166152000  | 1.798537000  | -1.502418000 |
| 6  | 0.835450000  | -1.825999000 | 0.936984000  |
| 8  | 0.460614000  | -2.743193000 | 1.522821000  |
| 6  | -0.264737000 | 0.801289000  | 0.163984000  |
| 7  | -0.383191000 | 2.230480000  | 0.228495000  |
| 6  | -0.657942000 | 2.892950000  | -1.044335000 |
| 1  | -0.977959000 | 3.926515000  | -0.866188000 |
| 1  | 0.228196000  | 2.921312000  | -1.701787000 |
| 1  | -1.456853000 | 2.374072000  | -1.573611000 |
| 6  | 0.594294000  | 2.954514000  | 1.017620000  |
| 1  | 0.683042000  | 2.507424000  | 2.006743000  |
| 1  | 1.597204000  | 2.987235000  | 0.562782000  |
| 1  | 0.252148000  | 3.988098000  | 1.144815000  |

|                            |              |              |              |                            |              |              |              |
|----------------------------|--------------|--------------|--------------|----------------------------|--------------|--------------|--------------|
| 6                          | -1.472607000 | 0.432190000  | -0.276639000 | 6                          | -1.541307000 | 0.221459000  | 0.067842000  |
| 6                          | -2.663287000 | 0.683678000  | 0.362726000  | 6                          | -2.839734000 | 0.736062000  | 0.239363000  |
| 6                          | -3.558460000 | -0.348422000 | -0.033380000 | 6                          | -3.722880000 | -0.346449000 | 0.051792000  |
| 1                          | -2.876081000 | 1.480345000  | 1.057729000  | 1                          | -3.084460000 | 1.747622000  | 0.517086000  |
| 6                          | -2.880543000 | -1.154277000 | -0.895964000 | 6                          | -2.988630000 | -1.463303000 | -0.225680000 |
| 1                          | -3.150404000 | -2.031134000 | -1.460137000 | 1                          | -3.245522000 | -2.488993000 | -0.429139000 |
| 8                          | -1.613044000 | -0.701680000 | -1.036935000 | 8                          | -1.665565000 | -1.139177000 | -0.223292000 |
| 17                         | -5.200461000 | -0.538073000 | 0.480529000  | 17                         | -5.470189000 | -0.292430000 | 0.165913000  |
| E=-2473.17308352 Hartrees  |              |              |              | E= -2473.22867914 Hartrees |              |              |              |
| <b>3i</b>                  |              |              |              | <b>3i'</b>                 |              |              |              |
| 24                         | 2.118205000  | -0.469063000 | 0.114340000  | 24                         | 2.359145000  | -0.361217000 | 0.078018000  |
| 6                          | 2.338741000  | -0.022525000 | 1.957471000  | 6                          | 2.743121000  | 0.253699000  | 1.829248000  |
| 8                          | 2.481242000  | 0.209015000  | 3.073364000  | 8                          | 3.008568000  | 0.586906000  | 2.903067000  |
| 6                          | 3.323984000  | -1.897577000 | 0.352159000  | 6                          | 3.898562000  | -1.392451000 | 0.039780000  |
| 8                          | 4.062345000  | -2.766249000 | 0.500051000  | 8                          | 4.863354000  | -2.040043000 | 0.009742000  |
| 6                          | 1.938927000  | -0.990737000 | -1.725547000 | 6                          | 1.859633000  | -0.899501000 | -1.681940000 |
| 8                          | 1.897928000  | -1.336628000 | -2.816566000 | 8                          | 1.594671000  | -1.209509000 | -2.758686000 |
| 6                          | 3.607661000  | 0.597256000  | -0.416144000 | 6                          | 3.378092000  | 1.043763000  | -0.681578000 |
| 8                          | 4.545290000  | 1.171497000  | -0.749780000 | 8                          | 4.081689000  | 1.829490000  | -1.155929000 |
| 6                          | 0.705894000  | -1.665608000 | 0.616330000  | 6                          | 1.450805000  | -1.848188000 | 0.863770000  |
| 8                          | -0.094358000 | -2.423750000 | 0.928971000  | 8                          | 0.997913000  | -2.777244000 | 1.370043000  |
| 6                          | 0.686711000  | 1.118659000  | -0.189909000 | 6                          | 0.467016000  | 0.798201000  | 0.007508000  |
| 7                          | 0.834393000  | 2.428963000  | -0.006531000 | 7                          | 0.339415000  | 2.224731000  | 0.091307000  |
| 6                          | -0.091968000 | 3.487101000  | -0.460607000 | 6                          | 0.234651000  | 2.922313000  | -1.188352000 |
| 1                          | -0.672506000 | 3.884594000  | 0.376090000  | 1                          | -0.113797000 | 3.949222000  | -1.026629000 |
| 1                          | 0.503670000  | 4.301447000  | -0.877220000 | 1                          | 1.201608000  | 2.972149000  | -1.717933000 |
| 1                          | -0.766985000 | 3.114435000  | -1.223626000 | 1                          | -0.480965000 | 2.416413000  | -1.836045000 |
| 6                          | 2.022407000  | 3.022544000  | 0.618956000  | 6                          | 1.198946000  | 2.927834000  | 1.024048000  |
| 1                          | 2.557488000  | 2.286920000  | 1.202728000  | 1                          | 1.154712000  | 2.454905000  | 2.003963000  |
| 1                          | 2.685658000  | 3.437889000  | -0.144055000 | 1                          | 2.253698000  | 2.973042000  | 0.709501000  |
| 1                          | 1.701305000  | 3.832096000  | 1.277907000  | 1                          | 0.838444000  | 3.957341000  | 1.130873000  |
| 6                          | -0.669361000 | 0.734965000  | -0.608467000 | 6                          | -0.783819000 | 0.225552000  | -0.280309000 |
| 6                          | -1.917297000 | 1.064417000  | -0.138169000 | 6                          | -2.092956000 | 0.741781000  | -0.283610000 |
| 6                          | -2.828657000 | 0.199350000  | -0.803949000 | 6                          | -2.933934000 | -0.338961000 | -0.613382000 |
| 1                          | -2.160357000 | 1.801232000  | 0.610344000  | 1                          | -2.371366000 | 1.748708000  | -0.023186000 |
| 6                          | -2.106709000 | -0.584898000 | -1.648334000 | 6                          | -2.171645000 | -1.452132000 | -0.810927000 |
| 1                          | -2.370784000 | -1.344245000 | -2.365170000 | 1                          | -2.399229000 | -2.467940000 | -1.086343000 |
| 8                          | -0.796705000 | -0.278761000 | -1.526345000 | 8                          | -0.865084000 | -1.128428000 | -0.619532000 |
| 8                          | -4.212013000 | 0.210378000  | -0.714768000 | 8                          | -4.326866000 | -0.315002000 | -0.813810000 |
| 6                          | -4.776057000 | -0.328349000 | 0.397532000  | 6                          | -5.116893000 | -0.128920000 | 0.249531000  |
| 9                          | -6.095442000 | -0.208960000 | 0.275527000  | 9                          | -6.394128000 | -0.217118000 | -0.165103000 |
| 9                          | -4.471038000 | -1.626828000 | 0.552469000  | 9                          | -4.939451000 | -1.045669000 | 1.225042000  |
| 9                          | -4.392481000 | 0.307875000  | 1.525028000  | 9                          | -4.966633000 | 1.085559000  | 0.830318000  |
| E= -2425.93726075 Hartrees |              |              |              | E= -2425.99631560 Hartrees |              |              |              |
| <b>3j</b>                  |              |              |              | <b>3j'</b>                 |              |              |              |
| 24                         | 1.959618000  | -0.408122000 | 0.082807000  | 24                         | 2.102609000  | -0.376646000 | 0.007409000  |
| 6                          | 2.363098000  | 0.229731000  | 1.836755000  | 6                          | 2.735942000  | 0.275297000  | 1.670723000  |
| 8                          | 2.615919000  | 0.581541000  | 2.900247000  | 8                          | 3.156086000  | 0.628751000  | 2.687135000  |
| 6                          | 3.282563000  | -1.735134000 | 0.291804000  | 6                          | 3.601414000  | -1.447327000 | -0.200265000 |



|                            |              |              |              |                            |              |              |              |
|----------------------------|--------------|--------------|--------------|----------------------------|--------------|--------------|--------------|
| 8                          | 4.091509000  | -2.541135000 | 0.422297000  | 8                          | 4.539533000  | -2.119793000 | -0.336165000 |
| 6                          | 1.593129000  | -1.106970000 | -1.668382000 | 6                          | 1.370149000  | -0.956546000 | -1.655353000 |
| 8                          | 1.439467000  | -1.551993000 | -2.712274000 | 8                          | 0.964645000  | -1.294302000 | -2.678551000 |
| 6                          | 3.301087000  | 0.685497000  | -0.720190000 | 6                          | 3.035196000  | 0.984422000  | -0.924580000 |
| 8                          | 4.153518000  | 1.275001000  | -1.215796000 | 8                          | 3.679170000  | 1.743329000  | -1.512923000 |
| 6                          | 0.708718000  | -1.636869000 | 0.858576000  | 6                          | 1.268673000  | -1.811467000 | 0.954366000  |
| 8                          | 0.008661000  | -2.411650000 | 1.330666000  | 8                          | 0.857254000  | -2.708261000 | 1.547021000  |
| 6                          | 0.394398000  | 1.053232000  | -0.170079000 | 6                          | 0.241099000  | 0.825798000  | 0.147082000  |
| 7                          | 0.462803000  | 2.380825000  | -0.127747000 | 7                          | 0.153222000  | 2.254556000  | 0.217203000  |
| 6                          | -0.598854000 | 3.326247000  | -0.533301000 | 6                          | -0.130266000 | 2.934950000  | -1.044772000 |
| 1                          | -1.078556000 | 3.772275000  | 0.341771000  | 1                          | -0.442600000 | 3.967878000  | -0.851185000 |
| 1                          | -0.135277000 | 4.127255000  | -1.112094000 | 1                          | 0.751008000  | 2.966221000  | -1.708299000 |
| 1                          | -1.348435000 | 2.834202000  | -1.143690000 | 1                          | -0.936194000 | 2.427947000  | -1.574414000 |
| 6                          | 1.676039000  | 3.108408000  | 0.264696000  | 6                          | 1.147321000  | 2.960036000  | 1.002614000  |
| 1                          | 2.342375000  | 2.469089000  | 0.826741000  | 1                          | 1.240257000  | 2.504370000  | 1.987126000  |
| 1                          | 2.192710000  | 3.488498000  | -0.620287000 | 1                          | 2.145461000  | 2.984872000  | 0.537330000  |
| 1                          | 1.387547000  | 3.956557000  | 0.889159000  | 1                          | 0.818721000  | 3.996375000  | 1.141289000  |
| 6                          | -0.973700000 | 0.544215000  | -0.358564000 | 6                          | -1.050820000 | 0.277377000  | 0.036275000  |
| 6                          | -2.157771000 | 0.806434000  | 0.279821000  | 6                          | -2.337833000 | 0.808564000  | 0.204717000  |
| 6                          | -3.096604000 | -0.165318000 | -0.182500000 | 6                          | -3.256261000 | -0.256680000 | 0.003707000  |
| 1                          | -2.338493000 | 1.574956000  | 1.015194000  | 1                          | -2.559736000 | 1.823518000  | 0.490668000  |
| 6                          | -2.432798000 | -0.943609000 | -1.080813000 | 6                          | -2.522929000 | -1.376013000 | -0.278712000 |
| 1                          | -2.728326000 | -1.776603000 | -1.696854000 | 1                          | -2.792926000 | -2.396254000 | -0.494193000 |
| 8                          | -1.151931000 | -0.539624000 | -1.186331000 | 8                          | -1.204284000 | -1.082038000 | -0.268614000 |
| 6                          | -4.519770000 | -0.296915000 | 0.225159000  | 6                          | -4.728750000 | -0.193730000 | 0.089226000  |
| 9                          | -5.227977000 | 0.827727000  | -0.049483000 | 9                          | -5.277826000 | 0.682281000  | -0.801394000 |
| 9                          | -5.128555000 | -1.319063000 | -0.411876000 | 9                          | -5.316634000 | -1.395903000 | -0.150223000 |
| 9                          | -4.649951000 | -0.511761000 | 1.554531000  | 9                          | -5.176208000 | 0.212857000  | 1.311621000  |
| E= -2350.70395189 Hartrees |              |              |              | E= -2350.76411335 Hartrees |              |              |              |

|           |              |              |              |            |              |              |              |
|-----------|--------------|--------------|--------------|------------|--------------|--------------|--------------|
| <b>3k</b> |              |              |              | <b>3k'</b> |              |              |              |
| 24        | 1.416544000  | -0.366529000 | 0.077335000  | 24         | 1.512631000  | -0.351485000 | 0.003129000  |
| 6         | 1.846854000  | 0.321307000  | 1.806192000  | 6          | 2.149610000  | 0.327504000  | 1.654471000  |
| 8         | 2.117730000  | 0.703205000  | 2.854683000  | 8          | 2.573585000  | 0.697597000  | 2.663245000  |
| 6         | 2.822247000  | -1.610790000 | 0.254448000  | 6          | 3.041208000  | -1.376984000 | -0.218150000 |
| 8         | 3.681280000  | -2.366217000 | 0.365129000  | 8          | 3.997563000  | -2.021166000 | -0.362260000 |
| 6         | 1.027543000  | -1.114672000 | -1.648439000 | 6          | 0.779544000  | -0.966607000 | -1.646805000 |
| 8         | 0.861336000  | -1.585427000 | -2.679036000 | 8          | 0.373992000  | -1.325377000 | -2.662732000 |
| 6         | 2.660190000  | 0.789784000  | -0.793002000 | 6          | 2.389358000  | 1.032552000  | -0.949435000 |
| 8         | 3.456480000  | 1.419465000  | -1.330621000 | 8          | 3.000047000  | 1.808193000  | -1.551074000 |
| 6         | 0.269080000  | -1.653140000 | 0.915566000  | 6          | 0.734405000  | -1.804872000 | 0.969164000  |
| 8         | -0.367693000 | -2.459369000 | 1.423415000  | 8          | 0.357323000  | -2.709640000 | 1.572348000  |
| 6         | -0.239475000 | 0.998526000  | -0.137497000 | 6          | -0.381019000 | 0.795554000  | 0.160101000  |
| 7         | -0.244444000 | 2.328846000  | -0.118210000 | 7          | -0.511770000 | 2.220990000  | 0.227405000  |
| 6         | -1.369219000 | 3.207138000  | -0.503448000 | 6          | -0.834671000 | 2.888902000  | -1.031951000 |
| 1         | -1.847076000 | 3.639468000  | 0.379568000  | 1          | -1.177346000 | 3.911651000  | -0.835969000 |
| 1         | -0.968762000 | 4.023788000  | -1.106871000 | 1          | 0.035939000  | 2.946994000  | -1.707488000 |
| 1         | -2.107505000 | 2.665166000  | -1.084530000 | 1          | -1.630900000 | 2.355061000  | -1.549709000 |
| 6         | 0.938075000  | 3.129703000  | 0.221779000  | 6          | 0.471786000  | 2.959543000  | 0.995859000  |
| 1         | 1.660791000  | 2.536382000  | 0.764075000  | 1          | 0.593314000  | 2.510589000  | 1.980283000  |
| 1         | 1.398737000  | 3.529162000  | -0.685316000 | 1          | 1.461457000  | 3.013381000  | 0.515438000  |

|                            |              |              |              |                            |              |              |              |
|----------------------------|--------------|--------------|--------------|----------------------------|--------------|--------------|--------------|
| 1                          | 0.623665000  | 3.966690000  | 0.848888000  | 1                          | 0.113324000  | 3.985648000  | 1.136159000  |
| 6                          | -1.581915000 | 0.410188000  | -0.267583000 | 6                          | -1.655448000 | 0.207100000  | 0.067766000  |
| 6                          | -2.759862000 | 0.628438000  | 0.399263000  | 6                          | -2.955777000 | 0.702168000  | 0.250529000  |
| 6                          | -3.655086000 | -0.407932000 | -0.008627000 | 6                          | -3.838368000 | -0.393035000 | 0.065930000  |
| 1                          | -2.972506000 | 1.403072000  | 1.118867000  | 1                          | -3.216031000 | 1.707742000  | 0.535787000  |
| 6                          | -2.975135000 | -1.180427000 | -0.907529000 | 6                          | -3.078610000 | -1.497957000 | -0.222500000 |
| 1                          | -3.245591000 | -2.046047000 | -1.489007000 | 1                          | -3.326451000 | -2.525899000 | -0.428100000 |
| 8                          | -1.723171000 | -0.705743000 | -1.057236000 | 8                          | -1.769505000 | -1.157511000 | -0.229206000 |
| 7                          | -4.946113000 | -0.586002000 | 0.413607000  | 7                          | -5.212341000 | -0.373273000 | 0.165201000  |
| 6                          | -6.052060000 | -0.712824000 | 0.788848000  | 6                          | -6.380639000 | -0.330586000 | 0.252969000  |
| E= -2105.78184114 Hartrees |              |              |              | E= -2105.84419601 Hartrees |              |              |              |
| <b>3l</b>                  |              |              |              | <b>3l'</b>                 |              |              |              |
| 24                         | 1.422232000  | -0.373561000 | 0.079807000  | 24                         | 1.522041000  | -0.355285000 | 0.004543000  |
| 6                          | 1.849310000  | 0.307385000  | 1.812787000  | 6                          | 2.167912000  | 0.325844000  | 1.652020000  |
| 8                          | 2.117677000  | 0.685642000  | 2.863032000  | 8                          | 2.598767000  | 0.696181000  | 2.657617000  |
| 6                          | 2.816954000  | -1.630429000 | 0.261926000  | 6                          | 3.046790000  | -1.387616000 | -0.214585000 |
| 8                          | 3.668824000  | -2.393160000 | 0.375606000  | 8                          | 4.000405000  | -2.035842000 | -0.357191000 |
| 6                          | 1.037241000  | -1.114309000 | -1.649813000 | 6                          | 0.788834000  | -0.976364000 | -1.642925000 |
| 8                          | 0.872282000  | -1.581008000 | -2.682445000 | 8                          | 0.383686000  | -1.339751000 | -2.657363000 |
| 6                          | 2.681059000  | 0.774356000  | -0.780734000 | 6                          | 2.399763000  | 1.023840000  | -0.954844000 |
| 8                          | 3.485698000  | 1.398196000  | -1.312364000 | 8                          | 3.008776000  | 1.797014000  | -1.560937000 |
| 6                          | 0.260023000  | -1.653018000 | 0.908083000  | 6                          | 0.736469000  | -1.799901000 | 0.977107000  |
| 8                          | -0.387013000 | -2.455525000 | 1.408808000  | 8                          | 0.351296000  | -2.698921000 | 1.583744000  |
| 6                          | -0.219611000 | 1.005294000  | -0.139221000 | 6                          | -0.366399000 | 0.800330000  | 0.158017000  |
| 7                          | -0.216527000 | 2.335045000  | -0.116832000 | 7                          | -0.491285000 | 2.225168000  | 0.226536000  |
| 6                          | -1.336058000 | 3.221573000  | -0.499484000 | 6                          | -0.826171000 | 2.898059000  | -1.027152000 |
| 1                          | -1.810402000 | 3.654265000  | 0.385150000  | 1                          | -1.170396000 | 3.918812000  | -0.824016000 |
| 1                          | -0.930660000 | 4.037124000  | -1.100973000 | 1                          | 0.039466000  | 2.961790000  | -1.708465000 |
| 1                          | -2.078249000 | 2.685947000  | -1.081458000 | 1                          | -1.624501000 | 2.364450000  | -1.541698000 |
| 6                          | 0.971007000  | 3.127318000  | 0.226579000  | 6                          | 0.497984000  | 2.961702000  | 0.989556000  |
| 1                          | 1.688083000  | 2.528417000  | 0.770281000  | 1                          | 0.626425000  | 2.510823000  | 1.972105000  |
| 1                          | 1.436456000  | 3.523692000  | -0.679370000 | 1                          | 1.483973000  | 3.016524000  | 0.501867000  |
| 1                          | 0.661015000  | 3.966168000  | 0.853258000  | 1                          | 0.140747000  | 3.987520000  | 1.134533000  |
| 6                          | -1.566905000 | 0.426810000  | -0.274806000 | 6                          | -1.644691000 | 0.218039000  | 0.064574000  |
| 6                          | -2.741040000 | 0.639384000  | 0.396400000  | 6                          | -2.942895000 | 0.711570000  | 0.250345000  |
| 6                          | -3.651858000 | -0.386595000 | -0.021880000 | 6                          | -3.840522000 | -0.381353000 | 0.063841000  |
| 1                          | -2.942993000 | 1.406399000  | 1.127260000  | 1                          | -3.197059000 | 1.717713000  | 0.539084000  |
| 6                          | -2.968363000 | -1.144201000 | -0.934486000 | 6                          | -3.069563000 | -1.481671000 | -0.229264000 |
| 1                          | -3.241271000 | -1.999763000 | -1.530406000 | 1                          | -3.314510000 | -2.509881000 | -0.439458000 |
| 8                          | -1.717778000 | -0.678065000 | -1.082534000 | 8                          | -1.764982000 | -1.147920000 | -0.237406000 |
| 6                          | -4.989875000 | -0.575289000 | 0.406851000  | 6                          | -5.253630000 | -0.369032000 | 0.164983000  |
| 7                          | -6.081240000 | -0.711486000 | 0.760668000  | 7                          | -6.408713000 | -0.349121000 | 0.247646000  |
| E= -2105.82010061 Hartrees |              |              |              | E= -2105.88416651 Hartrees |              |              |              |
